# Supplementary material for: Homokaryotic High-Quality Genome Assembly of Medicinal Fungi Wolfiporia hoelen Reveals Auto-Regulation and High-Temperature Adaption of Probable Two-Speed Genome
Source: Int J Mol Sci. 2022 Sep 10;23(18):10484. doi: 10.3390/ijms231810484 (PMC9503964; doi:10.3390/ijms231810484)
Supplement: Supplementary file 1 [file ijms-23-10484-s001.zip › ijms-1891587-Supplementary tables20220815.xlsx]

## Sheet: Table S1
Table S1. Statistics of W. hoelen genome assembly
Feature	Length
Estimated genome size (Mb)	70.2-77.3
Assembled contig sequences	78
Contig N50 (Mb)	3.76
Contig N90 (Kb)	488
Longest (Mb)	5.29
Anchor rate (Hi-C) (%)	90.36
Assembled genome size (Hi-C) (Mb)	58.26
Longest chromosome (Mb)	7.47
Shortest chromosome (Mb)	1.87
Chromosome number (Hi-C)	14

## Sheet: Table S2
Table S2. Genome size of different species in Polyporales
Species	Genome size(Mb)
Ganoderma lucidum	47.52
Lentinus tigrinus	39.53
Postia placenta	42.45
Phanerodontia chrysosporium	39.21
Ganoderma multipileum	46.38
Trametes coccinea	32.76
Lignosus rhinocerotis	34.31
Phlebiopsis gigantea	30.14
Laetiporus sulphureus	39.91
Daedalea quercina	32.74
Polyporus arcularius	43.45
Ganoderma sinense	48.96
Dichomitus squalens	42.75
Gelatoporia subvermispora	38.97
Trametes versicolor	44.79
Wolfiporia cocos	50.48
Fomitopsis pinicola	41.61
Phanerochaete carnosa	46.29
Phanerochaete sordida	41.21
Fomitopsis palustris	43.86
Amauroderma rugosum	40.66
Phlebia tremellosa	36.14
Taiwanofungus camphoratus	32.16
Tinctoporellus epimiltinus	46.18
Ganoderma sp. BRIUMSc	52.28
Coriolopsis trogii	38.81
Antrodiella citrinella	33.02
Fomitopsis rosea	36.53
Steccherinum ochraceum	35.27
Sparassis crispa	39.02
Ganoderma leucocontextum	49.52
Ganoderma tsugae	45.5
Trametes villosa	57.99
Sparassis latifolia	41.41
Grammothele lineata	42.32
Irpex lacteus	44.36
Trametes polyzona	36.63
Hermanssonia centrifuga	34.61
Trametes pubescens	39.74
Polyporus brumalis	53.43
Obba rivulosa	34.04
Grifola frondosa	39.29
Trametes sp. AH28-2	38.9
Trametes hirsuta	37.43
Lentinus polychrous	38.05
Trametes cinnabarina	33.67
Trametes sanguinea	36.58
Ganoderma boninense	56.03
Fibroporia radiculosa	28.38
Wolfiporia hoelen	64.44

## Sheet: Table S3
Table S3. Basic information of different chromosomes
Chromosome ID	Chromosome length	Gene number	Gene density (/kb)	Gene length	CDS length	GC content	Repetitive number	Repetitive length	Repetitive ratio	TE number	TE length	TE ratio	SCHG number	SCHG ratio	HG number	HG ratio	SP number	SP ratio
Chr01	7470629	1594	0.213369	1973	198	0.53	6134	2930022	39.2206	5590	2909098	38.9405	387	0.242785	856	0.537014	72	0.0451694
Chr02	5821966	1428	0.245278	1980	199	0.53	3948	1786336	30.6827	3502	1770011	30.4023	425	0.297619	837	0.586134	72	0.0504202
Chr03	5248211	897	0.170915	2062	199	0.52	4837	2515081	47.9226	4512	2500193	47.639	199	0.221851	440	0.490524	49	0.0546265
Chr04	5215655	825	0.158178	2020	187	0.52	5250	2674588	51.28	4942	2663567	51.0687	153	0.185455	383	0.464242	49	0.0593939
Chr05	4636192	725	0.156378	2080	192	0.52	4468	2380382	51.3435	4170	2369301	51.1045	133	0.183448	379	0.522759	34	0.0468966
Chr06	4105769	1072	0.261096	2036	202	0.53	2453	1061293	25.8488	2084	1049672	25.5658	348	0.324627	607	0.566231	51	0.0475746
Chr07	3770006	750	0.198939	1864	187	0.53	3083	1583375	41.9993	2809	1573343	41.7332	142	0.189333	362	0.482667	34	0.0453333
Chr08	3762476	449	0.119336	2108	179	0.51	4731	2301521	61.1704	4554	2294399	60.9811	44	0.0979955	184	0.4098	22	0.0489978
Chr09	3632075	524	0.14427	2017	174	0.52	3430	1938076	53.36	3219	1931388	53.1759	70	0.133588	227	0.433206	25	0.05
Chr10	3489124	494	0.141583	1982	187	0.51	3507	1839881	52.7319	3304	1833546	52.5503	55	0.111336	226	0.45749	23	0.0465587
Chr11	3276796	527	0.160828	2084	180	0.52	3095	1527994	46.6307	2877	1520065	46.3888	66	0.125237	222	0.421252	44	0.0834915
Chr12	3094583	451	0.145739	2095	184	0.52	3380	1688806	54.573	3193	1681421	54.3343	35	0.0776053	183	0.405765	33	0.0731707
Chr13	2861962	445	0.155488	1905	169	0.51	3606	1339217	46.7937	3399	1332028	46.5425	42	0.094382	165	0.370787	19	0.0426966
Chr14	1870227	167	0.089294	1923	172	0.5	3226	1342158	71.7644	3142	1338311	71.5587	0	0	41	0.245509	4	0.0239521
Note: SCG (single copy homologous genes); HG (homologous genes); SP (Secreted protein)

## Sheet: Table S4
Table S4. Gene family number count of different species
Orthogroup	Antsi	Daequ	Fompi	Fomros	Gansi	Lacbi	Laesu	Obbri	Pahoe	Polsqu	Pospl	Schco	Spalat	Trave	Wolco
OG0000000	44	27	23	24	21	13	73	61	13	44	23	10	33	15	16
OG0000001	6	15	37	39	106	8	13	17	6	58	5	11	25	77	8
OG0000002	5	10	33	18	77	5	3	0	0	53	27	8	42	50	5
OG0000003	18	7	9	8	21	0	15	144	10	11	13	0	11	20	18
OG0000004	12	17	26	22	20	2	28	33	9	22	26	2	24	35	14
OG0000005	29	34	34	30	4	4	17	7	9	4	24	1	23	2	16
OG0000006	24	15	28	15	26	13	7	6	8	13	21	7	7	26	21
OG0000007	7	8	13	15	14	7	6	44	7	20	10	2	7	54	21
OG0000008	9	3	7	8	33	16	2	35	9	34	9	19	1	16	11
OG0000009	1	0	1	1	50	0	1	1	0	38	0	1	0	112	1
OG0000010	1	0	4	1	51	1	0	0	2	33	1	0	8	93	1
OG0000011	6	4	6	6	7	15	6	70	14	11	4	7	2	12	13
OG0000012	5	0	8	12	7	61	15	7	0	22	2	15	14	10	0
OG0000013	29	12	19	12	1	0	13	0	9	3	37	0	26	1	12
OG0000014	4	2	40	48	1	12	1	1	0	9	2	7	7	34	5
OG0000015	35	22	18	18	0	0	23	5	19	0	13	0	0	0	18
OG0000016	10	20	16	11	6	1	21	4	23	5	6	0	11	16	18
OG0000017	5	5	5	4	23	12	3	16	0	36	1	10	4	39	3
OG0000018	27	2	7	12	5	40	6	15	0	10	6	7	19	8	2
OG0000019	12	13	21	19	19	6	9	11	3	11	6	5	1	24	4
OG0000020	9	14	11	12	12	11	9	16	5	20	8	0	10	19	7
OG0000021	18	11	52	17	7	0	1	5	7	11	9	0	2	16	3
OG0000022	14	9	7	8	29	6	17	7	12	10	15	3	3	7	11
OG0000023	0	0	0	0	27	0	0	0	0	114	0	0	0	16	0
OG0000024	27	13	21	8	6	3	8	16	4	8	0	2	18	5	16
OG0000025	5	12	18	8	9	4	5	10	5	25	8	9	6	15	8
OG0000026	5	0	0	0	0	0	0	0	0	0	142	0	0	0	0
OG0000027	12	17	22	12	2	2	10	10	9	5	10	10	2	3	20
OG0000028	22	27	7	13	2	1	10	2	17	4	10	1	5	2	19
OG0000029	15	34	23	24	0	0	0	14	9	0	6	0	7	0	10
OG0000030	19	9	8	8	0	6	12	28	11	0	16	0	8	0	16
OG0000031	8	12	7	4	12	0	8	25	7	15	7	0	7	17	12
OG0000032	12	19	17	10	7	4	14	4	13	14	7	2	0	1	15
OG0000033	25	6	11	6	0	7	8	46	6	0	9	3	0	0	9
OG0000034	0	0	0	0	0	0	0	0	0	0	134	0	0	0	0
OG0000035	3	12	5	4	9	16	8	2	0	28	3	6	14	13	8
OG0000036	11	14	10	19	2	5	14	0	12	4	10	2	11	5	11
OG0000037	4	6	7	15	10	11	0	8	0	6	8	41	9	3	0
OG0000038	1	0	17	3	27	8	21	4	0	21	1	2	6	13	4
OG0000039	15	6	8	20	3	0	45	1	12	2	4	0	3	1	7
OG0000040	1	6	12	4	19	20	16	1	1	10	7	7	15	7	1
OG0000041	6	12	9	10	11	1	10	21	6	3	13	3	5	7	9
OG0000042	14	5	3	1	0	68	1	6	0	2	1	11	1	0	13
OG0000043	17	8	10	6	15	1	6	9	8	6	6	5	2	11	15
OG0000044	15	11	7	8	16	0	4	10	9	9	10	0	3	13	9
OG0000045	10	9	12	9	9	4	7	6	11	4	7	8	7	7	12
OG0000046	83	2	6	5	0	0	1	1	3	0	10	0	0	0	8
OG0000047	11	8	5	8	1	4	8	17	3	3	10	0	36	2	3
OG0000048	0	0	2	3	1	70	8	6	0	2	11	3	8	2	1
OG0000049	9	10	11	10	3	3	8	9	9	2	9	6	13	1	12
OG0000050	0	0	0	0	101	0	1	0	0	1	1	0	1	4	6
OG0000051	0	0	0	0	0	115	0	0	0	0	0	0	0	0	0
OG0000052	6	6	7	4	19	8	8	14	4	6	5	6	6	9	5
OG0000053	8	4	3	1	3	24	7	15	6	1	4	3	16	12	4
OG0000054	8	9	5	8	10	5	4	15	4	11	12	4	8	6	2
OG0000055	2	0	35	2	0	8	0	1	0	19	1	6	5	29	1
OG0000056	1	3	6	0	2	2	4	1	0	0	82	0	0	7	1
OG0000057	10	12	11	13	5	0	4	6	10	3	14	2	2	7	9
OG0000058	6	7	5	6	6	2	8	20	5	14	8	1	5	9	6
OG0000059	4	6	8	6	9	5	4	6	5	7	6	17	4	15	5
OG0000060	3	10	4	3	4	31	6	0	0	11	3	6	19	6	0
OG0000061	4	4	6	3	7	6	5	4	0	8	10	0	22	26	0
OG0000062	2	10	7	7	5	35	1	6	0	0	0	6	2	2	22
OG0000063	11	9	8	7	16	1	6	8	9	7	6	1	2	5	8
OG0000064	3	14	27	9	0	0	13	0	6	0	8	0	8	0	16
OG0000065	0	0	31	32	0	4	0	0	0	14	0	2	1	20	0
OG0000066	0	0	0	0	0	0	104	0	0	0	0	0	0	0	0
OG0000067	8	9	8	5	6	3	8	12	7	2	10	4	2	14	5
OG0000068	9	15	13	10	1	8	7	1	9	4	9	0	4	2	8
OG0000069	1	0	1	0	11	11	1	41	0	7	1	0	0	25	0
OG0000070	5	6	6	10	6	5	5	7	4	5	6	16	6	7	4
OG0000071	2	5	7	5	8	5	17	3	6	5	10	4	2	4	15
OG0000072	2	8	21	7	6	17	5	7	0	6	7	2	2	5	3
OG0000073	4	0	35	0	0	7	0	2	0	13	0	5	4	26	1
OG0000074	3	2	5	8	14	0	2	0	0	23	10	0	0	30	0
OG0000075	7	7	8	7	15	0	10	1	9	2	7	6	3	2	12
OG0000076	5	9	14	20	12	1	2	1	2	7	3	1	1	15	3
OG0000077	10	5	4	12	3	14	3	6	0	5	3	6	19	4	0
OG0000078	8	5	5	10	13	1	9	1	5	15	4	1	2	10	5
OG0000079	1	1	3	5	27	1	8	7	3	20	3	2	3	6	4
OG0000080	0	0	0	0	41	0	0	0	0	20	0	0	0	33	0
OG0000081	1	4	7	5	6	20	10	3	9	3	7	4	1	3	10
OG0000082	8	1	0	2	4	17	3	2	0	16	0	7	10	5	17
OG0000083	6	6	3	10	7	19	4	2	0	11	0	9	6	2	7
OG0000084	1	2	2	2	14	20	1	4	4	6	2	13	10	7	3
OG0000085	3	4	6	6	13	2	2	8	2	10	4	5	5	18	3
OG0000086	1	0	3	13	2	34	3	11	0	3	1	3	13	3	1
OG0000087	0	0	0	0	0	0	0	0	0	0	91	0	0	0	0
OG0000088	4	4	7	6	4	0	2	6	3	12	6	1	4	27	4
OG0000089	0	5	7	14	29	1	0	0	0	11	0	0	0	23	0
OG0000090	5	5	7	8	13	4	4	1	9	15	4	0	4	4	6
OG0000091	5	5	5	2	17	10	3	8	3	13	2	3	3	7	3
OG0000092	0	0	0	0	0	0	0	0	0	0	89	0	0	0	0
OG0000093	15	6	6	6	7	4	3	4	7	5	5	1	3	7	7
OG0000094	5	5	7	12	4	5	3	4	2	9	2	11	4	11	2
OG0000095	3	6	4	3	16	1	3	4	4	10	4	7	2	11	7
OG0000096	10	9	8	8	7	1	1	14	6	6	2	5	0	0	8
OG0000097	4	5	7	2	8	2	4	5	1	10	6	16	6	8	1
OG0000098	5	6	6	6	7	1	6	13	4	9	5	2	5	5	5
OG0000099	0	0	0	0	0	84	0	0	0	0	0	0	0	0	0
OG0000100	5	8	9	7	0	3	9	8	8	0	11	0	5	0	10
OG0000101	0	0	13	7	0	14	8	2	0	4	1	1	7	26	0
OG0000102	0	0	14	7	13	9	0	2	0	15	0	0	4	18	0
OG0000103	5	6	7	7	7	0	2	6	4	10	5	3	6	8	4
OG0000104	3	5	4	3	7	6	6	8	7	5	3	7	5	5	6
OG0000105	9	8	10	17	14	5	0	0	0	6	0	4	1	4	2
OG0000106	0	0	1	0	0	79	0	0	0	0	0	0	0	0	0
OG0000107	4	4	6	7	2	0	3	12	5	9	8	0	5	7	7
OG0000108	1	0	1	10	2	25	3	11	0	1	1	5	15	3	1
OG0000109	6	8	6	9	5	5	6	8	3	1	5	8	2	2	2
OG0000110	1	0	7	6	0	4	15	4	0	1	0	13	9	16	0
OG0000111	0	0	0	0	0	0	0	0	0	0	76	0	0	0	0
OG0000112	9	6	6	10	2	0	3	7	8	2	6	0	6	3	7
OG0000113	0	1	2	11	3	29	4	2	0	11	0	1	0	11	0
OG0000114	0	0	0	0	9	0	11	1	2	8	0	0	28	15	1
OG0000115	0	0	0	0	0	1	0	0	0	0	0	74	0	0	0
OG0000116	0	0	0	0	0	0	0	0	0	0	75	0	0	0	0
OG0000117	8	14	9	6	0	1	5	1	2	0	8	1	11	0	8
OG0000118	5	5	5	5	4	1	7	7	7	7	6	2	3	3	7
OG0000119	5	1	1	1	9	3	1	23	0	9	5	6	1	8	1
OG0000120	5	7	7	5	2	2	5	4	7	5	9	2	1	5	8
OG0000121	4	4	4	3	10	0	4	6	3	8	6	6	2	11	3
OG0000122	0	0	0	0	0	0	0	0	0	0	0	74	0	0	0
OG0000123	7	5	3	5	3	3	9	11	6	5	5	3	3	3	2
OG0000124	8	10	12	9	4	1	11	0	4	1	7	0	1	0	5
OG0000125	0	2	0	0	67	0	1	1	0	0	0	0	0	1	1
OG0000126	5	4	4	5	7	1	6	4	4	6	6	4	5	6	5
OG0000127	8	3	8	6	6	1	4	4	5	3	2	3	7	1	11
OG0000128	11	6	7	8	5	1	4	6	5	2	4	0	4	3	6
OG0000129	11	1	1	2	8	2	8	3	5	7	3	1	3	9	8
OG0000130	2	5	8	4	0	39	12	0	0	0	0	0	1	1	0
OG0000131	0	1	2	6	8	0	6	9	3	9	4	1	5	16	2
OG0000132	0	1	12	2	8	7	0	2	0	12	0	1	15	12	0
OG0000133	7	8	8	4	3	3	2	5	4	3	5	9	3	3	4
OG0000134	6	2	3	5	3	1	5	6	3	5	16	4	3	4	5
OG0000135	21	4	5	10	3	5	3	0	1	4	10	2	0	2	1
OG0000136	6	8	8	7	7	0	4	1	2	3	6	0	7	7	4
OG0000137	5	0	0	1	30	0	1	1	0	15	1	0	6	9	1
OG0000138	0	0	1	4	3	15	3	2	0	4	23	3	8	4	0
OG0000139	6	11	10	12	1	8	7	1	3	1	1	0	1	0	7
OG0000140	4	6	8	8	3	3	6	3	4	4	4	7	2	3	4
OG0000141	1	9	8	8	6	2	1	6	2	8	4	5	2	5	2
OG0000142	0	2	7	7	3	21	1	9	0	5	0	5	1	8	0
OG0000143	0	0	17	7	9	0	1	0	0	14	0	0	11	10	0
OG0000144	6	5	6	5	7	0	4	9	5	1	5	2	5	3	5
OG0000145	6	6	7	6	1	1	5	4	4	3	6	5	8	2	4
OG0000146	0	0	0	0	52	0	0	3	0	0	0	0	0	13	0
OG0000147	5	6	5	4	3	2	3	4	5	5	3	7	4	6	5
OG0000148	2	9	7	7	15	0	1	0	3	6	7	0	2	5	3
OG0000149	3	2	4	3	4	0	6	3	4	7	7	6	7	6	5
OG0000150	7	6	8	0	0	1	7	0	0	1	5	13	8	0	10
OG0000151	5	5	5	5	8	0	7	2	5	4	4	1	2	8	5
OG0000152	4	7	4	4	4	4	2	2	5	6	5	5	4	4	6
OG0000153	4	2	6	3	3	0	2	2	3	12	5	11	4	6	3
OG0000154	6	2	3	3	3	3	0	3	1	11	4	1	21	4	1
OG0000155	1	1	2	2	27	1	4	3	3	9	1	1	3	7	1
OG0000156	1	4	5	5	3	8	4	3	4	1	12	3	2	4	7
OG0000157	0	0	0	0	0	0	0	0	0	0	66	0	0	0	0
OG0000158	4	6	7	5	5	3	3	3	4	5	3	3	3	7	4
OG0000159	5	3	4	4	5	6	4	12	3	2	3	4	2	3	5
OG0000160	3	2	3	4	7	6	2	10	3	5	4	3	4	3	6
OG0000161	4	14	9	7	1	1	5	5	0	4	2	0	9	2	2
OG0000162	2	1	8	6	3	5	0	12	0	8	2	10	0	8	0
OG0000163	0	0	0	0	0	65	0	0	0	0	0	0	0	0	0
OG0000164	0	0	0	0	0	0	0	0	0	0	0	65	0	0	0
OG0000165	7	8	6	6	2	0	2	6	5	8	1	0	3	5	5
OG0000166	2	2	2	2	10	4	2	11	0	8	2	6	4	5	4
OG0000167	7	1	1	2	8	15	2	0	2	3	4	5	6	5	3
OG0000168	3	0	6	8	5	13	8	3	0	3	0	4	8	3	0
OG0000169	0	4	5	0	4	4	6	5	2	5	3	4	12	6	4
OG0000170	0	3	14	2	2	14	1	0	0	2	0	4	3	19	0
OG0000171	4	6	7	6	3	0	2	4	3	10	3	5	1	6	3
OG0000172	5	6	3	4	3	0	3	6	8	6	5	2	2	5	5
OG0000173	10	2	1	5	2	0	10	6	4	6	0	0	7	2	8
OG0000174	7	0	0	0	10	16	3	0	1	9	4	0	4	8	1
OG0000175	0	1	6	5	7	9	9	7	0	3	0	3	7	6	0
OG0000176	0	0	0	0	7	41	0	8	0	3	0	0	0	4	0
OG0000177	3	4	4	4	6	8	3	2	3	5	3	7	3	4	3
OG0000178	4	1	2	1	12	1	0	4	3	9	5	3	5	9	3
OG0000179	4	6	9	10	2	1	2	2	4	5	8	0	4	1	4
OG0000180	2	3	3	3	24	0	2	3	2	3	2	1	3	9	2
OG0000181	0	0	8	9	7	6	0	0	0	6	0	0	11	0	15
OG0000182	3	9	3	5	2	1	5	5	4	6	6	1	2	5	4
OG0000183	4	1	3	2	5	0	6	8	5	6	6	0	2	3	10
OG0000184	6	5	6	5	3	1	3	1	9	3	5	1	1	3	9
OG0000185	3	6	15	5	1	4	3	5	1	2	8	0	5	2	1
OG0000186	1	0	9	0	1	19	1	2	0	5	0	1	4	17	1
OG0000187	3	5	9	4	5	6	2	3	5	3	3	4	1	5	3
OG0000188	0	0	3	2	10	0	2	0	0	21	0	0	1	22	0
OG0000189	0	0	0	0	43	0	0	0	0	16	0	0	0	2	0
OG0000190	0	0	0	0	1	0	0	0	0	57	0	0	0	3	0
OG0000191	13	3	3	4	2	2	3	2	2	9	6	2	2	3	4
OG0000192	4	2	2	2	5	6	6	5	0	5	6	2	5	7	3
OG0000193	5	3	3	3	2	1	4	3	5	2	10	7	3	4	5
OG0000194	2	3	3	5	3	1	2	4	2	9	6	4	6	6	4
OG0000195	1	6	5	4	2	0	3	3	7	3	6	7	0	3	10
OG0000196	0	0	3	1	2	14	6	1	0	8	0	3	6	16	0
OG0000197	0	0	45	0	1	5	1	1	0	0	0	4	2	1	0
OG0000198	0	0	0	0	0	0	0	0	0	0	0	0	0	0	60
OG0000199	4	5	6	4	11	2	3	6	2	2	3	4	1	4	2
OG0000200	3	3	5	3	3	3	6	3	3	7	3	6	3	5	3
OG0000201	2	2	3	7	6	0	3	7	1	6	1	1	0	19	1
OG0000202	3	4	3	3	4	7	3	4	3	5	2	6	3	5	4
OG0000203	2	1	7	3	0	10	10	1	0	1	1	2	1	5	15
OG0000204	1	0	11	3	0	8	6	0	0	0	1	10	3	16	0
OG0000205	4	0	3	0	0	2	33	5	0	4	5	0	0	1	2
OG0000206	0	2	2	13	1	6	2	3	7	3	5	0	2	0	13
OG0000207	4	4	4	4	4	6	3	4	4	4	4	2	4	3	4
OG0000208	4	5	11	8	1	2	5	2	4	3	4	3	1	2	3
OG0000209	3	7	10	6	1	0	4	6	5	4	3	1	2	4	2
OG0000210	3	7	5	7	1	3	4	3	4	1	11	2	2	1	4
OG0000211	6	3	3	4	2	1	5	7	7	2	4	0	6	2	6
OG0000212	1	3	2	0	1	9	12	1	0	9	4	1	8	3	4
OG0000213	3	3	4	4	4	11	2	0	0	0	0	1	4	4	18
OG0000214	0	0	0	0	1	0	0	0	0	2	0	0	0	54	1
OG0000215	8	3	5	3	3	3	4	7	3	3	3	3	3	3	3
OG0000216	55	0	0	0	0	0	0	0	0	0	2	0	0	0	0
OG0000217	4	0	7	10	0	0	11	1	0	17	1	1	3	2	0
OG0000218	1	1	1	1	11	1	1	5	1	5	1	0	1	26	1
OG0000219	2	2	2	2	5	17	2	1	2	6	3	5	2	4	2
OG0000220	0	0	2	2	2	9	4	2	0	14	0	11	3	8	0
OG0000221	0	0	0	0	6	1	3	5	3	9	4	0	1	1	24
OG0000222	4	3	4	5	4	2	3	3	8	3	2	5	1	3	6
OG0000223	7	5	4	6	9	3	0	2	5	6	2	0	1	0	6
OG0000224	3	4	6	7	5	2	5	2	4	5	3	2	1	4	3
OG0000225	2	3	3	3	11	6	2	7	2	6	3	3	1	2	2
OG0000226	4	6	6	6	0	8	5	0	3	0	4	5	4	0	4
OG0000227	3	4	5	5	1	3	5	3	5	3	4	5	2	3	4
OG0000228	4	4	4	5	1	1	2	4	4	5	4	6	3	4	4
OG0000229	8	4	2	3	1	5	4	2	9	3	4	0	3	1	6
OG0000230	6	3	2	9	5	14	0	3	0	4	0	8	1	0	0
OG0000231	2	2	3	3	3	9	7	3	2	4	3	5	4	3	2
OG0000232	2	4	5	4	6	2	2	2	4	4	2	6	2	6	4
OG0000233	2	3	4	3	1	14	3	1	7	3	3	2	3	2	4
OG0000234	1	3	5	4	7	1	3	5	4	6	2	1	3	6	4
OG0000235	2	0	30	11	2	5	0	0	0	0	1	0	4	0	0
OG0000236	0	1	0	1	29	0	0	0	0	7	0	0	2	14	1
OG0000237	3	2	3	3	5	2	4	5	4	4	2	3	2	7	5
OG0000238	6	3	2	3	0	0	4	0	7	0	3	15	4	0	7
OG0000239	4	4	4	4	4	1	4	2	4	4	4	3	4	4	4
OG0000240	4	7	5	6	1	5	4	1	3	1	3	7	3	1	3
OG0000241	3	4	1	2	10	5	4	2	1	5	2	3	5	3	4
OG0000242	2	3	3	3	9	6	4	2	2	4	2	1	4	4	5
OG0000243	1	0	13	1	5	0	7	3	0	2	0	0	16	6	0
OG0000244	0	0	0	0	0	53	0	0	0	0	0	1	0	0	0
OG0000245	4	7	6	6	3	0	5	3	4	3	4	0	2	2	4
OG0000246	5	2	9	2	4	9	8	0	1	1	10	0	0	0	2
OG0000247	9	1	0	1	1	3	8	6	6	3	2	2	1	2	8
OG0000248	9	7	9	0	2	1	0	6	0	4	5	1	3	5	0
OG0000249	2	1	0	3	1	10	3	14	0	2	2	12	0	1	1
OG0000250	3	6	6	8	2	1	5	3	5	3	3	0	1	3	3
OG0000251	1	1	1	1	16	1	1	3	1	7	2	0	1	15	1
OG0000252	3	3	3	5	2	2	2	7	2	4	4	3	3	6	3
OG0000253	2	3	2	5	1	18	3	3	3	1	2	1	3	2	3
OG0000254	3	3	4	3	3	5	3	6	3	3	2	3	3	6	2
OG0000255	2	2	8	4	0	1	9	0	7	1	4	1	5	2	6
OG0000256	1	0	9	4	0	4	10	1	0	5	2	1	1	13	1
OG0000257	0	3	3	2	3	10	10	3	0	1	5	4	5	3	0
OG0000258	7	5	4	3	4	0	4	3	2	4	2	5	2	4	2
OG0000259	2	3	4	2	2	4	4	4	4	5	4	1	5	4	3
OG0000260	3	4	5	3	3	7	2	6	1	1	3	4	3	3	3
OG0000261	1	1	3	3	11	1	2	7	0	3	4	0	3	9	3
OG0000262	3	7	8	18	0	5	0	0	1	0	3	0	4	0	2
OG0000263	3	1	8	0	2	1	9	2	0	1	5	0	0	12	7
OG0000264	0	7	3	0	0	9	9	0	0	1	0	8	10	4	0
OG0000265	0	0	0	1	3	0	0	17	0	7	2	0	12	9	0
OG0000266	0	0	0	0	0	0	0	0	2	0	0	0	0	0	49
OG0000267	12	2	2	3	0	7	2	0	1	0	15	2	0	0	4
OG0000268	2	6	7	5	2	3	2	2	2	2	2	5	4	4	2
OG0000269	3	4	3	7	2	0	3	5	3	2	3	3	4	5	3
OG0000270	6	7	5	6	0	0	0	2	3	0	10	0	2	0	9
OG0000271	5	6	6	3	3	1	2	4	3	3	4	1	2	3	4
OG0000272	1	3	9	3	4	1	2	7	1	6	1	2	2	6	2
OG0000273	5	0	1	3	0	0	2	30	4	1	0	0	0	1	3
OG0000274	1	6	5	5	2	2	2	4	2	10	0	2	4	3	2
OG0000275	5	5	4	3	1	6	0	0	11	0	2	1	1	0	11
OG0000276	3	2	1	3	4	1	3	3	6	1	4	1	5	9	4
OG0000277	4	6	6	4	6	1	1	3	4	4	2	1	2	3	3
OG0000278	0	3	4	5	3	3	4	3	1	1	6	0	6	8	3
OG0000279	0	0	0	2	8	0	0	9	2	13	0	0	1	7	8
OG0000280	0	0	0	0	10	0	0	4	0	10	0	14	0	12	0
OG0000281	0	0	0	0	0	50	0	0	0	0	0	0	0	0	0
OG0000282	0	0	0	0	0	0	0	0	0	0	0	50	0	0	0
OG0000283	6	5	6	3	0	0	3	11	3	2	4	1	4	0	1
OG0000284	3	3	3	5	3	7	1	2	3	4	3	1	3	5	3
OG0000285	3	4	3	5	3	1	4	4	3	5	3	2	2	4	3
OG0000286	3	3	5	4	1	2	2	9	3	3	3	2	3	2	4
OG0000287	1	0	0	0	2	3	4	2	14	1	5	0	2	0	15
OG0000288	0	0	0	0	0	47	0	0	0	0	0	2	0	0	0
OG0000289	2	4	3	3	4	0	2	6	4	5	3	2	1	5	4
OG0000290	4	4	4	4	2	1	6	2	4	2	4	2	3	2	4
OG0000291	5	3	4	4	5	2	1	4	2	3	4	3	0	3	5
OG0000292	2	4	3	3	5	1	2	6	2	3	3	1	6	5	2
OG0000293	4	8	5	6	1	1	3	1	3	3	4	2	3	1	3
OG0000294	1	2	2	2	8	0	1	12	2	11	0	0	1	4	2
OG0000295	1	0	0	0	0	0	1	0	16	0	1	0	0	0	29
OG0000296	0	2	2	3	7	6	3	1	0	7	2	2	6	7	0
OG0000297	0	9	0	1	2	9	0	2	0	1	1	2	10	2	9
OG0000298	0	0	3	1	0	11	0	1	0	11	0	9	3	2	7
OG0000299	0	0	0	0	4	3	4	12	0	2	1	4	17	1	0
OG0000300	0	0	0	0	0	0	47	0	0	0	1	0	0	0	0
OG0000301	5	1	2	1	11	2	3	3	2	1	5	0	1	5	5
OG0000302	4	9	5	3	0	4	1	0	3	0	4	3	0	0	11
OG0000303	2	0	0	0	11	10	0	6	0	7	0	0	3	8	0
OG0000304	1	1	1	1	10	2	3	2	4	2	3	5	1	4	7
OG0000305	2	1	1	1	6	0	4	2	8	9	3	0	1	2	7
OG0000306	3	3	3	3	3	2	6	3	3	2	3	3	3	3	4
OG0000307	1	4	3	6	4	5	3	4	3	3	3	2	1	1	4
OG0000308	1	0	5	0	1	13	3	8	0	3	1	3	1	5	3
OG0000309	0	0	5	3	0	5	19	0	0	0	0	3	7	5	0
OG0000310	0	0	0	0	26	1	0	0	0	9	0	0	0	11	0
OG0000311	0	0	0	0	0	47	0	0	0	0	0	0	0	0	0
OG0000312	3	1	1	1	7	3	3	2	2	8	3	3	1	5	3
OG0000313	3	3	3	3	3	3	3	3	3	3	3	4	3	3	3
OG0000314	2	0	2	1	5	2	2	11	3	5	2	0	1	7	3
OG0000315	3	4	7	6	0	6	2	0	0	0	1	16	1	0	0
OG0000316	2	4	2	4	2	1	5	2	7	2	1	4	2	4	4
OG0000317	1	3	2	0	0	2	6	0	16	3	1	0	1	2	9
OG0000318	4	2	2	2	3	1	4	1	7	3	2	1	3	5	6
OG0000319	0	12	13	9	0	4	6	0	0	0	0	1	1	0	0
OG0000320	0	1	1	0	10	8	5	6	0	8	3	1	0	3	0
OG0000321	5	6	2	4	1	1	4	4	3	2	4	2	1	1	5
OG0000322	5	8	9	9	0	0	0	0	0	0	4	0	10	0	0
OG0000323	2	1	1	1	2	9	1	1	6	4	2	6	2	3	4
OG0000324	3	6	7	6	5	0	3	3	2	3	2	0	1	1	3
OG0000325	2	4	7	6	1	1	5	3	3	2	3	1	2	2	3
OG0000326	1	3	9	2	5	13	0	0	0	4	0	2	2	4	0
OG0000327	3	3	3	3	2	2	6	7	2	2	5	0	2	2	3
OG0000328	4	3	3	3	2	1	3	6	4	5	3	0	2	2	4
OG0000329	2	2	2	2	5	3	3	5	1	8	1	1	2	7	1
OG0000330	2	3	3	3	5	3	2	3	2	4	2	4	2	5	2
OG0000331	1	3	2	3	3	9	3	3	2	4	2	1	2	5	2
OG0000332	1	3	5	5	0	0	4	3	5	0	13	0	1	0	5
OG0000333	1	1	3	2	5	3	4	5	1	6	2	1	3	5	3
OG0000334	1	0	0	0	1	0	1	22	2	5	0	0	2	4	7
OG0000335	1	0	4	6	4	15	2	3	1	2	2	1	0	3	1
OG0000336	2	8	9	8	2	1	1	1	1	4	1	3	1	2	1
OG0000337	0	0	0	0	45	0	0	0	0	0	0	0	0	0	0
OG0000338	0	0	0	0	0	45	0	0	0	0	0	0	0	0	0
OG0000339	0	0	0	0	0	45	0	0	0	0	0	0	0	0	0
OG0000340	0	0	0	0	0	0	0	0	1	1	0	0	0	2	41
OG0000341	3	4	3	3	3	1	3	3	2	3	3	3	4	3	3
OG0000342	3	3	3	3	3	1	3	3	3	3	5	1	4	3	3
OG0000343	5	2	2	2	4	5	3	3	2	3	4	2	2	3	2
OG0000344	2	0	0	0	1	3	3	1	1	22	2	0	4	2	3
OG0000345	2	3	3	3	2	13	2	0	2	3	0	3	1	5	2
OG0000346	4	2	6	2	0	0	1	5	6	0	8	0	1	0	9
OG0000347	3	2	2	2	4	4	2	3	3	5	2	2	3	4	3
OG0000348	1	1	1	1	2	8	2	1	1	3	3	17	0	2	1
OG0000349	1	2	2	2	4	2	1	1	3	8	3	4	2	7	2
OG0000350	2	3	3	4	2	2	2	4	4	4	4	2	1	3	4
OG0000351	4	1	6	2	4	3	3	4	3	1	3	1	3	2	4
OG0000352	2	4	2	1	1	3	0	0	1	7	4	8	3	3	5
OG0000353	0	1	7	3	12	2	0	0	0	5	0	5	1	8	0
OG0000354	0	0	0	44	0	0	0	0	0	0	0	0	0	0	0
OG0000355	0	0	0	0	0	44	0	0	0	0	0	0	0	0	0
OG0000356	0	0	0	0	0	0	0	0	0	0	0	44	0	0	0
OG0000357	1	0	0	0	1	0	5	8	6	5	0	0	2	4	11
OG0000358	4	2	2	5	3	3	3	4	4	2	2	3	2	2	2
OG0000359	3	3	3	3	3	3	3	3	3	2	3	2	3	3	3
OG0000360	7	5	4	4	1	1	5	2	3	1	3	1	2	1	3
OG0000361	3	2	2	2	7	2	2	3	2	4	3	1	2	6	2
OG0000362	2	2	2	1	12	2	3	0	4	0	4	2	2	2	5
OG0000363	2	3	4	3	6	1	4	1	2	5	2	1	1	6	2
OG0000364	2	4	4	4	1	3	3	0	0	5	5	0	7	5	0
OG0000365	3	2	2	2	3	2	5	3	3	3	3	3	3	3	3
OG0000366	1	1	1	1	9	0	3	3	2	9	1	0	1	7	4
OG0000367	0	1	1	5	0	3	4	5	11	4	0	0	1	2	6
OG0000368	0	0	5	6	4	8	2	0	0	10	0	5	2	1	0
OG0000369	0	0	0	0	0	0	0	0	0	0	0	0	43	0	0
OG0000370	4	2	2	2	9	0	4	0	2	6	5	0	1	3	2
OG0000371	2	7	6	5	3	0	2	2	0	9	1	0	1	4	0
OG0000372	2	2	3	3	0	0	9	1	5	0	12	0	0	0	5
OG0000373	3	3	3	3	2	1	3	3	3	3	3	3	4	2	3
OG0000374	6	2	2	3	2	0	3	3	6	3	3	0	2	2	5
OG0000375	2	1	4	3	2	6	3	3	3	3	1	2	2	4	3
OG0000376	2	3	3	3	3	3	2	3	3	3	2	2	2	5	3
OG0000377	4	3	3	3	2	3	4	3	3	2	3	1	2	2	4
OG0000378	3	2	5	2	12	7	0	0	0	5	0	3	0	3	0
OG0000379	1	3	4	3	4	2	1	3	1	5	1	6	1	6	1
OG0000380	1	4	11	5	8	0	0	0	0	3	5	0	0	5	0
OG0000381	3	2	5	4	2	1	0	6	0	2	2	2	8	5	0
OG0000382	3	3	11	1	5	5	5	0	0	0	0	1	0	4	4
OG0000383	1	0	41	0	0	0	0	0	0	0	0	0	0	0	0
OG0000384	0	2	3	0	0	26	9	0	0	2	0	0	0	0	0
OG0000385	0	28	4	10	0	0	0	0	0	0	0	0	0	0	0
OG0000386	0	0	6	2	3	2	6	2	0	11	0	0	3	6	1
OG0000387	0	0	0	0	0	0	0	0	0	41	0	0	0	1	0
OG0000388	2	2	2	2	7	1	2	2	2	6	2	3	3	3	2
OG0000389	3	1	1	2	4	1	2	6	3	6	3	2	2	1	4
OG0000390	3	3	3	4	3	2	4	2	3	2	3	2	2	2	3
OG0000391	4	6	7	2	1	1	3	3	2	1	3	3	2	1	2
OG0000392	5	4	4	0	0	7	2	2	0	6	1	0	2	6	2
OG0000393	3	3	4	2	4	4	4	3	0	4	2	2	2	4	0
OG0000394	3	4	3	3	3	4	2	7	2	2	2	0	2	2	2
OG0000395	4	5	6	6	0	1	1	0	8	0	3	0	0	0	7
OG0000396	5	4	4	4	0	1	2	0	5	2	4	3	1	1	5
OG0000397	2	2	3	2	4	3	2	3	3	2	2	3	6	2	2
OG0000398	3	3	2	8	0	0	8	0	8	0	3	0	0	0	6
OG0000399	2	3	3	3	3	4	2	5	2	2	4	3	1	2	2
OG0000400	1	1	4	2	2	1	3	2	1	4	1	4	2	12	1
OG0000401	3	8	8	1	0	3	1	2	2	7	1	0	2	2	1
OG0000402	2	2	4	3	3	0	5	1	3	3	2	3	3	3	4
OG0000403	1	0	0	3	0	0	0	0	5	1	2	0	0	2	27
OG0000404	0	1	2	2	2	0	1	20	4	3	0	0	0	1	5
OG0000405	0	1	1	0	2	22	0	1	0	1	0	1	4	2	6
OG0000406	0	0	0	0	2	1	15	5	0	4	0	0	8	6	0
OG0000407	0	0	0	0	0	0	0	0	0	0	41	0	0	0	0
OG0000408	2	2	4	2	5	0	1	7	1	4	3	1	2	5	1
OG0000409	4	4	8	7	0	3	3	0	3	0	4	0	0	0	4
OG0000410	4	3	3	4	2	0	3	5	2	1	3	2	4	2	2
OG0000411	2	2	3	2	4	3	3	2	2	5	2	1	3	4	2
OG0000412	3	3	3	3	2	3	3	2	4	2	3	1	3	1	4
OG0000413	4	7	6	4	1	1	2	1	4	1	2	1	1	1	4
OG0000414	2	4	3	3	2	1	2	3	3	3	5	0	1	3	5
OG0000415	2	3	3	4	1	0	2	1	5	1	2	5	1	1	9
OG0000416	5	4	3	1	7	0	1	1	1	7	4	0	2	3	1
OG0000417	1	0	0	0	3	8	5	0	0	10	0	6	0	7	0
OG0000418	0	1	8	2	5	1	1	1	1	12	1	0	0	7	0
OG0000419	0	0	5	2	7	1	6	0	0	14	0	0	2	3	0
OG0000420	0	0	0	0	0	0	0	40	0	0	0	0	0	0	0
OG0000421	2	2	2	2	8	3	3	2	2	5	2	1	1	2	2
OG0000422	4	3	4	4	3	1	3	4	2	2	1	1	2	2	3
OG0000423	2	3	3	3	3	2	3	1	2	2	3	4	3	2	3
OG0000424	1	2	4	2	5	0	5	4	0	6	2	2	3	3	0
OG0000425	3	3	3	3	2	2	3	2	3	2	3	3	2	2	3
OG0000426	4	2	2	3	1	1	6	4	2	2	4	3	3	1	1
OG0000427	2	3	4	4	2	3	3	3	2	2	3	3	2	1	2
OG0000428	1	1	5	2	7	1	0	2	1	2	2	2	3	8	2
OG0000429	1	1	3	2	4	2	4	4	1	5	3	1	2	3	3
OG0000430	0	25	4	3	0	0	0	2	0	3	0	0	0	2	0
OG0000431	0	1	3	6	4	9	2	0	0	9	0	1	3	1	0
OG0000432	0	4	1	31	0	0	0	2	0	0	0	0	1	0	0
OG0000433	0	1	0	5	3	5	1	2	0	6	9	3	1	3	0
OG0000434	0	0	36	0	0	0	0	0	0	0	0	3	0	0	0
OG0000435	0	0	8	1	4	0	0	1	0	0	2	2	4	16	1
OG0000436	0	0	0	0	0	39	0	0	0	0	0	0	0	0	0
OG0000437	0	0	0	0	0	0	0	0	0	0	0	39	0	0	0
OG0000438	3	3	4	2	2	0	3	4	3	1	3	0	3	4	3
OG0000439	1	2	2	1	3	3	1	1	3	2	1	4	4	8	2
OG0000440	1	3	3	4	2	0	6	2	5	1	1	0	1	6	3
OG0000441	1	3	6	3	14	0	6	0	0	3	1	0	0	1	0
OG0000442	2	2	2	2	7	4	3	2	1	5	1	2	1	3	1
OG0000443	2	3	4	4	2	3	1	2	2	2	3	3	2	3	2
OG0000444	3	0	0	0	0	4	3	4	0	3	6	1	4	7	3
OG0000445	2	3	3	3	2	4	3	3	2	1	2	2	3	2	3
OG0000446	2	3	3	4	12	0	1	1	1	4	2	1	1	2	1
OG0000447	2	1	0	4	6	0	1	0	0	11	6	0	0	7	0
OG0000448	1	3	3	3	2	1	6	4	2	3	1	3	2	2	2
OG0000449	3	3	2	3	1	8	1	3	1	2	2	2	3	2	2
OG0000450	1	1	0	0	1	19	6	2	2	0	0	0	3	0	3
OG0000451	3	3	5	0	3	2	1	9	0	0	1	0	2	5	4
OG0000452	1	1	3	4	4	2	2	4	1	4	3	1	2	4	2
OG0000453	2	3	6	3	4	7	2	1	2	1	1	0	1	3	2
OG0000454	1	0	5	0	2	6	3	5	1	6	0	0	5	4	0
OG0000455	0	0	0	2	2	5	2	6	0	1	0	0	4	8	8
OG0000456	0	0	0	0	22	2	0	1	0	1	0	3	0	9	0
OG0000457	0	0	0	0	0	0	0	0	7	0	0	0	0	0	31
OG0000458	4	3	2	2	1	2	6	1	2	2	4	1	3	2	2
OG0000459	1	2	2	2	2	6	2	2	2	2	2	2	2	6	2
OG0000460	5	2	3	3	3	1	2	3	1	3	2	3	2	3	1
OG0000461	1	3	2	3	2	1	1	9	1	2	1	4	4	2	1
OG0000462	2	2	2	2	4	3	2	2	2	3	2	3	2	4	2
OG0000463	3	3	2	4	1	2	3	3	3	2	3	1	3	1	3
OG0000464	2	2	2	2	3	1	5	2	2	4	3	2	2	3	2
OG0000465	2	3	3	3	4	2	2	2	2	4	2	1	2	2	3
OG0000466	3	2	3	3	3	3	2	2	2	2	2	1	4	3	2
OG0000467	8	4	2	3	2	1	3	1	3	1	2	0	3	1	3
OG0000468	2	3	2	3	2	2	2	2	2	2	7	2	2	2	2
OG0000469	2	2	2	2	3	2	3	3	3	2	2	1	3	4	3
OG0000470	2	3	2	2	2	3	3	2	2	3	2	2	3	3	3
OG0000471	2	1	1	1	6	3	1	2	2	2	1	2	6	5	2
OG0000472	1	2	2	1	1	7	1	2	3	3	4	2	2	3	3
OG0000473	0	1	36	0	0	0	0	0	0	0	0	0	0	0	0
OG0000474	0	0	0	0	0	37	0	0	0	0	0	0	0	0	0
OG0000475	1	2	3	2	1	2	3	2	5	2	3	3	2	2	3
OG0000476	1	1	1	1	4	0	1	1	5	6	1	0	2	10	2
OG0000477	2	2	2	2	7	2	2	2	3	3	2	1	2	1	3
OG0000478	3	3	9	4	4	1	0	4	1	2	1	0	1	0	3
OG0000479	4	1	2	3	1	0	4	1	1	1	2	4	0	11	1
OG0000480	1	1	3	4	7	3	1	2	1	5	1	2	1	3	1
OG0000481	3	1	1	1	4	3	3	2	2	4	3	1	1	5	2
OG0000482	3	2	2	2	2	1	4	2	3	4	2	2	2	2	3
OG0000483	2	3	3	3	6	0	2	3	2	2	1	4	2	1	2
OG0000484	1	6	6	4	1	3	3	1	3	1	1	1	1	1	3
OG0000485	2	2	3	2	2	2	4	2	2	3	2	1	4	3	2
OG0000486	5	3	4	3	0	0	3	1	3	1	7	0	1	1	4
OG0000487	3	2	7	5	0	0	4	0	5	0	4	1	0	0	5
OG0000488	2	2	6	3	4	4	0	1	1	3	2	2	2	3	1
OG0000489	1	0	0	1	3	3	1	3	0	3	1	7	4	9	0
OG0000490	3	2	2	3	2	3	2	2	3	2	2	2	2	2	4
OG0000491	4	2	2	2	4	3	2	1	2	4	1	1	3	3	2
OG0000492	2	2	2	2	3	4	2	2	2	3	2	3	2	3	2
OG0000493	3	2	2	2	1	2	2	2	1	2	2	3	4	6	2
OG0000494	1	0	0	1	12	0	5	2	1	6	1	0	4	2	1
OG0000495	3	3	1	3	2	3	2	2	2	3	1	3	2	4	2
OG0000496	2	2	4	3	1	3	3	2	2	5	2	3	1	1	2
OG0000497	2	1	9	2	3	3	2	4	0	3	0	4	0	0	3
OG0000498	1	4	5	7	2	3	1	1	1	1	4	1	1	2	2
OG0000499	0	2	0	0	3	6	4	2	6	3	0	0	4	0	6
OG0000500	0	0	2	1	13	5	1	1	0	3	0	1	0	9	0
OG0000501	0	0	0	0	0	0	0	36	0	0	0	0	0	0	0
OG0000502	0	0	0	0	0	0	0	0	1	0	0	0	0	0	35
OG0000503	2	2	2	2	2	7	2	1	3	1	2	2	3	1	3
OG0000504	1	1	1	1	1	21	1	1	1	1	1	1	1	1	1
OG0000505	2	5	2	2	1	1	2	4	3	3	2	1	2	2	3
OG0000506	2	3	3	3	1	1	2	5	4	1	2	2	1	1	4
OG0000507	1	3	2	2	2	7	2	2	1	4	2	2	2	2	1
OG0000508	1	3	4	2	1	1	5	0	4	1	1	2	2	2	6
OG0000509	3	3	3	3	3	2	0	3	0	3	3	3	3	3	0
OG0000510	1	1	1	0	1	22	1	1	1	1	1	1	1	1	1
OG0000511	3	2	1	1	2	3	2	4	2	4	3	4	1	0	3
OG0000512	4	2	1	2	4	5	0	0	2	7	1	1	1	2	3
OG0000513	1	1	1	1	7	1	2	1	1	4	1	0	1	12	1
OG0000514	10	1	3	2	1	1	2	4	2	2	1	1	3	1	1
OG0000515	2	1	1	1	2	10	5	1	3	3	1	1	1	1	2
OG0000516	2	4	4	4	0	0	1	0	5	0	5	0	1	0	9
OG0000517	4	3	1	1	3	0	5	0	1	8	2	0	3	3	1
OG0000518	1	6	4	2	2	1	3	2	1	2	3	1	3	1	3
OG0000519	3	2	2	2	2	3	0	3	3	2	2	2	2	4	3
OG0000520	0	0	0	0	4	0	0	0	0	1	0	0	0	30	0
OG0000521	0	0	0	0	1	6	10	9	2	0	0	0	5	0	2
OG0000522	0	0	0	0	3	12	0	2	0	9	1	2	2	4	0
OG0000523	0	0	0	0	0	0	0	0	0	0	0	35	0	0	0
OG0000524	2	2	3	2	3	1	2	1	3	4	2	2	1	3	3
OG0000525	2	2	2	2	1	3	2	1	1	3	2	2	2	7	2
OG0000526	3	2	2	2	2	1	2	2	2	2	2	1	2	7	2
OG0000527	1	2	2	2	2	7	2	2	2	2	2	2	2	2	2
OG0000528	2	3	6	3	0	0	2	5	4	0	1	0	3	0	5
OG0000529	2	4	2	3	1	1	5	3	1	1	5	1	0	2	3
OG0000530	1	2	3	2	3	5	4	1	1	3	2	2	2	2	1
OG0000531	5	2	2	3	2	2	2	2	2	2	2	2	2	2	2
OG0000532	4	2	2	2	3	0	1	6	1	0	4	0	2	2	5
OG0000533	3	2	2	2	2	0	3	2	2	3	4	0	2	5	2
OG0000534	2	2	2	4	2	2	2	3	2	2	2	2	2	2	3
OG0000535	2	2	3	2	2	4	1	3	2	2	2	3	2	2	2
OG0000536	3	0	1	0	1	5	0	1	1	1	0	9	4	5	3
OG0000537	1	1	1	1	2	15	1	1	2	1	1	1	1	1	4
OG0000538	2	3	2	2	2	2	4	2	2	2	2	3	2	2	2
OG0000539	5	2	3	2	2	0	4	1	3	2	2	2	2	1	3
OG0000540	3	3	2	3	1	0	4	2	2	2	3	0	2	2	5
OG0000541	2	2	3	2	1	1	2	2	2	6	3	2	1	3	2
OG0000542	1	5	3	3	0	2	0	1	5	0	5	0	3	0	6
OG0000543	2	3	0	2	4	4	3	0	0	6	0	4	0	1	5
OG0000544	1	0	2	2	6	2	5	0	0	10	0	0	3	3	0
OG0000545	0	1	4	2	1	1	4	13	0	0	2	0	0	2	4
OG0000546	0	1	0	1	0	0	6	0	5	0	0	0	1	0	20
OG0000547	0	2	2	1	5	1	2	2	1	6	2	3	4	2	1
OG0000548	0	0	4	0	0	16	12	0	0	0	0	0	1	1	0
OG0000549	2	4	2	2	3	2	2	1	2	4	2	0	3	2	2
OG0000550	2	3	2	2	3	1	2	2	2	2	2	4	2	2	2
OG0000551	2	2	1	7	0	0	2	2	3	1	3	0	1	5	4
OG0000552	1	2	2	2	1	0	1	1	10	1	1	0	1	1	9
OG0000553	2	3	4	3	1	0	3	1	2	3	3	3	0	2	3
OG0000554	2	1	1	1	4	3	4	3	2	2	3	2	1	2	2
OG0000555	2	5	5	4	1	1	4	1	2	1	1	2	1	1	2
OG0000556	2	3	4	3	1	1	1	3	3	0	3	3	1	0	5
OG0000557	1	0	0	0	1	0	0	27	0	1	1	0	0	1	1
OG0000558	2	3	2	4	1	1	2	2	1	6	2	1	2	2	2
OG0000559	4	2	1	1	2	4	1	2	3	1	2	3	2	2	3
OG0000560	3	2	2	3	3	6	0	0	0	3	0	5	0	1	5
OG0000561	2	2	3	3	2	1	4	2	2	2	2	2	2	1	3
OG0000562	5	2	6	3	3	2	1	1	1	3	1	1	1	2	1
OG0000563	1	3	5	4	2	0	1	2	2	4	2	0	3	1	3
OG0000564	1	0	0	0	3	3	1	5	3	2	1	5	3	3	3
OG0000565	1	2	2	2	3	2	2	3	2	5	1	2	1	3	2
OG0000566	3	2	2	2	1	0	9	1	3	1	3	0	2	1	3
OG0000567	1	2	2	2	3	3	2	2	2	2	1	4	2	2	3
OG0000568	1	3	3	4	2	4	2	2	2	1	2	3	1	1	2
OG0000569	0	2	3	3	3	0	0	2	1	7	1	4	1	5	1
OG0000570	0	2	2	13	0	13	0	0	0	2	0	0	1	0	0
OG0000571	0	1	5	6	7	0	0	1	0	7	0	0	0	6	0
OG0000572	0	1	4	0	16	0	3	0	0	0	1	0	0	5	3
OG0000573	0	0	8	2	1	5	2	1	0	3	0	0	6	5	0
OG0000574	0	0	0	0	33	0	0	0	0	0	0	0	0	0	0
OG0000575	0	0	0	0	33	0	0	0	0	0	0	0	0	0	0
OG0000576	0	0	0	0	0	0	0	0	0	0	0	33	0	0	0
OG0000577	4	3	2	4	1	1	4	1	2	1	2	2	1	1	3
OG0000578	2	2	2	2	2	2	2	4	2	2	2	2	2	2	2
OG0000579	2	2	2	2	2	1	2	2	2	5	2	2	2	2	2
OG0000580	1	1	1	1	5	1	1	4	1	5	2	0	1	7	1
OG0000581	2	2	2	2	1	3	1	3	3	1	3	2	3	1	3
OG0000582	3	2	2	2	3	0	3	1	3	2	4	1	1	2	3
OG0000583	3	2	4	3	2	1	1	1	3	1	2	1	3	2	3
OG0000584	2	2	2	2	2	4	2	2	2	3	1	2	2	2	2
OG0000585	1	2	3	2	2	2	2	2	2	3	2	1	2	3	3
OG0000586	2	1	1	2	0	5	1	1	2	5	4	1	2	3	2
OG0000587	2	4	4	3	3	1	2	1	2	2	2	1	1	2	2
OG0000588	3	2	3	3	5	1	0	5	3	1	1	1	1	1	2
OG0000589	1	2	2	2	1	0	2	1	5	3	2	0	2	1	8
OG0000590	3	3	3	3	2	1	2	1	2	3	2	2	1	2	2
OG0000591	2	1	3	1	0	5	1	0	1	0	1	12	2	0	3
OG0000592	3	3	3	3	2	2	1	3	1	0	2	1	3	4	1
OG0000593	4	2	1	3	2	1	1	1	5	1	3	2	3	1	2
OG0000594	2	2	2	6	3	1	2	2	1	2	1	3	1	2	2
OG0000595	3	2	1	3	6	1	3	2	0	1	3	1	3	3	0
OG0000596	1	2	2	2	7	0	3	1	2	5	1	0	1	2	3
OG0000597	3	2	3	2	1	1	4	2	2	2	3	1	2	2	2
OG0000598	3	2	3	1	1	3	3	2	2	2	2	2	2	2	2
OG0000599	3	2	2	2	2	5	0	1	0	2	3	4	3	3	0
OG0000600	1	1	2	1	2	4	2	1	8	1	1	2	1	1	4
OG0000601	3	1	2	1	2	1	2	1	2	2	4	4	2	2	3
OG0000602	2	2	2	2	2	3	2	2	2	2	2	2	2	3	2
OG0000603	1	2	0	1	1	1	0	4	0	2	0	15	0	5	0
OG0000604	0	5	2	1	4	8	0	7	0	0	0	3	2	0	0
OG0000605	0	3	3	7	0	2	0	4	0	1	5	0	5	2	0
OG0000606	0	1	1	8	4	12	0	0	0	2	1	0	0	3	0
OG0000607	0	1	4	6	2	7	1	0	0	4	0	1	1	5	0
OG0000608	0	4	4	23	0	0	1	0	0	0	0	0	0	0	0
OG0000609	0	0	1	1	0	6	5	1	0	1	1	1	4	4	7
OG0000610	0	0	0	0	1	0	1	23	2	2	0	0	1	1	1
OG0000611	0	0	0	0	32	0	0	0	0	0	0	0	0	0	0
OG0000612	0	0	0	0	0	30	0	0	0	0	0	2	0	0	0
OG0000613	0	0	0	0	0	19	0	0	0	0	0	13	0	0	0
OG0000614	0	0	0	0	0	0	0	0	0	0	0	32	0	0	0
OG0000615	0	0	0	0	0	0	0	0	0	0	0	32	0	0	0
OG0000616	2	2	2	2	2	2	2	2	1	2	2	2	3	3	2
OG0000617	2	3	2	2	0	1	2	2	3	4	2	2	1	2	3
OG0000618	1	1	2	1	1	0	3	9	3	1	3	0	2	1	3
OG0000619	5	0	0	0	0	0	0	3	0	0	3	0	20	0	0
OG0000620	1	1	1	1	2	5	2	2	1	2	1	8	1	2	1
OG0000621	1	2	2	2	2	1	5	1	3	1	4	0	2	2	3
OG0000622	3	2	2	2	1	4	2	3	2	1	2	2	1	2	2
OG0000623	2	3	2	2	3	1	2	2	2	3	2	1	2	2	2
OG0000624	2	2	6	3	1	1	2	1	2	1	3	1	1	3	2
OG0000625	2	2	2	2	3	2	2	2	2	2	2	2	2	2	2
OG0000626	2	2	2	3	1	3	3	1	3	1	2	2	1	1	4
OG0000627	2	2	3	2	0	1	2	1	2	0	6	0	5	0	5
OG0000628	4	2	2	2	3	0	3	3	2	2	2	0	1	2	3
OG0000629	1	2	2	1	6	1	1	3	2	5	1	0	1	3	2
OG0000630	3	3	5	4	1	2	1	1	2	0	2	1	2	1	3
OG0000631	2	4	4	3	1	1	3	1	2	1	4	0	2	1	2
OG0000632	1	1	2	2	9	1	1	1	1	4	1	1	2	2	2
OG0000633	1	2	2	2	2	3	2	2	2	2	2	3	2	2	2
OG0000634	3	2	3	2	2	0	2	2	3	1	3	1	2	2	3
OG0000635	1	2	4	4	1	4	3	1	2	2	2	1	1	1	2
OG0000636	2	2	2	2	2	5	2	1	2	2	2	2	2	2	1
OG0000637	3	0	2	0	1	0	3	3	0	3	1	3	0	7	5
OG0000638	3	1	1	1	3	5	3	5	2	1	0	1	2	1	2
OG0000639	1	2	2	1	2	0	3	4	2	3	3	2	2	2	2
OG0000640	1	1	1	1	1	17	1	1	1	1	1	1	1	1	1
OG0000641	2	2	3	2	5	1	2	1	2	1	3	2	1	2	2
OG0000642	3	3	6	6	1	1	2	1	1	1	2	1	1	1	1
OG0000643	1	2	2	2	1	3	3	2	2	3	2	1	2	3	2
OG0000644	1	0	5	3	2	3	4	0	0	0	2	0	7	4	0
OG0000645	1	0	9	1	2	3	2	1	0	3	0	0	4	5	0
OG0000646	0	31	0	0	0	0	0	0	0	0	0	0	0	0	0
OG0000647	0	2	2	2	3	1	4	2	2	4	2	1	2	3	1
OG0000648	0	2	3	2	4	6	2	2	0	1	1	2	3	2	1
OG0000649	0	3	3	2	2	0	3	3	2	4	2	4	0	2	1
OG0000650	0	1	1	1	2	0	1	5	0	0	1	17	2	0	0
OG0000651	0	0	7	2	2	0	0	2	2	9	0	0	1	4	2
OG0000652	0	0	0	2	1	4	8	0	1	4	1	0	2	2	6
OG0000653	0	0	0	0	4	0	0	0	0	11	0	0	0	16	0
OG0000654	0	0	0	0	0	0	0	0	0	0	31	0	0	0	0
OG0000655	2	2	2	2	1	2	2	1	2	2	2	4	2	2	2
OG0000656	2	3	2	2	1	0	1	5	2	3	1	0	1	2	5
OG0000657	2	2	2	2	2	2	2	2	2	2	2	2	2	2	2
OG0000658	3	2	3	2	2	0	3	2	2	0	5	0	3	1	2
OG0000659	2	2	3	3	1	2	2	2	1	2	2	2	3	2	1
OG0000660	2	2	2	2	2	1	2	2	2	3	2	3	1	2	2
OG0000661	4	1	4	2	2	0	1	0	5	0	5	0	1	0	5
OG0000662	2	2	2	2	2	2	2	2	2	2	2	2	2	2	2
OG0000663	2	2	2	2	2	3	2	1	2	2	2	2	2	2	2
OG0000664	1	2	3	2	1	0	2	2	2	4	2	1	2	3	3
OG0000665	3	3	2	2	3	3	2	2	1	2	1	1	2	2	1
OG0000666	2	2	2	2	2	1	2	2	2	3	2	1	3	2	2
OG0000667	2	1	1	1	2	1	2	3	1	4	0	5	3	3	1
OG0000668	1	2	2	2	5	2	1	3	1	2	2	4	1	1	1
OG0000669	3	2	2	3	3	2	2	0	0	3	1	1	2	5	1
OG0000670	2	2	2	2	2	1	3	2	1	2	2	2	2	3	2
OG0000671	2	3	2	2	2	1	2	1	1	2	2	3	2	3	2
OG0000672	1	2	1	5	0	5	7	1	1	1	1	2	1	1	1
OG0000673	4	4	2	2	1	1	3	1	4	1	1	1	1	1	3
OG0000674	2	2	2	2	1	1	4	3	2	2	2	1	3	1	2
OG0000675	2	2	2	2	1	4	2	2	2	1	1	3	2	3	1
OG0000676	5	2	2	2	2	5	2	1	1	1	2	1	2	1	1
OG0000677	2	3	2	3	1	0	3	1	3	1	3	2	2	1	3
OG0000678	1	1	1	2	1	1	1	1	1	2	1	11	2	3	1
OG0000679	2	6	2	3	0	0	1	2	1	0	8	0	5	0	0
OG0000680	2	2	2	2	2	3	2	2	2	1	2	2	2	2	2
OG0000681	2	3	2	2	4	0	2	3	1	3	1	0	1	5	1
OG0000682	2	2	2	2	2	0	3	2	3	3	2	1	1	2	3
OG0000683	1	0	7	1	5	0	2	2	0	2	0	0	3	7	0
OG0000684	1	0	2	2	4	14	0	0	0	2	1	0	1	2	1
OG0000685	0	9	8	0	9	0	0	1	0	0	2	0	0	1	0
OG0000686	0	3	5	22	0	0	0	0	0	0	0	0	0	0	0
OG0000687	0	1	2	3	3	5	1	2	0	4	1	4	1	3	0
OG0000688	0	1	7	22	0	0	0	0	0	0	0	0	0	0	0
OG0000689	0	0	30	0	0	0	0	0	0	0	0	0	0	0	0
OG0000690	0	0	9	3	1	2	0	1	0	4	0	0	3	7	0
OG0000691	0	0	1	1	0	0	28	0	0	0	0	0	0	0	0
OG0000692	0	0	1	2	7	0	12	1	1	1	0	0	2	2	1
OG0000693	0	0	0	0	1	29	0	0	0	0	0	0	0	0	0
OG0000694	0	0	0	0	7	0	0	0	0	23	0	0	0	0	0
OG0000695	0	0	0	0	0	30	0	0	0	0	0	0	0	0	0
OG0000696	0	0	0	0	0	27	0	0	0	0	0	0	3	0	0
OG0000697	0	0	0	0	0	2	0	0	2	0	21	0	1	0	4
OG0000698	0	0	0	0	0	28	0	0	0	0	0	1	1	0	0
OG0000699	0	0	0	0	0	30	0	0	0	0	0	0	0	0	0
OG0000700	0	0	0	0	0	1	12	13	0	2	0	0	1	0	1
OG0000701	0	0	0	0	0	0	30	0	0	0	0	0	0	0	0
OG0000702	0	0	0	0	0	0	0	0	0	0	0	30	0	0	0
OG0000703	0	0	0	0	0	0	0	0	0	0	0	30	0	0	0
OG0000704	1	1	2	3	4	3	1	1	1	3	1	4	1	1	2
OG0000705	2	2	2	2	2	1	2	2	2	3	2	1	2	2	2
OG0000706	1	5	7	5	0	0	2	0	1	2	2	0	0	2	2
OG0000707	1	5	2	3	1	0	1	4	1	1	1	0	6	2	1
OG0000708	1	1	1	0	1	16	1	1	1	1	1	1	1	1	1
OG0000709	2	2	2	2	2	2	1	4	1	2	2	2	2	2	1
OG0000710	2	1	2	2	2	3	2	2	2	1	2	2	2	2	2
OG0000711	3	3	3	3	1	1	2	2	2	1	2	1	2	1	2
OG0000712	1	1	7	1	4	1	0	1	4	1	2	1	1	1	3
OG0000713	3	4	2	5	1	1	1	1	1	2	2	2	2	1	1
OG0000714	2	2	2	3	2	2	2	2	2	1	1	2	2	2	2
OG0000715	2	2	2	3	2	1	2	1	3	2	2	2	1	2	2
OG0000716	2	2	1	3	3	0	2	5	1	2	2	1	3	1	1
OG0000717	1	1	2	3	1	5	2	1	2	1	1	5	1	1	2
OG0000718	2	3	2	1	2	2	1	2	1	3	2	1	2	3	2
OG0000719	2	2	2	2	2	2	2	2	2	2	2	2	1	2	2
OG0000720	1	1	1	1	1	7	1	1	2	2	1	1	1	1	7
OG0000721	2	0	4	2	1	0	0	7	0	7	0	2	0	4	0
OG0000722	2	2	2	2	2	1	2	2	2	2	2	1	3	2	2
OG0000723	2	2	1	1	1	5	2	1	1	3	1	2	3	3	1
OG0000724	2	2	2	3	2	2	2	2	1	2	2	2	2	1	2
OG0000725	3	2	2	2	2	1	2	2	1	2	4	1	2	2	1
OG0000726	1	1	1	1	1	0	1	1	15	1	2	1	1	1	1
OG0000727	1	2	2	2	6	0	1	2	3	2	1	0	1	3	3
OG0000728	3	3	3	1	0	0	1	0	3	0	2	2	6	0	5
OG0000729	2	1	1	1	2	3	2	2	1	2	3	3	3	2	1
OG0000730	2	2	2	2	2	1	3	1	3	2	1	3	1	1	3
OG0000731	5	2	2	3	1	1	2	1	3	1	4	0	0	1	3
OG0000732	1	6	6	4	0	0	0	2	1	0	2	3	3	0	1
OG0000733	1	1	1	1	1	1	1	1	6	1	1	1	1	1	10
OG0000734	1	2	1	1	4	2	1	3	1	3	1	3	1	3	2
OG0000735	1	2	2	2	1	2	3	1	3	1	1	2	3	2	3
OG0000736	1	2	2	1	1	4	2	2	1	3	2	0	2	5	1
OG0000737	2	3	2	10	0	0	0	1	3	2	1	0	2	1	2
OG0000738	2	2	2	1	2	4	2	1	2	2	1	2	2	2	2
OG0000739	1	2	3	2	0	1	2	6	2	1	2	1	4	1	1
OG0000740	1	1	5	0	1	0	4	10	0	1	0	0	0	5	1
OG0000741	1	10	1	2	3	2	1	1	0	1	2	0	0	4	1
OG0000742	0	3	11	10	0	0	0	0	0	0	0	4	0	1	0
OG0000743	0	2	2	2	1	1	2	3	2	3	2	2	1	3	3
OG0000744	0	1	3	1	4	1	1	1	1	5	0	7	0	3	1
OG0000745	0	0	29	0	0	0	0	0	0	0	0	0	0	0	0
OG0000746	0	0	5	0	8	0	0	0	0	4	0	3	0	9	0
OG0000747	0	0	5	2	0	0	4	0	0	0	1	7	3	7	0
OG0000748	0	0	0	0	24	0	0	1	0	3	0	0	0	1	0
OG0000749	0	0	0	0	10	0	0	0	0	8	0	0	0	11	0
OG0000750	0	0	0	0	29	0	0	0	0	0	0	0	0	0	0
OG0000751	0	0	0	0	0	28	0	0	0	0	0	1	0	0	0
OG0000752	0	0	0	0	0	0	0	0	7	0	0	0	0	0	22
OG0000753	1	3	9	3	2	0	2	3	0	2	1	1	0	1	0
OG0000754	2	2	2	2	2	1	2	2	2	2	2	0	3	2	2
OG0000755	1	2	2	2	1	2	2	2	2	2	2	2	2	2	2
OG0000756	2	5	4	2	3	0	2	2	2	1	2	0	1	1	1
OG0000757	1	1	1	1	1	13	1	1	1	1	2	1	1	1	1
OG0000758	2	2	2	2	2	1	2	2	2	2	2	1	2	2	2
OG0000759	1	1	1	1	1	12	1	2	1	2	1	1	1	1	1
OG0000760	2	2	1	2	2	2	2	2	2	3	1	1	2	2	2
OG0000761	2	2	2	2	2	1	2	2	1	2	2	2	2	2	2
OG0000762	2	2	2	2	1	2	2	2	2	2	2	1	2	2	2
OG0000763	2	2	2	2	1	2	2	2	1	2	2	2	2	2	2
OG0000764	1	2	4	2	3	2	2	1	2	2	2	1	0	2	2
OG0000765	1	1	1	1	1	2	8	1	1	4	2	1	1	1	2
OG0000766	2	2	2	2	2	1	1	1	3	2	1	4	1	1	3
OG0000767	2	2	2	2	2	2	2	2	2	2	2	0	2	2	2
OG0000768	2	3	3	2	2	0	1	5	1	3	1	0	2	2	1
OG0000769	1	2	3	1	1	0	3	1	4	1	1	1	4	1	4
OG0000770	2	2	4	3	3	1	3	0	1	4	1	0	1	2	1
OG0000771	2	2	2	2	1	0	2	1	6	1	2	0	2	1	4
OG0000772	2	2	2	2	1	1	2	1	2	1	3	5	1	1	2
OG0000773	1	1	1	1	2	8	1	1	1	3	1	3	1	2	1
OG0000774	1	1	2	1	4	3	2	3	0	3	2	1	0	3	2
OG0000775	9	2	1	2	1	0	1	0	0	3	6	0	2	1	0
OG0000776	2	2	2	2	2	1	2	3	2	2	2	1	1	2	2
OG0000777	2	1	1	1	0	6	3	8	1	0	3	0	1	0	1
OG0000778	1	1	3	2	0	5	1	1	1	0	2	1	5	2	3
OG0000779	2	2	2	2	2	0	2	2	2	3	2	1	2	2	2
OG0000780	1	0	0	0	1	6	3	0	8	1	3	1	1	1	2
OG0000781	2	1	2	2	1	1	3	0	2	1	4	1	2	3	3
OG0000782	3	2	1	1	3	1	2	2	3	2	1	1	1	2	3
OG0000783	1	1	1	1	2	7	3	1	1	2	1	2	1	3	1
OG0000784	1	1	3	2	4	0	5	0	1	2	4	0	1	3	1
OG0000785	1	3	2	2	1	3	2	1	2	3	1	1	2	2	2
OG0000786	1	1	1	1	1	6	0	0	0	1	2	4	8	1	1
OG0000787	10	0	0	0	1	1	1	7	0	1	2	0	3	1	1
OG0000788	0	1	0	3	0	6	0	1	0	3	1	0	10	3	0
OG0000789	0	3	4	5	0	0	2	4	1	0	4	0	3	0	2
OG0000790	0	2	1	3	3	7	3	1	1	1	0	2	3	1	0
OG0000791	0	4	0	0	0	0	2	0	9	1	0	0	0	1	11
OG0000792	0	2	7	6	0	0	0	7	0	0	3	0	0	3	0
OG0000793	0	4	3	0	3	0	0	1	0	2	4	1	0	9	1
OG0000794	0	1	9	1	4	4	1	0	0	2	0	2	2	2	0
OG0000795	0	1	1	1	1	1	3	1	6	1	2	1	1	1	7
OG0000796	0	1	1	0	22	1	1	0	0	0	0	2	0	0	0
OG0000797	0	3	5	3	9	1	0	0	0	2	0	5	0	0	0
OG0000798	0	0	2	4	0	9	5	1	0	3	0	1	1	0	2
OG0000799	0	0	0	0	1	0	0	0	0	0	0	0	26	1	0
OG0000800	0	0	0	0	11	0	0	0	0	6	0	2	0	9	0
OG0000801	0	0	0	0	0	23	4	0	0	0	0	0	1	0	0
OG0000802	0	0	0	0	0	0	0	28	0	0	0	0	0	0	0
OG0000803	0	0	0	0	0	0	0	0	0	0	0	28	0	0	0
OG0000804	0	0	0	0	0	0	0	0	0	0	0	28	0	0	0
OG0000805	2	3	2	2	0	1	2	1	3	1	3	2	1	1	3
OG0000806	2	1	3	2	1	1	1	3	1	1	2	1	1	6	1
OG0000807	6	1	1	2	1	2	1	2	1	1	4	1	1	1	2
OG0000808	2	0	6	4	8	0	2	2	0	1	0	1	1	0	0
OG0000809	1	1	1	1	1	11	1	1	1	1	1	1	1	3	1
OG0000810	6	0	0	0	0	0	0	1	2	0	12	0	1	0	5
OG0000811	2	3	3	2	6	0	2	2	1	1	1	1	1	1	1
OG0000812	1	2	2	1	3	1	4	1	1	3	2	1	1	3	1
OG0000813	3	3	2	3	1	0	4	2	1	1	3	3	0	1	0
OG0000814	2	1	2	2	2	1	3	1	2	2	1	2	2	2	2
OG0000815	2	2	3	3	1	0	2	4	1	2	2	0	0	4	1
OG0000816	2	1	1	1	1	0	1	4	1	1	7	4	1	1	1
OG0000817	2	2	1	2	1	3	2	2	1	2	2	2	2	2	1
OG0000818	2	2	2	2	2	1	2	2	1	2	1	1	2	4	1
OG0000819	2	2	2	3	1	0	1	1	4	1	2	1	2	1	4
OG0000820	2	2	2	2	2	0	1	1	2	2	2	3	0	4	2
OG0000821	1	1	1	1	4	1	1	1	1	4	1	1	1	7	1
OG0000822	1	2	1	4	16	0	0	0	0	2	0	0	0	1	0
OG0000823	3	1	3	3	1	1	1	3	1	1	2	3	1	2	1
OG0000824	2	2	2	2	2	1	2	4	1	2	2	1	1	2	1
OG0000825	2	2	2	2	1	1	2	2	2	2	2	1	2	2	2
OG0000826	1	1	2	2	2	2	2	1	2	2	2	2	2	2	2
OG0000827	1	3	3	2	1	1	1	1	1	1	1	1	7	2	1
OG0000828	1	0	0	0	4	8	1	0	0	5	1	0	2	5	0
OG0000829	1	0	0	1	2	4	3	2	3	1	1	1	3	2	3
OG0000830	1	2	2	1	2	3	2	1	1	5	1	1	1	3	1
OG0000831	2	1	2	1	2	2	2	2	2	2	2	2	1	2	2
OG0000832	1	2	4	1	2	4	1	1	1	1	1	4	1	2	1
OG0000833	2	1	2	2	2	0	2	4	2	3	1	0	2	2	2
OG0000834	3	0	1	1	4	0	1	3	2	5	1	0	1	4	1
OG0000835	1	1	1	1	4	1	1	2	1	2	1	1	6	3	1
OG0000836	3	4	4	3	1	0	0	3	2	2	2	0	0	1	2
OG0000837	6	1	1	2	1	1	3	3	1	1	1	3	1	1	1
OG0000838	2	0	3	1	0	5	2	0	1	4	0	0	4	2	3
OG0000839	1	1	2	1	1	0	7	1	3	2	1	1	1	3	2
OG0000840	7	0	0	0	2	5	0	0	0	3	2	0	3	5	0
OG0000841	1	1	8	1	1	3	2	4	0	0	0	5	0	0	1
OG0000842	1	0	2	4	0	4	0	0	0	2	1	1	3	2	7
OG0000843	0	27	0	0	0	0	0	0	0	0	0	0	0	0	0
OG0000844	0	2	5	1	7	3	0	1	0	4	0	2	2	0	0
OG0000845	0	1	2	1	0	1	2	4	5	0	0	0	5	0	6
OG0000846	0	10	6	5	0	0	2	0	1	0	1	2	0	0	0
OG0000847	0	2	0	2	0	7	3	0	2	3	0	1	4	1	2
OG0000848	0	7	1	1	3	1	2	3	2	0	2	0	1	2	2
OG0000849	0	0	2	1	0	0	0	1	0	0	0	0	20	3	0
OG0000850	0	0	0	2	0	19	0	0	1	0	0	1	2	0	2
OG0000851	0	0	0	0	27	0	0	0	0	0	0	0	0	0	0
OG0000852	0	0	0	0	10	6	0	2	0	5	0	2	1	1	0
OG0000853	0	0	0	0	0	27	0	0	0	0	0	0	0	0	0
OG0000854	0	0	0	0	0	1	0	0	0	0	0	26	0	0	0
OG0000855	0	0	0	0	0	27	0	0	0	0	0	0	0	0	0
OG0000856	0	0	0	0	0	0	0	27	0	0	0	0	0	0	0
OG0000857	0	0	0	0	0	0	0	0	0	4	0	0	0	23	0
OG0000858	0	0	0	0	0	0	0	0	0	0	27	0	0	0	0
OG0000859	1	5	2	2	1	1	1	1	1	1	1	6	1	1	1
OG0000860	2	1	1	1	2	1	2	1	2	2	2	3	2	1	3
OG0000861	1	2	2	2	2	1	3	2	1	2	1	1	3	2	1
OG0000862	1	1	1	1	2	1	4	1	4	1	2	1	2	1	3
OG0000863	1	2	2	1	1	2	2	3	2	2	1	2	2	2	1
OG0000864	2	2	2	3	1	0	2	2	2	2	2	0	2	2	2
OG0000865	3	1	1	1	3	0	2	1	2	2	2	0	2	4	2
OG0000866	1	0	0	1	3	2	0	3	4	3	1	1	2	2	3
OG0000867	4	7	4	2	0	0	0	2	1	0	3	0	2	0	1
OG0000868	1	1	1	1	1	11	1	1	1	1	1	1	1	1	2
OG0000869	3	1	0	2	4	1	1	1	2	3	2	1	1	1	3
OG0000870	1	0	0	0	0	0	0	24	1	0	0	0	0	0	0
OG0000871	2	2	2	1	2	2	3	2	0	2	1	1	2	2	2
OG0000872	2	2	2	4	1	1	2	1	1	2	2	1	1	3	1
OG0000873	1	1	1	1	1	12	1	2	0	1	1	1	1	1	1
OG0000874	1	2	2	2	4	1	1	1	1	4	1	1	1	3	1
OG0000875	1	1	2	1	2	5	1	1	1	3	1	1	1	4	1
OG0000876	1	2	2	2	1	3	2	2	2	1	2	0	2	2	2
OG0000877	1	1	1	2	3	1	1	1	1	5	1	1	1	3	3
OG0000878	2	2	2	2	1	0	2	1	4	1	2	1	2	1	3
OG0000879	1	2	7	2	1	1	0	0	3	1	2	1	1	1	3
OG0000880	2	1	1	1	1	2	1	3	2	1	2	5	1	1	2
OG0000881	3	2	2	4	3	0	1	1	1	1	1	2	2	1	2
OG0000882	1	2	2	2	1	4	3	1	2	1	2	1	1	1	2
OG0000883	2	2	2	2	1	1	2	1	2	1	2	1	4	1	2
OG0000884	2	1	2	2	4	2	1	1	1	2	1	3	1	2	1
OG0000885	2	1	2	2	1	1	4	2	2	1	1	1	2	1	3
OG0000886	2	2	2	2	0	0	3	1	2	1	2	2	2	3	2
OG0000887	1	1	1	1	2	2	2	2	2	2	1	3	2	3	1
OG0000888	4	1	2	3	1	1	1	1	1	2	1	2	2	1	3
OG0000889	1	1	1	1	2	2	3	2	2	2	2	2	1	2	2
OG0000890	1	1	1	1	5	0	3	2	2	2	1	2	1	2	2
OG0000891	1	1	1	2	4	3	3	1	1	2	2	1	1	2	1
OG0000892	1	3	3	1	1	2	2	3	1	2	1	1	1	3	1
OG0000893	2	1	3	2	2	0	4	0	1	1	1	0	3	4	2
OG0000894	1	4	2	3	2	1	2	2	0	1	1	2	2	3	0
OG0000895	1	2	3	2	3	1	0	0	1	4	1	3	2	2	1
OG0000896	1	2	4	5	1	2	0	0	0	1	3	0	6	0	1
OG0000897	1	2	3	2	0	6	2	1	1	0	1	1	6	0	0
OG0000898	0	1	1	1	1	1	4	3	3	1	2	3	1	1	3
OG0000899	0	0	2	6	6	7	0	0	0	2	0	1	2	0	0
OG0000900	0	0	1	4	5	4	2	0	1	2	0	0	6	0	1
OG0000901	0	0	0	0	5	10	0	1	0	6	0	0	0	4	0
OG0000902	0	0	0	0	26	0	0	0	0	0	0	0	0	0	0
OG0000903	0	0	0	0	4	0	0	8	1	4	1	1	6	0	1
OG0000904	0	0	0	0	0	0	26	0	0	0	0	0	0	0	0
OG0000905	1	2	2	2	2	1	2	2	2	2	1	1	1	2	2
OG0000906	1	2	2	2	2	2	2	2	1	2	1	2	2	1	1
OG0000907	2	3	3	3	1	1	2	1	2	1	1	1	1	1	2
OG0000908	1	1	1	1	0	0	2	2	6	1	1	1	2	1	5
OG0000909	1	2	2	2	1	3	2	1	2	2	1	1	1	2	2
OG0000910	1	2	2	2	2	2	1	2	1	2	1	1	2	2	2
OG0000911	1	2	2	2	2	1	3	2	1	2	1	1	2	1	2
OG0000912	2	2	2	2	1	1	2	1	2	1	2	1	3	1	2
OG0000913	2	1	1	1	2	2	3	3	1	2	2	0	2	2	1
OG0000914	2	0	2	1	3	4	1	2	2	1	1	3	1	1	1
OG0000915	1	2	3	2	1	1	3	1	1	2	2	2	1	2	1
OG0000916	1	1	1	1	1	5	1	1	2	1	4	1	0	4	1
OG0000917	1	2	1	1	1	3	1	3	2	1	1	2	3	2	1
OG0000918	3	1	1	2	2	0	1	2	2	1	3	0	1	2	4
OG0000919	3	2	1	2	1	1	3	2	2	0	1	1	2	2	2
OG0000920	8	2	0	5	0	0	2	1	1	0	3	0	0	0	3
OG0000921	3	2	2	4	1	2	2	2	1	1	1	1	1	1	1
OG0000922	2	1	1	1	3	5	2	1	1	1	2	1	2	1	1
OG0000923	2	2	1	2	1	1	3	1	2	2	1	1	2	2	2
OG0000924	2	2	3	6	1	1	2	1	1	1	1	1	1	1	1
OG0000925	1	0	1	1	3	4	1	1	1	1	1	2	1	6	1
OG0000926	1	2	2	1	1	3	2	1	1	1	2	4	1	1	2
OG0000927	4	1	1	3	2	0	1	1	3	2	1	0	1	2	3
OG0000928	2	3	2	1	1	2	3	2	1	2	1	1	1	2	1
OG0000929	2	1	1	1	3	0	3	2	1	5	2	0	1	2	1
OG0000930	1	2	5	3	1	1	0	2	2	2	1	1	1	1	2
OG0000931	1	1	1	1	6	2	1	2	1	2	1	2	1	2	1
OG0000932	4	3	1	1	1	0	1	3	2	1	3	0	2	1	2
OG0000933	1	1	1	5	1	10	2	0	0	1	1	0	0	1	1
OG0000934	1	2	2	1	2	1	2	2	1	2	1	1	2	5	0
OG0000935	1	2	2	3	1	0	1	3	1	2	2	0	3	2	2
OG0000936	3	3	1	2	2	0	2	1	1	2	1	2	1	2	2
OG0000937	1	2	1	2	2	1	2	2	1	2	2	1	2	2	2
OG0000938	1	1	1	1	5	4	1	1	3	1	1	1	1	1	2
OG0000939	2	1	1	1	1	8	1	2	1	1	1	1	2	1	1
OG0000940	1	1	2	1	2	2	1	0	2	1	6	2	1	1	2
OG0000941	2	2	2	2	2	1	2	1	2	1	1	2	1	2	2
OG0000942	2	6	1	3	1	0	1	2	1	1	2	1	1	1	2
OG0000943	1	2	1	1	1	4	1	2	1	1	1	5	1	2	1
OG0000944	1	2	2	2	1	1	2	1	3	1	1	2	3	1	2
OG0000945	2	2	2	2	2	2	2	1	2	1	2	1	1	1	2
OG0000946	3	1	1	2	1	0	1	1	3	1	3	1	2	2	3
OG0000947	1	2	1	3	1	6	1	1	1	1	1	2	2	1	1
OG0000948	1	1	1	1	2	2	2	2	2	2	1	3	2	2	1
OG0000949	2	2	2	2	1	1	2	3	2	1	2	1	1	1	2
OG0000950	1	2	3	2	3	1	1	1	1	1	0	3	2	3	1
OG0000951	1	2	2	2	2	1	2	2	2	1	2	1	2	1	2
OG0000952	1	1	1	1	1	10	2	1	1	1	1	1	1	1	1
OG0000953	1	1	1	1	3	4	2	1	1	2	2	2	1	2	1
OG0000954	1	1	1	2	3	2	1	2	1	2	1	2	3	2	1
OG0000955	2	2	4	1	2	0	4	2	0	2	3	1	2	0	0
OG0000956	1	2	1	1	2	1	2	2	1	4	1	1	2	3	1
OG0000957	2	1	1	1	1	0	1	3	4	1	2	0	1	3	4
OG0000958	1	3	3	3	1	3	1	1	1	3	1	1	1	1	1
OG0000959	2	1	4	3	1	1	2	1	1	2	1	1	1	3	1
OG0000960	1	2	2	1	1	2	3	1	1	3	1	2	1	3	1
OG0000961	1	2	3	3	1	0	1	2	1	3	1	3	2	1	1
OG0000962	1	2	3	2	2	0	1	1	4	1	2	0	2	1	3
OG0000963	1	3	2	2	2	0	4	3	0	2	0	4	1	1	0
OG0000964	1	1	2	1	1	4	1	2	1	5	1	1	2	1	1
OG0000965	1	4	2	5	1	1	2	1	1	1	1	1	1	2	1
OG0000966	0	8	7	10	0	0	0	0	0	0	0	0	0	0	0
OG0000967	0	0	9	2	0	0	0	0	0	0	0	0	0	14	0
OG0000968	0	0	8	5	0	0	0	10	0	0	0	0	2	0	0
OG0000969	0	0	4	1	3	1	7	1	0	0	0	5	2	1	0
OG0000970	0	0	0	2	0	8	1	3	0	2	2	2	4	1	0
OG0000971	0	0	0	25	0	0	0	0	0	0	0	0	0	0	0
OG0000972	0	0	0	0	25	0	0	0	0	0	0	0	0	0	0
OG0000973	0	0	0	0	2	1	0	2	0	9	1	0	5	5	0
OG0000974	0	0	0	0	0	25	0	0	0	0	0	0	0	0	0
OG0000975	0	0	0	0	0	25	0	0	0	0	0	0	0	0	0
OG0000976	0	0	0	0	0	25	0	0	0	0	0	0	0	0	0
OG0000977	0	0	0	0	0	16	2	0	0	0	0	0	4	1	2
OG0000978	0	0	0	0	0	7	0	0	0	0	0	1	17	0	0
OG0000979	0	0	0	0	0	0	4	0	21	0	0	0	0	0	0
OG0000980	0	0	0	0	0	0	25	0	0	0	0	0	0	0	0
OG0000981	0	0	0	0	0	0	0	0	0	0	0	25	0	0	0
OG0000982	0	0	0	0	0	0	0	0	0	0	0	25	0	0	0
OG0000983	3	1	3	1	2	1	0	2	0	2	2	1	5	1	0
OG0000984	5	0	0	0	0	0	0	6	0	8	2	0	0	3	0
OG0000985	2	1	1	1	1	2	2	1	2	1	2	2	2	1	3
OG0000986	1	1	2	1	4	1	3	2	1	1	2	2	1	1	1
OG0000987	1	1	1	1	5	1	1	4	1	4	1	1	1	0	1
OG0000988	2	2	2	2	1	1	2	1	2	1	2	1	2	1	2
OG0000989	2	2	2	4	1	1	1	1	1	1	1	1	1	4	1
OG0000990	1	1	1	1	2	1	1	2	1	5	1	3	2	1	1
OG0000991	1	2	2	2	1	2	2	1	2	1	2	2	1	1	2
OG0000992	1	2	2	2	3	2	1	2	1	1	1	0	2	3	1
OG0000993	2	1	1	1	1	1	3	2	2	2	1	1	2	2	2
OG0000994	2	1	1	2	1	1	3	2	2	1	1	1	3	1	2
OG0000995	1	2	1	1	3	1	4	1	1	2	1	3	1	1	1
OG0000996	2	3	2	2	1	1	2	1	2	1	1	1	2	1	2
OG0000997	1	1	0	0	3	2	0	0	4	5	1	0	0	3	4
OG0000998	1	1	1	1	4	1	2	2	1	1	1	2	2	2	2
OG0000999	1	1	0	2	2	3	1	0	0	3	0	6	4	1	0
OG0001000	1	1	1	1	2	1	1	7	1	2	1	1	2	1	1
OG0001001	1	2	0	1	2	1	3	3	1	3	2	2	1	1	1
OG0001002	1	1	1	1	5	2	1	2	1	3	1	1	1	2	1
OG0001003	1	2	3	3	1	0	2	1	1	1	1	1	2	3	2
OG0001004	1	1	1	1	1	2	1	2	1	2	1	5	2	2	1
OG0001005	2	1	1	2	3	2	2	2	1	1	1	2	2	1	1
OG0001006	1	4	4	2	2	1	1	1	1	1	1	1	2	1	1
OG0001007	2	2	2	1	2	2	1	2	0	2	1	2	2	2	1
OG0001008	1	1	1	1	3	1	1	3	1	2	1	1	1	5	1
OG0001009	1	1	2	0	1	1	3	3	3	1	1	1	1	2	3
OG0001010	3	3	2	2	2	1	1	1	1	1	3	1	1	1	1
OG0001011	1	4	1	7	0	2	1	0	0	1	1	5	0	0	1
OG0001012	2	2	1	1	2	0	1	2	1	5	1	0	0	4	2
OG0001013	2	2	2	2	1	1	2	2	2	1	2	1	1	1	2
OG0001014	2	2	1	2	2	2	1	2	1	1	1	3	2	1	1
OG0001015	1	1	1	1	2	4	1	3	1	3	1	1	1	2	1
OG0001016	2	1	2	1	4	2	0	2	1	1	1	2	1	3	1
OG0001017	2	2	2	2	1	1	2	1	2	1	2	1	2	1	2
OG0001018	1	2	2	2	3	1	1	1	1	5	1	1	1	1	1
OG0001019	1	2	2	2	1	1	2	1	1	1	1	5	2	1	1
OG0001020	2	1	1	0	7	1	0	2	0	3	0	1	2	2	2
OG0001021	1	1	1	2	1	8	1	1	1	1	1	1	1	2	1
OG0001022	1	1	2	4	1	2	3	1	2	0	1	1	1	1	3
OG0001023	2	2	2	2	1	1	1	2	2	2	1	1	2	2	1
OG0001024	2	1	1	1	1	0	0	8	0	1	4	0	4	0	1
OG0001025	2	1	2	1	1	1	1	1	2	2	3	2	1	1	3
OG0001026	1	1	1	1	1	2	3	1	4	1	1	1	3	1	2
OG0001027	1	2	2	2	2	0	2	2	1	2	2	1	2	2	1
OG0001028	2	1	4	2	0	3	2	0	1	0	6	2	0	0	1
OG0001029	1	1	1	1	5	0	1	1	1	5	1	0	2	3	1
OG0001030	2	2	2	2	1	2	2	1	2	2	1	1	1	1	2
OG0001031	1	0	0	0	4	1	2	1	2	2	1	1	1	5	3
OG0001032	1	1	2	1	1	4	2	1	1	1	3	1	1	2	2
OG0001033	0	4	9	9	0	0	0	0	0	0	2	0	0	0	0
OG0001034	0	2	2	2	2	2	0	3	0	2	0	6	0	3	0
OG0001035	0	1	1	1	1	9	1	1	1	1	2	1	2	1	1
OG0001036	0	1	0	13	0	0	5	0	0	0	3	0	2	0	0
OG0001037	0	1	1	0	2	4	2	9	0	0	1	0	1	2	1
OG0001038	0	0	1	0	0	8	6	0	0	4	0	4	0	1	0
OG0001039	0	0	7	0	0	3	0	2	0	4	0	0	2	6	0
OG0001040	0	0	2	1	0	5	1	0	0	3	1	3	1	4	3
OG0001041	0	0	1	1	0	18	0	0	0	0	0	0	0	4	0
OG0001042	0	0	0	6	1	0	0	0	0	3	0	2	2	7	3
OG0001043	0	0	0	0	3	1	8	1	0	1	5	0	0	2	3
OG0001044	0	0	0	0	0	4	0	0	2	0	0	5	0	0	13
OG0001045	0	0	0	0	0	24	0	0	0	0	0	0	0	0	0
OG0001046	0	0	0	0	0	23	0	0	0	0	0	1	0	0	0
OG0001047	0	0	0	0	0	24	0	0	0	0	0	0	0	0	0
OG0001048	0	0	0	0	0	24	0	0	0	0	0	0	0	0	0
OG0001049	0	0	0	0	0	0	0	0	0	1	0	0	22	1	0
OG0001050	0	0	0	0	0	0	0	0	0	0	0	24	0	0	0
OG0001051	0	0	0	0	0	0	0	0	0	0	0	24	0	0	0
OG0001052	0	0	0	0	0	0	0	0	0	0	0	24	0	0	0
OG0001053	0	0	0	0	0	0	0	0	0	0	0	24	0	0	0
OG0001054	0	0	0	0	0	0	0	0	0	0	0	0	0	0	24
OG0001055	1	1	1	2	1	1	1	1	3	2	1	2	1	1	4
OG0001056	2	1	1	1	2	0	2	3	1	2	2	0	2	2	2
OG0001057	1	2	2	1	2	1	3	1	1	2	1	1	1	2	2
OG0001058	2	1	1	1	2	0	1	3	1	2	2	1	2	3	1
OG0001059	1	1	2	2	4	3	1	2	1	1	1	1	1	1	1
OG0001060	1	1	2	1	2	2	1	1	1	2	3	1	1	3	1
OG0001061	3	1	1	1	2	0	2	3	1	3	2	0	0	3	1
OG0001062	3	1	4	1	1	0	1	8	0	0	1	1	2	0	0
OG0001063	2	1	3	1	2	1	2	2	1	2	1	0	2	1	2
OG0001064	1	1	1	1	2	2	1	1	2	1	1	2	2	4	1
OG0001065	1	2	3	2	1	3	1	2	2	1	1	1	1	1	1
OG0001066	1	1	1	1	1	1	1	3	3	1	2	2	1	1	3
OG0001067	1	1	1	1	5	1	1	2	1	1	1	1	3	2	1
OG0001068	3	3	1	2	1	1	3	0	2	1	3	0	1	0	2
OG0001069	2	1	1	1	2	1	3	4	1	2	1	1	1	1	1
OG0001070	2	1	1	1	2	2	1	1	3	2	1	1	1	2	2
OG0001071	2	2	2	2	1	1	2	2	1	2	1	1	1	2	1
OG0001072	3	4	4	1	0	0	2	0	3	0	1	0	2	0	3
OG0001073	2	3	1	3	0	0	2	2	2	2	2	0	1	1	2
OG0001074	1	1	1	1	1	5	1	2	1	1	1	3	2	1	1
OG0001075	1	1	1	1	2	1	1	1	2	2	1	2	2	2	3
OG0001076	1	1	1	1	4	1	2	0	2	2	1	3	1	1	2
OG0001077	2	1	2	2	1	2	1	3	1	1	2	2	0	2	1
OG0001078	2	2	1	1	1	2	3	2	1	1	2	1	1	1	2
OG0001079	1	3	2	2	1	1	3	1	1	2	1	1	1	2	1
OG0001080	2	1	1	1	1	1	4	1	1	2	1	4	1	1	1
OG0001081	1	3	3	2	1	0	1	1	2	3	1	1	1	1	2
OG0001082	1	1	1	1	3	2	1	3	2	2	1	0	1	2	2
OG0001083	2	1	1	2	1	2	3	1	3	1	2	1	1	1	1
OG0001084	1	1	1	1	1	1	1	1	3	1	6	2	1	1	1
OG0001085	3	2	1	4	1	0	2	1	1	1	1	1	2	2	1
OG0001086	1	1	3	2	1	3	1	1	1	2	3	1	1	1	1
OG0001087	1	1	1	1	1	8	1	1	1	1	1	1	1	2	1
OG0001088	2	1	3	4	1	0	0	1	3	1	1	0	0	3	3
OG0001089	1	2	2	2	1	1	0	3	2	0	1	1	1	5	1
OG0001090	1	1	2	1	2	3	1	2	2	1	1	2	1	1	2
OG0001091	1	1	2	1	2	3	1	2	1	2	1	2	1	2	1
OG0001092	2	1	2	1	1	5	1	2	1	1	1	2	1	1	1
OG0001093	1	1	1	1	1	9	1	1	1	1	1	1	1	1	1
OG0001094	1	2	2	2	2	1	2	1	2	1	2	1	1	1	2
OG0001095	2	1	1	2	2	1	5	1	1	1	1	1	1	2	1
OG0001096	1	1	1	2	1	8	1	1	1	1	1	1	1	1	1
OG0001097	2	2	2	2	1	1	1	2	2	2	2	0	1	2	1
OG0001098	2	2	2	2	1	0	1	1	3	1	2	1	1	1	3
OG0001099	2	1	1	1	2	1	1	1	1	4	1	1	2	3	1
OG0001100	1	1	1	1	2	0	3	1	1	1	1	2	1	5	2
OG0001101	1	1	1	1	1	1	2	2	5	1	0	1	1	1	4
OG0001102	1	1	1	1	6	1	1	1	0	3	0	1	1	4	1
OG0001103	2	2	1	1	2	3	2	1	2	1	1	2	1	1	1
OG0001104	1	1	1	1	9	3	1	0	0	2	1	0	1	1	1
OG0001105	1	2	2	3	2	0	1	1	3	1	1	1	1	1	3
OG0001106	1	1	1	1	2	4	1	2	1	1	2	1	1	1	3
OG0001107	1	1	3	1	2	3	2	3	2	1	1	0	0	1	2
OG0001108	1	1	1	1	1	8	1	1	1	1	1	1	2	1	1
OG0001109	1	3	3	1	1	0	3	0	0	3	0	1	2	3	2
OG0001110	0	2	2	2	0	0	3	2	1	3	3	1	1	2	1
OG0001111	0	2	6	2	1	6	1	0	0	0	0	0	2	3	0
OG0001112	0	3	1	7	1	7	0	0	0	1	0	1	1	1	0
OG0001113	0	3	3	2	0	0	5	2	0	0	0	8	0	0	0
OG0001114	0	2	1	1	4	1	1	3	1	2	1	1	1	2	2
OG0001115	0	3	1	0	3	8	0	0	0	1	1	6	0	0	0
OG0001116	0	1	0	2	3	7	0	1	0	1	0	1	2	5	0
OG0001117	0	0	2	0	0	7	1	4	0	0	0	1	4	2	2
OG0001118	0	0	2	1	4	4	0	0	0	1	0	0	2	0	9
OG0001119	0	0	1	2	2	0	6	1	4	2	1	0	0	2	2
OG0001120	0	0	0	13	0	6	0	0	0	0	0	0	4	0	0
OG0001121	0	0	0	0	5	0	2	0	0	9	0	0	0	7	0
OG0001122	0	0	0	0	14	1	0	1	0	0	0	5	1	1	0
OG0001123	0	0	0	0	4	0	5	2	0	1	0	1	8	2	0
OG0001124	0	0	0	0	17	0	0	0	1	3	0	0	0	2	0
OG0001125	0	0	0	0	1	4	0	0	0	1	3	3	11	0	0
OG0001126	0	0	0	0	6	0	4	0	0	1	0	0	0	12	0
OG0001127	0	0	0	0	1	0	0	16	0	4	0	0	2	0	0
OG0001128	0	0	0	0	1	2	0	0	0	9	0	1	6	4	0
OG0001129	0	0	0	0	1	17	0	0	0	3	0	0	0	2	0
OG0001130	0	0	0	0	1	6	0	3	0	6	0	6	0	1	0
OG0001131	0	0	0	0	0	16	0	1	0	0	0	0	4	1	1
OG0001132	0	0	0	0	0	23	0	0	0	0	0	0	0	0	0
OG0001133	0	0	0	0	0	21	0	0	0	0	0	2	0	0	0
OG0001134	0	0	0	0	0	0	23	0	0	0	0	0	0	0	0
OG0001135	0	0	0	0	0	0	22	0	0	0	1	0	0	0	0
OG0001136	0	0	0	0	0	0	0	0	0	2	0	0	0	21	0
OG0001137	0	0	0	0	0	0	0	0	0	0	0	0	0	23	0
OG0001138	2	1	2	1	3	1	1	1	1	3	1	1	1	2	1
OG0001139	2	2	1	1	2	1	1	2	1	2	2	1	1	2	1
OG0001140	2	1	2	1	2	2	2	1	1	1	2	2	1	1	1
OG0001141	1	1	1	1	1	1	1	2	2	1	2	3	2	1	2
OG0001142	1	1	1	1	1	8	1	1	1	1	1	1	1	1	1
OG0001143	1	2	2	2	1	1	2	1	2	1	2	1	1	1	2
OG0001144	2	1	1	1	1	1	1	1	2	2	1	1	1	4	2
OG0001145	1	1	1	1	2	1	1	2	1	1	1	3	3	2	1
OG0001146	1	1	1	1	1	6	1	2	1	1	1	2	1	1	1
OG0001147	7	1	2	1	1	0	1	1	0	2	1	0	3	1	1
OG0001148	2	2	3	1	1	4	2	1	0	1	1	1	1	1	1
OG0001149	1	1	1	1	1	1	1	1	3	4	1	1	1	2	2
OG0001150	1	1	1	1	2	1	2	1	0	2	1	3	3	1	2
OG0001151	2	1	1	1	1	2	2	2	2	1	1	1	2	1	2
OG0001152	1	1	1	1	1	8	2	1	1	1	1	1	0	1	1
OG0001153	1	1	1	1	2	6	1	1	1	1	1	2	1	1	1
OG0001154	1	1	1	1	1	3	1	1	2	1	1	2	2	1	3
OG0001155	1	1	1	1	2	3	2	1	1	2	1	1	1	2	2
OG0001156	2	1	1	1	4	0	1	3	0	2	2	1	1	3	0
OG0001157	1	1	1	1	1	8	1	1	1	1	1	1	1	1	1
OG0001158	1	1	1	1	1	6	2	1	1	1	1	2	1	1	1
OG0001159	1	1	1	1	1	7	2	1	1	1	1	1	1	1	1
OG0001160	1	1	2	1	3	1	4	1	1	2	1	1	1	1	1
OG0001161	1	1	1	1	2	1	2	1	2	4	1	1	1	1	2
OG0001162	2	2	2	1	1	1	2	2	1	1	2	1	1	1	2
OG0001163	2	1	1	1	2	1	1	1	1	1	1	3	1	1	4
OG0001164	3	1	1	1	1	2	1	2	1	1	1	2	3	1	1
OG0001165	1	1	3	2	2	1	1	2	1	2	1	1	1	2	1
OG0001166	1	1	1	1	1	8	1	1	1	1	1	1	1	1	1
OG0001167	1	2	2	3	3	0	1	1	1	2	3	0	1	1	1
OG0001168	1	1	2	1	1	1	2	2	1	2	2	0	2	2	2
OG0001169	1	1	1	1	2	2	1	2	2	1	1	3	1	1	2
OG0001170	2	1	1	1	0	0	3	0	4	0	2	0	4	0	4
OG0001171	1	1	3	1	1	1	1	4	3	1	1	1	1	1	1
OG0001172	1	1	2	1	1	7	1	1	1	1	1	1	1	1	1
OG0001173	3	1	1	3	1	1	2	1	1	1	1	1	3	1	1
OG0001174	1	1	1	1	1	1	2	1	1	0	7	2	1	1	1
OG0001175	1	1	2	0	1	1	2	1	1	2	1	1	6	1	1
OG0001176	1	1	1	3	2	0	1	1	1	1	1	5	1	2	1
OG0001177	1	2	1	3	4	1	1	2	1	1	1	1	1	1	1
OG0001178	1	1	2	1	2	2	2	2	1	3	1	1	1	1	1
OG0001179	2	1	1	3	1	1	5	2	1	1	1	2	1	0	0
OG0001180	1	1	5	1	1	1	1	1	0	1	1	1	4	2	1
OG0001181	2	2	2	1	2	1	1	2	1	1	1	1	3	1	1
OG0001182	1	2	1	1	1	3	1	1	1	1	5	1	1	1	1
OG0001183	2	1	1	1	1	5	1	2	1	1	1	2	1	1	1
OG0001184	1	1	1	2	1	2	1	2	2	1	1	2	2	2	1
OG0001185	2	1	1	1	1	1	5	1	1	1	1	1	2	1	2
OG0001186	5	1	1	1	1	1	1	3	1	1	1	1	1	2	1
OG0001187	1	1	1	2	1	3	1	2	3	1	1	1	0	1	3
OG0001188	1	1	1	1	3	1	1	2	2	1	1	2	1	3	1
OG0001189	1	2	3	2	1	0	1	1	2	3	2	0	1	2	1
OG0001190	1	1	3	1	0	2	1	1	2	5	2	1	1	0	1
OG0001191	1	2	2	2	1	2	3	1	1	2	1	1	1	1	1
OG0001192	1	0	2	0	0	7	0	0	0	0	0	0	12	0	0
OG0001193	1	1	1	1	3	3	1	1	1	2	1	1	1	1	3
OG0001194	1	1	2	1	2	0	2	1	4	1	1	2	1	1	2
OG0001195	3	3	3	9	0	0	0	0	0	2	0	0	0	2	0
OG0001196	2	1	1	1	1	0	2	3	1	1	2	1	3	1	2
OG0001197	2	1	2	2	2	1	1	2	2	2	1	1	0	1	2
OG0001198	1	1	3	2	1	2	0	3	1	2	1	2	0	2	1
OG0001199	2	1	2	1	2	1	3	1	1	2	2	1	1	1	1
OG0001200	1	1	1	1	1	3	1	1	1	2	1	5	1	1	1
OG0001201	1	1	1	1	1	1	1	1	3	2	1	4	1	1	2
OG0001202	1	1	1	1	1	6	1	1	2	1	1	2	1	1	1
OG0001203	2	1	1	1	1	1	1	1	4	1	1	1	1	1	4
OG0001204	1	1	1	2	1	5	3	1	1	1	1	1	1	1	1
OG0001205	1	1	2	1	2	0	3	3	1	1	1	0	2	1	3
OG0001206	1	1	1	1	7	2	1	1	1	1	1	1	1	1	1
OG0001207	1	1	1	1	1	8	1	1	1	1	1	1	1	1	1
OG0001208	1	1	1	1	3	6	1	1	1	1	1	1	1	1	1
OG0001209	1	2	1	2	1	2	1	1	1	7	1	0	1	1	0
OG0001210	1	2	1	2	2	3	2	2	1	1	1	2	0	1	1
OG0001211	1	1	1	1	1	1	1	2	1	1	1	3	5	1	1
OG0001212	1	2	1	3	1	0	2	1	2	1	2	1	1	1	3
OG0001213	1	1	2	1	1	4	2	1	1	0	1	3	1	2	1
OG0001214	1	3	3	2	1	1	1	1	2	0	1	1	1	1	3
OG0001215	1	2	2	3	1	1	3	1	1	1	3	0	1	1	1
OG0001216	1	1	1	1	2	4	6	1	0	1	1	1	0	1	1
OG0001217	1	1	1	1	1	9	1	1	1	1	1	1	1	0	1
OG0001218	1	1	0	1	0	1	5	0	5	0	3	0	0	0	5
OG0001219	1	1	2	1	1	2	1	4	1	1	1	1	2	2	1
OG0001220	1	1	3	1	2	2	1	1	1	3	1	1	2	1	1
OG0001221	1	0	0	1	3	0	0	0	1	0	1	0	0	15	0
OG0001222	0	4	4	4	0	3	2	1	0	1	0	2	1	0	0
OG0001223	0	4	4	11	0	0	0	0	0	0	0	3	0	0	0
OG0001224	0	7	0	1	3	1	1	0	0	0	2	0	0	7	0
OG0001225	0	1	0	3	9	0	0	3	0	0	6	0	0	0	0
OG0001226	0	0	22	0	0	0	0	0	0	0	0	0	0	0	0
OG0001227	0	0	5	11	0	0	0	0	0	0	0	0	0	6	0
OG0001228	0	0	0	2	7	1	0	0	0	9	0	0	0	3	0
OG0001229	0	0	0	0	1	0	0	0	0	2	0	0	0	19	0
OG0001230	0	0	0	0	16	0	0	0	0	4	0	0	0	2	0
OG0001231	0	0	0	0	7	3	1	1	0	7	0	0	1	2	0
OG0001232	0	0	0	0	5	1	0	1	0	5	0	7	0	3	0
OG0001233	0	0	0	0	0	22	0	0	0	0	0	0	0	0	0
OG0001234	0	0	0	0	0	22	0	0	0	0	0	0	0	0	0
OG0001235	0	0	0	0	0	22	0	0	0	0	0	0	0	0	0
OG0001236	0	0	0	0	0	22	0	0	0	0	0	0	0	0	0
OG0001237	0	0	0	0	0	2	0	0	0	12	0	0	4	4	0
OG0001238	0	0	0	0	0	0	0	22	0	0	0	0	0	0	0
OG0001239	0	0	0	0	0	0	0	0	1	0	0	0	0	0	21
OG0001240	0	0	0	0	0	0	0	0	0	7	1	0	0	14	0
OG0001241	1	1	1	1	2	2	1	2	1	2	1	2	2	1	1
OG0001242	1	2	1	1	2	1	1	3	1	1	1	1	2	2	1
OG0001243	2	3	1	2	2	0	0	1	1	3	2	0	2	1	1
OG0001244	1	2	1	3	1	0	2	1	2	1	2	1	1	1	2
OG0001245	2	1	1	0	1	1	4	2	1	1	2	1	2	1	1
OG0001246	1	1	0	2	1	1	1	1	3	1	0	3	2	1	3
OG0001247	1	2	2	2	1	1	2	1	1	1	1	1	2	1	2
OG0001248	1	1	2	2	1	0	1	1	2	2	3	0	1	1	3
OG0001249	1	3	1	1	1	1	1	1	5	1	1	2	0	1	1
OG0001250	1	2	3	3	1	0	1	1	0	1	1	0	3	4	0
OG0001251	2	1	1	2	1	1	0	2	2	2	2	0	1	2	2
OG0001252	2	1	1	2	1	1	2	1	1	2	1	3	1	1	1
OG0001253	2	2	1	1	1	1	1	1	3	1	2	1	1	1	2
OG0001254	1	1	1	2	2	1	1	1	2	1	2	1	2	1	2
OG0001255	1	1	1	1	1	7	1	1	1	1	1	1	1	1	1
OG0001256	1	2	1	1	2	0	1	2	1	2	1	3	2	1	1
OG0001257	1	1	1	1	2	1	1	3	1	2	1	2	1	2	1
OG0001258	1	1	1	1	2	3	1	1	2	1	2	1	1	1	2
OG0001259	1	1	1	1	1	3	2	1	1	1	2	1	1	2	2
OG0001260	2	1	1	2	1	1	1	1	1	1	2	1	1	3	2
OG0001261	2	2	2	2	1	1	1	1	1	1	2	1	1	2	1
OG0001262	1	1	1	1	1	1	3	1	2	2	1	2	1	1	2
OG0001263	1	1	1	1	3	1	2	1	1	2	1	1	2	2	1
OG0001264	1	1	1	1	1	6	1	1	1	1	1	2	1	1	1
OG0001265	4	1	1	1	1	2	1	2	1	1	2	1	1	1	1
OG0001266	1	1	1	1	1	7	1	1	1	1	1	1	1	1	1
OG0001267	1	1	1	1	2	2	1	1	1	2	1	2	2	2	1
OG0001268	1	1	1	1	1	6	1	1	1	2	1	1	1	1	1
OG0001269	2	1	1	1	2	2	1	1	1	1	1	2	3	1	1
OG0001270	1	1	3	1	1	1	3	1	1	2	1	1	1	1	2
OG0001271	1	1	1	1	1	1	6	2	1	1	1	1	1	1	1
OG0001272	1	1	2	1	1	5	2	1	1	1	1	1	1	1	1
OG0001273	1	1	1	1	1	1	1	1	2	6	1	1	1	1	1
OG0001274	1	2	2	2	1	1	2	1	0	1	1	1	3	2	1
OG0001275	1	1	1	1	2	3	1	1	1	3	1	1	1	2	1
OG0001276	1	1	3	1	1	1	1	1	1	1	1	1	4	2	1
OG0001277	1	1	1	1	1	5	1	2	1	1	1	2	1	1	1
OG0001278	2	1	1	1	2	2	1	1	1	2	1	1	1	2	2
OG0001279	3	1	1	1	1	1	1	1	1	1	1	5	1	1	1
OG0001280	1	1	1	1	1	6	1	1	1	1	1	2	1	1	1
OG0001281	1	1	1	1	2	2	1	1	1	2	1	3	1	2	1
OG0001282	1	1	1	1	1	0	2	1	1	5	1	2	1	2	1
OG0001283	2	1	1	1	1	1	2	3	1	2	2	1	1	1	1
OG0001284	1	1	1	1	1	1	1	1	1	2	1	1	4	1	3
OG0001285	1	2	2	1	0	1	2	1	2	1	2	2	1	1	2
OG0001286	1	0	0	0	10	1	1	1	1	1	1	1	1	1	1
OG0001287	2	0	0	1	1	1	5	3	1	1	1	1	3	1	0
OG0001288	1	2	1	1	1	2	1	2	1	1	4	1	1	1	1
OG0001289	1	1	1	1	0	5	1	1	1	3	1	1	1	2	1
OG0001290	2	2	2	2	0	0	1	1	2	2	2	0	2	1	2
OG0001291	1	1	1	1	1	1	1	1	1	1	1	1	1	7	1
OG0001292	1	1	2	1	1	3	1	1	0	3	6	0	0	1	0
OG0001293	1	1	2	2	0	0	0	2	1	1	1	0	2	7	1
OG0001294	2	2	2	2	1	3	1	1	1	1	1	1	1	1	1
OG0001295	1	1	1	1	2	1	2	1	2	2	1	1	1	2	2
OG0001296	1	1	1	1	3	1	1	2	1	2	1	1	1	3	1
OG0001297	1	0	1	1	2	1	0	1	1	4	3	2	1	2	1
OG0001298	1	2	1	2	1	2	1	1	2	1	2	1	1	1	2
OG0001299	2	2	2	2	1	0	2	1	2	1	1	1	1	1	2
OG0001300	1	2	2	2	1	2	1	1	1	2	1	2	0	2	1
OG0001301	1	2	2	1	1	3	1	2	1	1	2	2	1	0	1
OG0001302	1	2	1	1	1	1	0	1	1	1	2	0	0	8	1
OG0001303	1	1	1	1	1	1	3	1	1	2	1	4	1	1	1
OG0001304	1	2	1	5	1	2	1	1	1	1	1	1	1	1	1
OG0001305	3	2	1	1	1	1	1	1	2	2	1	1	1	1	2
OG0001306	2	1	2	3	0	0	2	0	0	1	0	0	0	10	0
OG0001307	1	1	1	1	2	2	2	2	1	1	1	2	2	1	1
OG0001308	1	1	5	3	1	1	1	1	1	1	1	1	1	1	1
OG0001309	1	1	1	1	4	2	2	1	0	2	1	1	1	2	1
OG0001310	1	1	1	1	0	1	1	1	3	0	1	1	1	1	7
OG0001311	1	2	1	1	2	2	1	1	1	3	1	1	1	2	1
OG0001312	1	1	1	1	1	1	2	3	2	1	1	3	1	1	1
OG0001313	2	2	2	2	1	0	2	1	2	1	2	0	1	1	2
OG0001314	2	1	2	1	1	2	2	1	1	2	1	2	1	1	1
OG0001315	1	2	4	2	2	0	1	2	1	2	1	0	1	1	1
OG0001316	1	1	1	2	2	0	4	3	1	2	1	0	1	1	1
OG0001317	3	0	16	0	0	0	0	0	0	0	0	0	2	0	0
OG0001318	1	0	3	0	0	0	2	0	0	4	1	4	0	2	4
OG0001319	2	1	2	1	1	2	1	1	3	1	1	1	1	1	2
OG0001320	2	0	3	3	0	0	1	1	0	1	1	0	3	4	2
OG0001321	1	4	2	0	1	1	2	1	0	0	1	0	0	3	5
OG0001322	0	6	6	8	0	0	0	0	1	0	0	0	0	0	0
OG0001323	0	1	5	1	1	0	0	0	0	3	1	5	1	3	0
OG0001324	0	1	1	1	0	7	1	1	1	1	2	1	1	1	2
OG0001325	0	5	7	4	0	0	0	0	0	1	0	0	1	3	0
OG0001326	0	1	0	1	0	9	0	1	0	2	0	0	3	3	1
OG0001327	0	1	2	4	1	1	1	1	3	2	1	1	1	1	1
OG0001328	0	0	4	0	1	1	0	6	0	0	1	1	2	5	0
OG0001329	0	0	0	3	1	4	0	0	0	1	1	7	2	2	0
OG0001330	0	0	0	0	19	0	0	1	0	0	0	0	0	0	1
OG0001331	0	0	0	0	21	0	0	0	0	0	0	0	0	0	0
OG0001332	0	0	0	0	21	0	0	0	0	0	0	0	0	0	0
OG0001333	0	0	0	0	5	2	2	5	0	2	0	3	1	1	0
OG0001334	0	0	0	0	1	12	1	0	0	0	0	0	4	2	1
OG0001335	0	0	0	0	1	5	0	1	0	7	0	4	1	2	0
OG0001336	0	0	0	0	21	0	0	0	0	0	0	0	0	0	0
OG0001337	0	0	0	0	0	21	0	0	0	0	0	0	0	0	0
OG0001338	0	0	0	0	0	21	0	0	0	0	0	0	0	0	0
OG0001339	0	0	0	0	0	21	0	0	0	0	0	0	0	0	0
OG0001340	0	0	0	0	0	20	0	0	0	0	1	0	0	0	0
OG0001341	0	0	0	0	0	0	0	0	0	0	0	21	0	0	0
OG0001342	0	0	0	0	0	0	0	0	0	0	0	0	0	21	0
OG0001343	0	0	0	0	0	0	0	0	0	0	0	0	0	21	0
OG0001344	1	2	1	1	2	1	1	1	1	2	2	2	1	1	1
OG0001345	2	1	1	1	0	1	2	1	1	1	2	2	2	1	2
OG0001346	19	0	0	0	0	0	0	0	1	0	0	0	0	0	0
OG0001347	2	2	2	2	1	1	2	1	2	1	1	0	0	1	2
OG0001348	1	1	1	1	1	0	4	1	1	1	1	2	3	1	1
OG0001349	1	1	1	1	1	3	1	3	1	2	1	1	1	1	1
OG0001350	3	1	2	1	0	1	5	1	2	0	1	1	0	0	2
OG0001351	1	1	1	1	2	1	1	1	1	2	1	1	1	4	1
OG0001352	1	2	2	2	1	0	3	1	1	1	1	2	1	1	1
OG0001353	1	1	0	1	2	0	1	2	1	2	1	3	2	2	1
OG0001354	1	1	1	1	1	5	1	2	0	1	1	2	1	1	1
OG0001355	2	1	1	1	2	1	1	0	1	2	2	1	1	2	2
OG0001356	1	1	1	1	3	1	2	1	1	2	1	1	1	2	1
OG0001357	1	1	2	2	2	0	0	4	1	0	2	1	1	2	1
OG0001358	2	0	0	1	1	3	0	1	1	2	2	2	1	1	3
OG0001359	1	1	1	1	2	1	5	1	1	1	1	1	1	1	1
OG0001360	1	0	0	0	0	4	1	10	0	0	2	0	2	0	0
OG0001361	1	1	1	1	1	2	2	2	2	1	1	1	2	1	1
OG0001362	1	1	1	2	1	1	3	1	1	1	1	2	1	1	2
OG0001363	1	1	1	1	2	1	1	2	1	2	1	1	2	2	1
OG0001364	3	3	4	2	0	0	1	2	0	0	4	0	1	0	0
OG0001365	1	1	1	1	2	2	2	1	2	1	1	2	1	1	1
OG0001366	1	1	1	1	2	0	1	1	1	4	1	2	1	2	1
OG0001367	1	1	1	1	2	1	2	1	1	2	1	2	1	2	1
OG0001368	3	1	1	1	1	1	2	1	2	1	1	0	1	1	3
OG0001369	1	1	1	1	2	3	1	1	1	1	1	2	2	1	1
OG0001370	3	1	1	2	0	2	1	0	1	2	1	0	3	1	2
OG0001371	2	2	1	2	4	0	1	1	1	0	1	1	1	2	1
OG0001372	1	1	2	1	1	1	2	1	1	2	1	1	1	2	2
OG0001373	1	1	1	1	1	2	1	1	2	1	1	3	1	1	2
OG0001374	2	2	1	1	1	1	2	1	1	1	2	1	2	1	1
OG0001375	1	2	1	1	1	1	2	1	1	1	1	4	1	1	1
OG0001376	1	1	1	1	1	2	3	1	1	2	1	1	2	1	1
OG0001377	1	1	1	1	2	1	1	1	1	2	2	1	2	2	1
OG0001378	1	1	1	1	1	3	1	1	1	2	3	2	1	1	0
OG0001379	1	1	1	1	1	1	1	1	1	1	0	1	1	7	1
OG0001380	2	1	3	1	1	2	1	3	1	1	1	0	1	1	1
OG0001381	1	1	1	1	1	6	1	1	1	1	1	1	1	1	1
OG0001382	1	1	1	1	1	2	1	1	1	1	5	1	1	1	1
OG0001383	1	1	1	1	1	6	1	1	1	1	1	1	1	1	1
OG0001384	1	1	1	1	1	6	1	1	1	1	1	1	1	1	1
OG0001385	3	1	2	1	0	0	3	1	2	0	2	3	0	0	2
OG0001386	2	2	4	2	1	0	2	2	1	1	1	0	0	1	1
OG0001387	1	1	1	1	1	1	1	1	3	1	1	1	1	1	4
OG0001388	1	1	1	1	1	1	1	3	1	3	0	3	1	1	1
OG0001389	3	2	1	2	1	1	1	1	1	1	2	1	1	1	1
OG0001390	1	1	1	1	1	1	1	4	1	1	1	2	1	1	2
OG0001391	1	1	1	1	1	6	1	1	1	1	1	1	1	1	1
OG0001392	1	1	1	1	3	1	1	2	1	1	1	1	1	2	2
OG0001393	1	1	1	1	1	4	3	1	1	1	1	1	1	1	1
OG0001394	1	2	4	2	1	0	1	1	1	1	1	2	1	1	1
OG0001395	1	1	1	1	2	1	1	1	1	3	1	2	1	2	1
OG0001396	3	1	1	1	1	0	2	1	2	1	1	1	1	1	3
OG0001397	1	1	1	1	1	5	1	1	1	2	1	1	1	1	1
OG0001398	2	1	1	1	2	1	0	1	2	1	1	2	2	1	2
OG0001399	1	1	1	1	1	3	3	1	1	2	1	1	1	1	1
OG0001400	1	1	1	1	1	1	1	1	1	2	1	1	3	3	1
OG0001401	1	1	1	1	1	3	1	1	1	2	2	1	1	2	1
OG0001402	1	1	1	1	4	2	1	1	1	1	1	2	1	1	1
OG0001403	3	0	0	0	0	0	0	2	0	4	3	1	7	0	0
OG0001404	3	0	2	0	0	4	1	1	0	2	0	3	0	1	3
OG0001405	2	1	1	1	1	1	1	2	1	1	1	2	1	2	2
OG0001406	1	1	4	1	1	1	3	1	1	1	1	1	1	1	1
OG0001407	1	1	1	1	1	2	1	1	3	1	1	1	1	1	3
OG0001408	1	1	1	1	2	2	1	1	1	2	1	1	1	3	1
OG0001409	1	1	1	1	2	1	1	1	3	1	0	1	2	1	3
OG0001410	2	2	2	1	1	2	2	1	1	0	1	2	1	1	1
OG0001411	1	1	1	1	1	1	2	2	1	1	1	1	2	3	1
OG0001412	1	1	2	1	1	1	1	1	1	1	1	5	1	1	1
OG0001413	1	1	1	1	1	1	1	1	2	1	1	2	1	3	2
OG0001414	1	1	1	1	3	1	1	1	1	2	1	2	1	2	1
OG0001415	2	1	1	1	1	2	1	2	1	1	1	3	1	1	1
OG0001416	1	1	2	2	2	2	1	1	1	2	1	1	1	1	1
OG0001417	2	1	1	1	3	0	1	1	0	3	1	0	2	2	2
OG0001418	2	1	2	1	1	1	1	2	1	2	1	1	2	1	1
OG0001419	1	1	1	1	3	0	1	1	2	1	1	2	2	2	1
OG0001420	1	1	1	1	1	6	1	1	1	1	1	1	1	1	1
OG0001421	1	1	1	1	1	5	1	1	2	1	1	1	1	1	1
OG0001422	2	1	1	3	1	1	1	1	1	1	1	0	4	1	1
OG0001423	1	1	1	1	1	1	1	1	1	1	2	4	1	2	1
OG0001424	3	1	1	1	1	3	1	1	1	1	2	1	1	1	1
OG0001425	1	1	1	1	1	3	1	1	1	0	1	3	3	1	1
OG0001426	1	1	1	1	5	0	1	1	1	2	1	1	1	2	1
OG0001427	2	1	1	1	1	1	1	1	3	2	2	1	1	1	1
OG0001428	1	1	1	1	1	6	1	1	1	1	1	1	1	1	1
OG0001429	1	4	1	1	1	1	4	1	2	1	0	1	0	1	1
OG0001430	1	2	1	2	1	2	1	3	1	1	1	1	1	1	1
OG0001431	1	2	2	1	1	2	1	1	1	2	3	1	0	1	1
OG0001432	1	1	1	0	2	2	4	1	1	2	1	2	1	0	1
OG0001433	1	1	1	1	2	0	1	1	1	3	1	0	1	5	1
OG0001434	1	1	1	1	1	5	1	1	1	1	2	1	1	1	1
OG0001435	1	1	1	1	1	1	1	1	3	1	1	1	1	1	4
OG0001436	1	1	1	2	1	3	1	2	1	1	1	2	1	1	1
OG0001437	1	2	1	1	1	3	3	1	1	1	1	1	1	1	1
OG0001438	1	2	1	3	1	1	1	1	2	1	1	1	1	1	2
OG0001439	1	1	1	1	3	1	1	1	1	2	1	1	1	1	3
OG0001440	1	1	1	1	2	1	1	1	2	1	1	1	1	1	4
OG0001441	1	1	1	1	1	5	1	1	1	1	1	2	1	1	1
OG0001442	1	1	1	1	4	1	1	1	3	1	0	1	1	1	2
OG0001443	1	3	5	4	0	0	1	0	2	0	0	0	2	0	2
OG0001444	1	1	1	1	1	1	1	2	1	2	1	1	2	2	2
OG0001445	1	1	1	1	1	1	3	1	3	1	1	1	1	1	2
OG0001446	2	1	1	1	1	1	1	1	3	1	1	1	1	1	3
OG0001447	1	1	1	1	3	0	1	1	1	1	2	1	1	4	1
OG0001448	1	2	2	2	2	0	2	2	1	1	1	0	2	1	1
OG0001449	6	0	0	0	2	0	1	3	0	4	3	0	0	1	0
OG0001450	2	2	2	2	1	0	0	0	2	1	1	0	1	4	2
OG0001451	2	1	1	1	3	2	1	1	1	2	1	1	1	1	1
OG0001452	1	4	2	3	0	0	3	1	1	0	1	0	1	2	1
OG0001453	2	1	1	1	2	2	1	1	1	1	2	1	2	1	1
OG0001454	1	1	1	1	1	0	2	4	2	1	1	1	1	1	2
OG0001455	1	1	1	1	1	5	1	1	1	1	1	1	2	1	1
OG0001456	2	2	1	2	1	0	2	3	2	2	0	0	0	1	2
OG0001457	1	1	1	1	2	3	1	1	1	1	1	2	2	1	1
OG0001458	1	1	1	1	1	2	2	1	2	1	1	2	1	1	2
OG0001459	1	0	0	0	0	16	0	2	0	0	0	0	1	0	0
OG0001460	1	0	3	0	4	1	2	1	0	2	1	0	4	1	0
OG0001461	1	0	0	0	5	2	0	1	0	2	1	2	3	3	0
OG0001462	1	2	1	1	1	1	2	1	1	1	1	1	3	2	1
OG0001463	1	1	1	1	1	1	1	1	1	1	3	2	1	3	1
OG0001464	1	1	2	1	1	1	1	1	0	1	4	1	3	1	1
OG0001465	1	1	1	1	2	2	1	2	1	2	1	1	1	2	1
OG0001466	1	1	1	1	1	5	1	1	1	1	1	1	1	1	2
OG0001467	2	0	0	5	0	0	2	1	0	0	0	0	0	10	0
OG0001468	1	1	2	1	1	1	2	1	1	2	2	1	2	1	1
OG0001469	1	1	3	2	1	1	1	2	1	1	1	1	1	2	1
OG0001470	1	2	2	1	1	1	3	1	1	2	1	1	1	1	1
OG0001471	1	1	1	2	3	2	1	1	1	1	2	1	1	1	1
OG0001472	2	2	1	1	1	3	1	1	1	1	2	1	2	0	1
OG0001473	1	1	2	1	1	2	2	1	1	2	1	1	2	1	1
OG0001474	2	1	1	1	1	1	1	1	1	1	1	2	3	2	1
OG0001475	1	2	2	1	2	2	2	0	1	2	1	1	1	1	1
OG0001476	1	1	3	1	1	2	1	1	2	1	1	1	1	1	2
OG0001477	1	1	1	1	1	3	2	2	1	1	1	2	1	1	1
OG0001478	1	2	9	0	0	1	1	2	1	0	0	1	1	0	1
OG0001479	1	1	2	2	2	0	1	3	1	2	1	1	1	1	1
OG0001480	1	1	3	1	1	2	1	1	2	1	2	0	1	1	2
OG0001481	1	1	1	1	5	1	1	1	1	1	2	0	2	1	1
OG0001482	1	8	1	0	0	0	1	0	0	0	5	0	0	3	1
OG0001483	0	2	1	0	2	1	1	2	0	3	1	2	2	3	0
OG0001484	0	1	10	8	0	0	0	1	0	0	0	0	0	0	0
OG0001485	0	8	0	0	2	5	0	2	0	0	0	2	0	1	0
OG0001486	0	1	1	1	1	4	3	1	1	2	1	1	1	1	1
OG0001487	0	0	20	0	0	0	0	0	0	0	0	0	0	0	0
OG0001488	0	0	2	1	0	2	5	1	0	5	0	0	1	3	0
OG0001489	0	0	0	0	8	0	1	0	0	4	0	0	0	7	0
OG0001490	0	0	0	0	2	0	0	0	1	5	0	0	7	4	1
OG0001491	0	0	0	0	6	6	0	0	0	2	0	3	0	3	0
OG0001492	0	0	0	0	5	0	0	3	0	0	0	0	4	8	0
OG0001493	0	0	0	0	9	0	0	0	0	5	0	0	0	6	0
OG0001494	0	0	0	0	7	0	0	0	0	13	0	0	0	0	0
OG0001495	0	0	0	0	0	20	0	0	0	0	0	0	0	0	0
OG0001496	0	0	0	0	0	20	0	0	0	0	0	0	0	0	0
OG0001497	0	0	0	0	0	20	0	0	0	0	0	0	0	0	0
OG0001498	0	0	0	0	0	20	0	0	0	0	0	0	0	0	0
OG0001499	0	0	0	0	0	14	0	0	0	1	0	0	3	1	1
OG0001500	0	0	0	0	0	20	0	0	0	0	0	0	0	0	0
OG0001501	0	0	0	0	0	20	0	0	0	0	0	0	0	0	0
OG0001502	0	0	0	0	0	0	8	0	0	2	0	1	7	0	2
OG0001503	0	0	0	0	0	0	0	20	0	0	0	0	0	0	0
OG0001504	0	0	0	0	0	0	0	20	0	0	0	0	0	0	0
OG0001505	0	0	0	0	0	0	0	0	0	0	0	20	0	0	0
OG0001506	0	0	0	0	0	0	0	0	0	0	0	0	20	0	0
OG0001507	0	0	0	0	0	0	0	0	0	0	0	0	0	20	0
OG0001508	0	0	0	0	0	0	0	0	0	0	0	0	0	20	0
OG0001509	1	1	1	1	1	1	1	1	2	2	1	1	2	1	2
OG0001510	1	1	1	1	1	1	1	2	1	1	1	4	1	1	1
OG0001511	1	1	1	1	0	1	0	2	0	5	1	1	4	1	0
OG0001512	1	1	1	1	3	1	1	1	1	2	1	1	1	2	1
OG0001513	1	1	1	1	1	1	1	1	1	1	1	2	1	2	3
OG0001514	1	1	1	1	1	1	1	3	1	1	1	1	1	2	2
OG0001515	1	1	1	1	3	2	1	1	1	1	1	1	1	2	1
OG0001516	1	1	1	1	2	1	2	1	1	1	2	2	1	1	1
OG0001517	1	1	1	1	1	1	1	1	2	1	1	1	1	1	4
OG0001518	1	1	1	1	3	1	1	1	1	3	1	1	1	1	1
OG0001519	2	1	1	1	1	1	1	3	1	1	2	1	1	1	1
OG0001520	1	1	2	3	0	0	1	0	3	0	4	0	1	0	3
OG0001521	1	1	3	1	1	1	2	1	1	1	1	2	1	1	1
OG0001522	1	1	1	1	1	1	5	1	1	1	1	1	1	1	1
OG0001523	1	1	1	1	1	1	1	1	1	3	1	2	1	2	1
OG0001524	3	1	1	1	1	1	1	2	1	1	2	0	1	1	2
OG0001525	1	1	1	1	1	5	1	1	1	1	1	1	1	1	1
OG0001526	1	1	1	1	1	4	1	1	1	1	1	1	2	1	1
OG0001527	1	1	1	1	1	1	1	1	1	1	1	1	1	5	1
OG0001528	1	1	1	1	2	2	1	1	2	1	1	2	1	1	1
OG0001529	1	2	2	2	1	1	1	2	1	1	1	1	1	1	1
OG0001530	2	1	1	1	1	1	1	1	1	1	1	2	1	2	2
OG0001531	1	1	1	1	2	2	2	1	1	2	1	1	1	1	1
OG0001532	1	1	1	1	1	3	1	2	1	1	1	2	1	1	1
OG0001533	2	1	1	2	1	1	1	1	1	1	2	1	1	1	2
OG0001534	1	1	1	1	1	1	2	2	1	2	1	1	2	1	1
OG0001535	1	1	1	1	1	1	1	1	1	1	1	2	1	1	4
OG0001536	1	1	1	1	2	2	3	1	1	1	1	1	1	1	1
OG0001537	1	1	1	1	1	0	1	1	3	1	1	1	0	1	5
OG0001538	1	1	1	1	1	3	1	1	2	1	1	1	1	1	2
OG0001539	1	1	1	1	1	1	3	3	1	1	1	1	1	1	1
OG0001540	1	1	1	1	2	2	1	1	1	1	1	3	1	1	1
OG0001541	1	1	1	2	1	1	1	1	2	1	1	0	3	1	2
OG0001542	1	1	1	1	3	1	1	1	1	3	1	1	1	1	1
OG0001543	2	1	2	6	0	0	1	1	1	0	0	1	3	1	0
OG0001544	1	1	1	1	1	1	2	1	3	1	1	1	1	1	2
OG0001545	2	2	1	1	1	1	2	1	1	0	2	0	0	1	4
OG0001546	1	1	1	1	1	0	1	1	1	1	1	5	1	2	1
OG0001547	1	1	1	1	1	4	1	1	1	1	1	1	1	2	1
OG0001548	1	2	2	2	1	2	1	1	2	0	1	1	1	1	1
OG0001549	1	1	1	0	1	5	2	1	1	1	1	1	1	1	1
OG0001550	1	1	1	1	3	2	1	1	1	1	1	1	2	1	1
OG0001551	5	2	1	1	1	0	1	1	1	1	1	1	0	1	2
OG0001552	1	1	1	1	2	2	1	1	1	1	1	2	2	1	1
OG0001553	1	1	1	1	1	2	1	1	1	3	1	2	1	1	1
OG0001554	1	1	1	1	1	3	2	2	0	1	1	2	1	1	1
OG0001555	2	2	1	1	1	2	1	1	1	1	1	2	1	1	1
OG0001556	1	1	1	1	2	1	1	1	1	1	2	3	1	1	1
OG0001557	1	1	1	1	1	2	1	1	1	1	1	1	1	4	1
OG0001558	1	1	1	1	2	1	1	1	1	2	1	2	1	2	1
OG0001559	1	1	1	1	1	1	1	1	3	1	1	1	1	1	3
OG0001560	1	1	1	1	1	2	2	1	1	1	1	3	1	1	1
OG0001561	1	2	1	1	2	1	3	0	0	1	3	1	0	3	0
OG0001562	1	1	1	1	1	3	1	1	1	1	1	2	2	1	1
OG0001563	1	1	1	1	1	3	1	1	1	3	1	1	1	1	1
OG0001564	1	1	1	1	1	4	2	1	1	1	1	1	1	1	1
OG0001565	1	1	1	1	1	3	3	1	0	1	1	1	3	1	0
OG0001566	1	1	1	1	2	3	1	1	1	1	0	2	1	2	1
OG0001567	1	1	1	1	1	2	1	1	2	1	1	1	2	1	2
OG0001568	1	1	1	1	1	5	1	1	1	1	1	1	1	1	1
OG0001569	2	1	1	1	1	2	1	1	1	1	1	3	1	1	1
OG0001570	1	1	1	1	1	4	2	1	1	1	1	1	1	1	1
OG0001571	1	1	1	1	1	4	1	1	1	1	1	2	1	1	1
OG0001572	1	1	1	1	1	2	3	1	1	2	1	1	1	1	1
OG0001573	1	3	1	1	1	2	2	1	1	1	1	1	1	1	1
OG0001574	1	1	4	2	1	1	1	1	1	1	1	1	1	1	1
OG0001575	1	1	1	1	1	4	1	1	1	2	1	1	1	1	1
OG0001576	1	1	1	1	1	1	1	1	1	2	4	1	1	1	1
OG0001577	2	1	1	1	2	1	1	1	2	1	1	1	2	0	2
OG0001578	1	1	1	1	1	5	1	1	1	1	1	1	1	1	1
OG0001579	1	2	1	1	2	1	2	1	1	1	1	1	2	1	1
OG0001580	1	1	1	1	1	1	1	1	1	1	5	1	1	1	1
OG0001581	1	1	1	2	1	1	1	1	1	3	0	1	2	2	1
OG0001582	1	1	2	1	1	7	1	1	0	1	1	0	1	1	0
OG0001583	1	1	1	1	1	1	4	1	1	1	1	1	2	1	1
OG0001584	3	1	1	2	0	0	1	2	2	2	1	0	1	1	2
OG0001585	1	2	1	1	1	4	1	1	1	1	1	1	1	1	1
OG0001586	2	1	2	2	1	0	1	2	1	1	2	2	0	1	1
OG0001587	1	1	1	1	1	1	1	1	1	1	1	5	1	1	1
OG0001588	1	1	1	1	1	5	1	1	1	1	1	1	1	1	1
OG0001589	1	1	1	1	0	1	3	2	1	2	1	1	1	2	1
OG0001590	1	1	1	1	2	1	1	1	1	1	1	4	1	1	1
OG0001591	1	1	1	1	1	2	3	2	1	1	1	1	1	1	1
OG0001592	1	1	2	3	1	1	1	1	1	1	3	1	1	1	0
OG0001593	2	1	1	1	1	3	1	1	1	1	0	3	1	1	1
OG0001594	2	1	1	1	1	1	2	1	1	2	2	1	2	0	1
OG0001595	1	1	1	2	1	0	1	4	1	1	1	1	1	2	1
OG0001596	2	1	1	1	1	3	2	0	0	1	2	2	1	1	1
OG0001597	2	1	1	2	1	1	1	2	1	2	1	1	1	1	1
OG0001598	1	1	1	1	1	5	1	1	1	1	1	1	1	1	1
OG0001599	1	1	1	1	2	1	1	3	1	2	0	1	1	2	1
OG0001600	1	1	2	1	1	3	1	1	1	1	1	2	1	1	1
OG0001601	1	1	1	1	1	5	1	1	1	1	1	1	1	1	1
OG0001602	1	1	1	1	0	2	3	1	1	2	1	3	1	0	1
OG0001603	1	1	1	1	1	2	2	1	1	1	1	1	3	1	1
OG0001604	1	2	1	1	1	0	1	2	1	1	1	2	3	1	1
OG0001605	1	1	1	1	1	2	1	1	1	1	1	1	1	4	1
OG0001606	1	1	1	1	1	4	1	1	1	1	1	2	1	1	1
OG0001607	2	1	1	1	1	1	1	2	2	1	1	2	1	1	1
OG0001608	1	1	1	1	2	1	1	1	1	3	1	1	1	2	1
OG0001609	1	1	1	1	1	2	1	1	2	1	2	1	1	1	2
OG0001610	2	1	1	1	1	1	1	1	1	1	2	3	1	1	1
OG0001611	1	2	1	1	2	1	1	2	1	1	1	1	1	2	1
OG0001612	1	1	1	1	1	1	1	1	1	1	3	1	1	2	2
OG0001613	1	1	1	1	1	2	1	1	1	1	1	2	1	3	1
OG0001614	1	1	2	0	4	3	1	1	1	1	0	1	1	1	1
OG0001615	1	1	1	2	1	1	1	1	4	1	1	1	1	1	1
OG0001616	1	1	1	1	1	3	1	1	1	1	1	1	1	1	3
OG0001617	1	1	1	1	1	1	1	1	1	1	1	1	1	1	5
OG0001618	1	1	2	1	1	1	1	1	1	2	1	1	1	2	2
OG0001619	1	2	2	2	1	1	1	1	1	1	0	1	1	1	3
OG0001620	1	1	1	1	2	1	1	1	1	1	3	1	1	1	2
OG0001621	1	1	1	1	3	2	1	1	1	1	1	1	2	1	1
OG0001622	1	1	1	1	1	3	1	1	1	1	1	2	1	2	1
OG0001623	5	2	2	2	1	1	1	0	1	1	1	0	0	1	1
OG0001624	1	1	1	1	1	1	5	1	1	1	1	1	1	1	1
OG0001625	1	1	1	1	3	3	1	1	1	1	1	1	1	1	1
OG0001626	1	1	2	1	1	1	1	1	1	1	1	1	4	1	1
OG0001627	1	1	1	1	1	3	1	1	2	1	1	1	1	1	2
OG0001628	1	1	1	1	1	5	1	1	0	1	2	1	1	1	1
OG0001629	1	1	1	1	2	1	1	1	1	2	1	2	1	2	1
OG0001630	1	1	1	1	1	5	1	1	1	1	1	1	1	1	1
OG0001631	1	1	1	1	1	2	1	1	2	1	1	1	3	1	1
OG0001632	1	2	2	2	2	2	0	1	0	4	1	1	0	1	0
OG0001633	1	2	1	1	1	1	2	1	1	1	3	1	1	1	1
OG0001634	1	2	1	1	1	1	1	1	1	4	1	1	1	1	1
OG0001635	1	1	1	2	2	1	1	1	1	2	1	2	1	1	1
OG0001636	1	1	1	2	2	0	1	1	1	3	1	0	1	3	1
OG0001637	1	1	1	1	1	0	0	6	1	1	1	1	2	1	1
OG0001638	1	1	1	1	1	6	1	1	1	0	1	1	1	1	1
OG0001639	1	1	1	1	2	0	1	2	1	3	1	0	3	1	1
OG0001640	2	1	1	1	1	1	3	1	1	1	1	1	1	2	1
OG0001641	4	3	1	3	0	0	3	0	1	0	2	0	1	0	1
OG0001642	1	0	0	0	3	0	0	0	0	5	2	0	0	8	0
OG0001643	1	1	1	1	1	2	2	1	2	1	1	2	1	1	1
OG0001644	1	1	1	1	1	3	2	1	1	1	1	2	1	1	1
OG0001645	1	1	1	1	2	2	1	1	1	2	1	1	1	2	1
OG0001646	1	2	2	2	1	1	1	2	1	1	1	1	1	1	1
OG0001647	1	3	2	2	1	1	1	1	1	1	1	1	1	1	1
OG0001648	1	1	1	1	1	1	3	2	1	1	1	1	1	1	2
OG0001649	1	1	1	1	1	3	1	2	1	1	1	2	1	1	1
OG0001650	2	1	1	1	1	1	1	2	1	2	1	1	1	1	2
OG0001651	1	1	1	1	1	0	1	1	1	4	2	1	2	1	1
OG0001652	1	1	2	1	2	1	1	1	1	2	3	0	0	2	1
OG0001653	1	1	1	1	1	1	1	1	3	2	1	1	1	1	2
OG0001654	1	1	1	5	1	1	1	1	1	2	1	1	1	0	1
OG0001655	2	1	1	1	1	1	2	1	1	2	1	1	2	1	1
OG0001656	1	1	1	1	3	2	2	1	1	1	1	1	1	1	1
OG0001657	2	1	1	1	1	1	1	3	1	1	1	1	1	1	2
OG0001658	1	1	2	2	1	1	1	1	1	2	1	1	1	2	1
OG0001659	1	2	2	1	1	2	1	1	1	1	1	1	1	1	2
OG0001660	1	1	1	1	1	5	1	2	0	1	1	1	1	1	1
OG0001661	1	2	3	1	1	0	1	1	1	1	1	3	1	1	1
OG0001662	1	1	1	1	0	4	1	1	1	1	1	3	1	1	1
OG0001663	1	1	1	1	3	1	1	1	1	2	1	2	1	1	1
OG0001664	1	1	1	1	1	4	1	1	1	1	1	2	1	1	1
OG0001665	1	1	2	1	1	1	1	1	1	4	2	1	0	1	1
OG0001666	1	1	2	3	1	2	1	1	1	1	1	1	1	1	1
OG0001667	1	1	1	1	1	1	1	1	1	0	1	1	1	6	1
OG0001668	1	1	1	1	2	2	2	1	1	2	1	1	1	1	1
OG0001669	1	1	1	1	2	4	1	1	1	1	1	1	1	1	1
OG0001670	1	1	1	1	1	1	1	1	1	1	1	4	2	1	1
OG0001671	1	1	1	1	2	2	1	3	1	1	1	1	1	1	1
OG0001672	1	1	1	1	1	2	3	1	1	1	1	1	2	1	1
OG0001673	1	1	1	1	1	1	1	1	3	1	1	1	1	1	3
OG0001674	1	1	2	2	1	0	0	1	1	1	3	0	3	2	1
OG0001675	1	1	1	1	1	1	1	3	1	2	1	1	1	2	1
OG0001676	1	1	1	1	1	1	2	1	2	2	1	1	2	1	1
OG0001677	1	1	1	1	1	3	1	2	1	1	1	2	1	1	1
OG0001678	1	1	1	1	1	4	1	1	1	1	1	1	1	2	1
OG0001679	1	1	1	1	1	2	1	2	1	2	1	2	1	1	1
OG0001680	1	1	1	1	1	3	1	1	1	1	1	1	1	3	1
OG0001681	1	1	1	1	1	2	1	1	2	1	1	2	2	1	1
OG0001682	1	1	1	1	2	1	1	3	1	1	1	1	1	2	1
OG0001683	1	1	4	1	1	1	1	1	1	1	1	2	1	1	1
OG0001684	1	1	1	1	3	1	2	1	1	1	1	2	1	1	1
OG0001685	2	1	2	1	0	1	1	2	2	1	1	1	0	2	2
OG0001686	1	1	1	1	1	4	1	1	1	1	1	1	2	1	1
OG0001687	1	1	2	1	1	1	1	2	1	3	1	1	1	1	1
OG0001688	1	1	1	1	1	3	1	1	1	1	1	3	1	1	1
OG0001689	1	1	1	1	1	1	0	2	0	1	9	0	1	0	0
OG0001690	2	1	1	1	1	2	2	1	1	2	1	1	1	1	1
OG0001691	1	1	3	1	1	1	2	2	1	1	1	1	0	1	2
OG0001692	1	2	1	1	1	1	1	2	1	2	1	2	1	1	1
OG0001693	1	1	1	1	1	1	2	1	1	1	4	1	1	1	1
OG0001694	1	1	1	1	1	2	1	1	1	3	1	2	1	1	1
OG0001695	1	1	4	1	1	1	1	1	1	2	1	1	1	1	1
OG0001696	1	1	1	1	1	1	1	1	1	1	1	1	1	5	1
OG0001697	1	1	1	1	1	2	1	2	1	1	1	2	1	1	2
OG0001698	1	1	1	1	1	1	3	3	1	1	1	1	1	1	1
OG0001699	2	3	1	1	1	1	1	1	1	1	2	1	1	1	1
OG0001700	1	2	1	3	1	1	1	1	2	1	1	1	1	1	1
OG0001701	1	1	1	1	1	3	2	1	2	1	1	1	1	1	1
OG0001702	1	1	1	1	1	5	1	1	1	1	1	1	1	1	1
OG0001703	1	1	1	1	1	3	1	3	1	1	1	1	0	2	1
OG0001704	1	1	0	1	0	0	3	0	3	0	0	0	0	0	10
OG0001705	1	2	2	1	1	1	1	1	1	3	1	1	1	1	1
OG0001706	2	0	0	0	0	7	0	10	0	0	0	0	0	0	0
OG0001707	0	6	12	0	0	0	0	0	0	0	1	0	0	0	0
OG0001708	0	1	5	1	0	0	0	4	0	1	0	1	3	3	0
OG0001709	0	1	1	1	2	1	1	3	1	2	0	1	2	2	1
OG0001710	0	3	5	5	0	0	3	0	1	0	0	1	0	0	1
OG0001711	0	1	2	1	1	2	1	1	1	1	1	1	2	3	1
OG0001712	0	1	3	1	2	1	1	1	1	4	1	0	1	1	1
OG0001713	0	1	1	1	1	4	1	1	1	2	1	1	2	1	1
OG0001714	0	3	3	4	2	0	2	1	1	0	1	0	0	2	0
OG0001715	0	1	0	0	2	0	2	3	0	4	2	0	0	5	0
OG0001716	0	0	1	0	0	17	0	0	0	0	0	1	0	0	0
OG0001717	0	0	3	0	0	5	1	4	0	0	0	1	1	1	3
OG0001718	0	0	1	1	3	1	1	1	0	3	1	1	3	1	2
OG0001719	0	0	1	5	0	3	1	2	0	1	1	0	2	0	3
OG0001720	0	0	0	1	4	4	0	3	0	3	0	0	4	0	0
OG0001721	0	0	0	0	17	0	0	0	0	1	0	0	0	1	0
OG0001722	0	0	0	0	18	0	0	0	0	0	0	0	1	0	0
OG0001723	0	0	0	0	6	0	0	0	0	11	0	0	0	2	0
OG0001724	0	0	0	0	13	0	0	0	0	1	0	0	0	5	0
OG0001725	0	0	0	0	19	0	0	0	0	0	0	0	0	0	0
OG0001726	0	0	0	0	19	0	0	0	0	0	0	0	0	0	0
OG0001727	0	0	0	0	17	0	0	0	0	2	0	0	0	0	0
OG0001728	0	0	0	0	1	0	0	0	0	1	0	0	0	17	0
OG0001729	0	0	0	0	1	0	0	18	0	0	0	0	0	0	0
OG0001730	0	0	0	0	2	4	0	0	0	3	0	4	2	4	0
OG0001731	0	0	0	0	4	4	0	0	0	6	2	1	0	2	0
OG0001732	0	0	0	0	0	19	0	0	0	0	0	0	0	0	0
OG0001733	0	0	0	0	0	19	0	0	0	0	0	0	0	0	0
OG0001734	0	0	0	0	0	19	0	0	0	0	0	0	0	0	0
OG0001735	0	0	0	0	0	19	0	0	0	0	0	0	0	0	0
OG0001736	0	0	0	0	0	19	0	0	0	0	0	0	0	0	0
OG0001737	0	0	0	0	0	15	0	1	0	0	0	1	1	0	1
OG0001738	0	0	0	0	0	2	5	0	3	5	0	0	0	0	4
OG0001739	0	0	0	0	0	3	0	0	0	10	0	2	2	2	0
OG0001740	0	0	0	0	0	0	5	0	1	0	0	5	2	0	6
OG0001741	0	0	0	0	0	0	1	0	0	0	3	0	15	0	0
OG0001742	0	0	0	0	0	0	1	4	4	1	0	0	1	2	6
OG0001743	0	0	0	0	0	0	0	1	0	1	17	0	0	0	0
OG0001744	0	0	0	0	0	0	0	0	0	19	0	0	0	0	0
OG0001745	0	0	0	0	0	0	0	0	0	0	0	19	0	0	0
OG0001746	0	0	0	0	0	0	0	0	0	0	0	19	0	0	0
OG0001747	1	1	1	1	1	1	2	1	1	1	1	1	3	1	1
OG0001748	1	1	1	1	1	3	1	1	1	1	1	2	1	1	1
OG0001749	1	1	1	2	1	0	1	2	1	2	1	0	1	3	1
OG0001750	1	1	1	1	1	4	1	1	1	1	1	1	1	1	1
OG0001751	2	1	1	1	1	1	1	2	1	2	1	1	1	1	1
OG0001752	1	1	1	1	1	1	1	1	1	1	1	1	1	1	4
OG0001753	1	1	1	1	1	1	1	1	1	4	1	1	1	1	1
OG0001754	1	2	1	2	1	0	1	1	1	1	1	1	1	1	3
OG0001755	1	1	1	1	1	1	1	2	2	1	1	1	1	1	2
OG0001756	1	1	1	1	1	2	1	1	2	1	1	1	1	1	2
OG0001757	3	1	1	1	1	1	2	1	1	1	1	1	1	1	1
OG0001758	2	2	1	1	1	1	1	1	1	1	1	1	2	1	1
OG0001759	1	1	1	1	1	2	1	2	1	1	1	2	1	1	1
OG0001760	1	1	1	1	1	1	1	2	1	1	1	1	3	1	1
OG0001761	1	1	1	1	1	1	2	1	1	1	1	2	1	2	1
OG0001762	1	1	1	1	1	4	1	0	1	1	2	1	1	1	1
OG0001763	1	1	1	1	3	2	1	1	1	1	1	1	1	1	1
OG0001764	1	1	1	1	1	1	1	1	1	1	2	2	2	1	1
OG0001765	1	2	3	1	1	1	1	1	1	1	1	1	1	1	1
OG0001766	1	1	1	1	1	3	2	1	1	1	1	1	1	1	1
OG0001767	1	1	1	2	1	2	1	1	1	1	1	2	1	1	1
OG0001768	1	1	1	1	2	1	1	1	2	2	1	1	1	1	1
OG0001769	2	1	1	1	1	2	1	1	1	1	1	2	1	1	1
OG0001770	1	1	1	1	1	1	4	1	1	1	1	1	1	1	1
OG0001771	1	1	1	1	1	3	1	1	1	1	1	2	1	1	1
OG0001772	2	5	3	2	0	1	0	0	0	2	0	3	0	0	0
OG0001773	1	1	1	1	1	1	2	1	2	1	1	1	1	2	1
OG0001774	1	1	1	1	1	1	3	1	2	1	1	1	1	1	1
OG0001775	1	1	1	1	1	1	3	1	2	1	1	1	1	1	1
OG0001776	1	1	1	1	1	1	1	4	1	1	1	1	1	1	1
OG0001777	1	1	2	1	1	1	1	2	1	2	1	1	1	1	1
OG0001778	1	1	1	1	1	1	1	1	2	1	1	1	1	2	2
OG0001779	1	1	1	1	3	1	1	1	1	1	1	1	1	2	1
OG0001780	1	1	1	1	1	4	1	1	1	1	1	1	1	1	1
OG0001781	1	1	1	1	3	1	1	1	1	1	1	1	1	2	1
OG0001782	1	1	1	1	2	2	1	1	1	1	1	2	1	1	1
OG0001783	1	1	1	1	1	4	1	1	1	1	1	1	1	1	1
OG0001784	1	1	1	2	1	1	2	1	2	1	1	1	1	1	1
OG0001785	2	1	2	1	1	1	1	2	1	1	1	1	1	1	1
OG0001786	1	1	1	1	1	1	2	1	1	1	1	2	1	2	1
OG0001787	1	1	1	1	4	2	1	1	1	0	1	1	1	1	1
OG0001788	1	1	4	1	1	1	1	1	1	1	1	1	1	1	1
OG0001789	1	1	1	1	1	1	1	1	1	2	1	2	2	1	1
OG0001790	1	1	1	1	1	4	1	1	1	1	1	1	1	1	1
OG0001791	1	1	1	1	1	1	1	1	2	1	1	1	1	1	3
OG0001792	1	1	1	1	1	1	1	1	3	0	1	1	1	1	3
OG0001793	2	0	0	0	5	0	1	1	0	1	2	0	2	3	1
OG0001794	1	1	1	1	3	1	1	1	1	1	2	1	1	1	1
OG0001795	1	2	1	1	1	2	1	1	1	1	1	2	1	1	1
OG0001796	2	1	3	1	1	1	1	1	0	1	2	1	1	1	1
OG0001797	1	1	1	1	1	1	2	4	1	1	1	1	1	0	1
OG0001798	1	1	1	1	1	4	1	1	1	1	1	1	1	1	1
OG0001799	1	1	1	1	1	2	3	1	1	1	1	1	1	1	1
OG0001800	1	1	0	1	1	3	1	1	2	1	0	1	2	1	2
OG0001801	1	1	1	1	1	3	1	1	1	1	1	2	1	1	1
OG0001802	1	2	2	2	1	2	1	1	1	1	1	1	0	1	1
OG0001803	1	1	1	1	1	1	1	1	2	1	1	1	1	1	3
OG0001804	2	1	1	2	0	0	1	1	2	1	1	2	1	1	2
OG0001805	1	2	1	1	2	1	1	1	1	1	1	1	2	1	1
OG0001806	1	1	1	1	1	1	3	1	1	1	1	1	1	2	1
OG0001807	4	1	1	1	1	0	1	1	1	3	0	0	1	2	1
OG0001808	1	1	1	1	1	1	1	1	1	2	2	2	1	1	1
OG0001809	1	3	3	3	0	0	2	0	2	0	2	0	0	0	2
OG0001810	1	2	1	1	1	2	1	1	1	1	1	2	1	1	1
OG0001811	1	1	1	1	1	4	1	1	1	1	1	1	1	1	1
OG0001812	1	2	2	1	1	1	1	1	1	1	1	2	1	1	1
OG0001813	1	1	1	1	2	1	1	1	1	2	1	1	1	2	1
OG0001814	2	1	1	1	1	1	2	1	1	1	2	1	1	1	1
OG0001815	1	1	1	1	1	1	1	1	3	1	1	1	1	1	2
OG0001816	1	2	2	2	1	1	1	1	1	1	1	1	1	1	1
OG0001817	3	1	1	2	0	1	1	1	1	1	1	1	1	1	2
OG0001818	1	1	1	1	1	3	1	2	1	1	1	1	1	1	1
OG0001819	1	1	1	1	1	1	2	1	0	4	1	1	1	1	1
OG0001820	1	1	1	1	0	4	1	1	1	1	1	2	1	1	1
OG0001821	1	1	1	1	1	1	1	1	0	2	1	1	1	4	1
OG0001822	1	2	1	1	1	1	2	1	1	1	1	1	2	1	1
OG0001823	1	1	3	1	1	1	1	1	1	1	1	2	1	1	1
OG0001824	1	1	1	1	1	3	1	1	1	1	1	1	2	1	1
OG0001825	1	1	1	1	1	4	1	1	1	1	1	1	1	1	1
OG0001826	2	1	3	1	1	1	1	1	1	1	1	1	1	1	1
OG0001827	4	3	5	2	0	0	0	0	0	0	4	0	0	0	0
OG0001828	1	1	1	1	2	2	1	2	1	1	1	1	1	1	1
OG0001829	1	1	1	1	1	2	1	1	1	1	1	3	1	1	1
OG0001830	1	1	2	1	1	1	1	1	1	0	1	3	1	2	1
OG0001831	1	0	0	0	2	0	1	1	0	2	2	2	3	4	0
OG0001832	1	1	3	1	1	2	1	1	1	1	1	1	1	1	1
OG0001833	1	1	3	1	1	1	1	1	1	1	1	1	2	1	1
OG0001834	1	1	1	1	4	0	0	1	3	1	1	0	1	1	2
OG0001835	1	1	1	1	1	1	1	1	1	2	1	2	2	1	1
OG0001836	1	1	1	1	2	1	1	1	2	1	1	1	1	1	2
OG0001837	1	1	1	1	1	2	2	1	1	1	1	1	2	1	1
OG0001838	1	1	1	1	1	2	3	1	0	2	1	1	1	1	1
OG0001839	1	1	2	1	1	1	2	1	1	1	1	0	2	1	2
OG0001840	1	1	2	2	1	2	1	1	1	1	1	1	1	1	1
OG0001841	1	1	1	1	1	1	1	1	1	1	1	2	3	1	1
OG0001842	1	2	2	2	1	1	1	1	1	1	1	1	1	1	1
OG0001843	1	1	1	1	1	1	2	1	1	2	1	1	1	2	1
OG0001844	1	1	1	1	1	1	1	1	1	1	1	1	2	1	3
OG0001845	1	1	1	1	2	2	1	1	1	1	1	2	1	1	1
OG0001846	3	1	1	1	1	1	1	1	2	1	1	1	1	1	1
OG0001847	1	2	2	1	1	1	2	1	1	1	1	1	1	1	1
OG0001848	1	1	1	1	1	4	1	1	1	1	1	1	1	1	1
OG0001849	1	1	1	1	1	3	2	1	1	2	0	1	1	1	1
OG0001850	1	1	1	1	1	2	2	1	1	2	1	1	1	1	1
OG0001851	1	1	2	1	3	1	1	1	1	1	1	1	1	1	1
OG0001852	1	2	1	1	0	1	1	1	1	3	0	3	1	1	1
OG0001853	1	1	1	1	1	1	4	1	1	1	1	1	1	1	1
OG0001854	1	1	1	1	1	3	1	1	1	2	1	1	1	1	1
OG0001855	1	1	1	1	1	4	1	1	1	1	1	1	1	1	1
OG0001856	1	2	2	1	1	0	1	1	1	2	1	0	1	1	3
OG0001857	1	1	1	1	1	3	2	1	1	1	1	0	1	2	1
OG0001858	1	1	1	1	1	2	2	1	2	1	1	1	1	1	1
OG0001859	2	1	1	1	1	2	2	1	1	1	1	1	1	1	1
OG0001860	2	1	2	1	1	0	1	1	1	1	2	2	1	1	1
OG0001861	1	1	1	1	2	2	1	1	1	1	1	2	1	1	1
OG0001862	1	1	1	1	1	1	1	1	3	1	1	1	1	1	2
OG0001863	1	1	1	1	1	2	1	1	1	1	1	3	1	1	1
OG0001864	1	1	1	1	2	1	1	1	1	1	1	1	1	3	1
OG0001865	1	1	2	1	1	2	1	2	1	1	1	1	1	1	1
OG0001866	1	1	1	1	1	1	1	1	3	1	1	1	1	1	2
OG0001867	1	1	1	1	1	1	1	2	2	2	1	1	1	1	1
OG0001868	1	1	1	1	1	2	1	1	2	2	1	1	1	1	1
OG0001869	1	1	1	1	1	1	1	1	2	1	1	1	2	1	2
OG0001870	1	1	1	1	2	1	1	1	1	2	1	1	1	2	1
OG0001871	1	3	8	3	0	0	0	0	1	0	1	0	0	0	1
OG0001872	1	1	1	1	0	2	2	1	3	1	1	1	1	1	1
OG0001873	1	1	1	1	1	1	1	1	3	1	1	2	1	1	1
OG0001874	1	1	1	1	1	1	1	1	3	1	1	2	1	1	1
OG0001875	1	1	1	1	2	2	1	1	1	1	1	2	1	1	1
OG0001876	1	1	2	2	1	1	1	1	1	2	1	1	1	1	1
OG0001877	1	1	1	1	1	0	2	2	2	1	1	0	1	1	3
OG0001878	1	2	1	1	1	1	1	1	1	1	1	1	1	1	3
OG0001879	1	1	1	1	1	1	2	3	1	1	1	1	1	1	1
OG0001880	1	1	1	1	0	3	1	3	1	1	1	1	1	1	1
OG0001881	1	1	1	1	1	3	1	1	1	1	1	1	1	2	1
OG0001882	1	2	1	1	1	1	1	1	1	2	1	1	2	1	1
OG0001883	1	1	1	1	1	1	1	1	1	1	1	4	1	1	1
OG0001884	1	1	1	1	1	4	1	1	1	1	1	1	1	1	1
OG0001885	1	1	1	1	1	1	1	1	1	2	1	1	3	1	1
OG0001886	1	1	1	1	1	3	1	1	1	1	1	2	1	1	1
OG0001887	1	1	1	1	1	4	1	1	1	1	1	1	1	1	1
OG0001888	1	1	1	1	1	2	1	2	1	1	1	2	1	1	1
OG0001889	2	1	1	1	1	1	1	3	1	1	1	1	1	1	1
OG0001890	1	1	1	1	1	4	1	1	1	1	1	1	1	1	1
OG0001891	1	2	1	1	1	1	2	1	1	1	1	1	2	1	1
OG0001892	1	1	1	1	1	0	1	1	3	1	4	0	1	1	1
OG0001893	1	1	1	1	1	1	1	1	4	1	1	1	1	1	1
OG0001894	1	2	1	1	2	1	1	1	1	1	2	1	1	1	1
OG0001895	1	1	1	1	1	4	1	1	1	1	1	1	1	1	1
OG0001896	1	1	1	1	2	1	1	2	1	1	1	1	1	1	2
OG0001897	1	1	1	1	1	2	3	1	1	1	1	1	1	1	1
OG0001898	1	1	1	1	1	1	1	1	2	2	1	1	1	1	2
OG0001899	1	1	1	1	1	0	1	1	3	1	1	1	0	1	4
OG0001900	1	1	2	1	1	2	2	1	1	2	1	1	1	0	1
OG0001901	1	1	1	1	1	4	1	1	1	1	1	1	1	1	1
OG0001902	1	1	3	1	0	3	1	1	1	1	1	1	1	1	1
OG0001903	1	1	1	1	1	1	1	1	1	2	3	1	1	1	1
OG0001904	1	1	1	1	1	3	1	1	1	3	0	1	1	1	1
OG0001905	1	1	2	1	1	3	1	1	1	1	1	1	1	1	1
OG0001906	1	1	1	1	1	3	1	1	1	2	1	1	1	1	1
OG0001907	1	1	1	1	0	2	1	1	3	1	1	2	1	1	1
OG0001908	2	1	1	1	1	1	1	1	1	1	1	1	2	1	2
OG0001909	1	1	1	1	1	3	2	1	1	1	1	1	1	1	1
OG0001910	1	1	1	2	1	1	1	1	1	2	1	1	1	2	1
OG0001911	1	1	3	1	1	2	1	1	1	1	1	1	1	1	1
OG0001912	1	1	3	1	1	1	3	1	0	1	1	1	1	1	1
OG0001913	1	2	1	1	2	1	1	1	1	2	1	1	1	1	1
OG0001914	1	4	1	1	1	1	1	1	1	1	1	1	1	1	1
OG0001915	1	1	1	1	2	1	2	1	1	2	1	1	1	1	1
OG0001916	1	1	2	1	1	3	1	1	1	1	1	1	1	1	1
OG0001917	1	1	1	1	1	1	2	1	1	1	1	2	2	1	1
OG0001918	1	1	1	1	2	0	1	2	1	3	1	0	1	2	1
OG0001919	1	1	1	1	1	2	2	1	2	1	1	1	1	1	1
OG0001920	1	1	1	1	1	1	1	1	4	1	1	1	1	1	1
OG0001921	1	1	1	1	1	1	1	1	2	1	1	1	3	1	1
OG0001922	1	1	1	1	2	1	1	1	1	2	1	1	1	2	1
OG0001923	1	2	1	1	2	2	1	1	1	1	1	1	1	1	1
OG0001924	3	1	1	1	1	2	1	1	1	1	1	1	1	1	1
OG0001925	2	1	1	1	2	1	1	1	1	1	2	1	1	1	1
OG0001926	1	1	1	1	1	5	2	1	1	1	1	0	1	0	1
OG0001927	1	1	1	1	1	1	3	2	1	1	1	1	1	1	1
OG0001928	1	1	1	1	1	1	3	1	1	1	1	3	0	1	1
OG0001929	1	1	1	1	1	1	1	1	1	1	1	4	1	1	1
OG0001930	1	1	1	1	1	1	1	1	1	1	3	2	1	1	1
OG0001931	2	1	1	1	1	1	1	2	1	1	1	1	1	1	2
OG0001932	1	1	1	1	1	4	1	1	1	1	1	1	1	1	1
OG0001933	1	1	1	1	1	4	1	1	1	1	1	1	1	1	1
OG0001934	1	1	1	1	1	3	1	1	2	1	1	1	1	1	1
OG0001935	2	1	1	1	0	2	1	3	1	0	2	1	2	0	1
OG0001936	2	1	1	1	1	1	1	1	1	1	2	1	1	2	1
OG0001937	1	1	1	2	3	1	1	1	1	1	1	1	1	1	1
OG0001938	1	2	2	2	1	0	1	2	1	1	2	0	1	1	1
OG0001939	1	1	2	1	1	1	1	1	2	2	1	1	1	1	1
OG0001940	1	1	1	1	1	2	1	1	1	1	1	1	1	3	1
OG0001941	1	1	1	1	0	1	1	1	1	2	1	4	1	1	1
OG0001942	1	1	0	1	1	5	1	1	1	1	0	2	1	1	1
OG0001943	1	1	1	1	0	0	1	1	4	1	1	1	1	1	3
OG0001944	1	1	1	3	1	1	2	1	1	1	1	1	1	1	1
OG0001945	1	1	1	1	2	1	1	1	1	1	1	2	1	2	1
OG0001946	1	1	1	1	1	1	2	1	1	2	1	1	1	2	1
OG0001947	2	1	1	1	1	1	2	1	1	1	1	2	1	1	1
OG0001948	1	1	2	2	1	1	2	1	1	1	1	1	1	1	1
OG0001949	2	1	1	1	4	0	0	2	1	3	0	0	0	2	1
OG0001950	1	1	1	1	3	1	1	1	1	1	2	1	1	1	1
OG0001951	1	1	1	1	1	1	2	1	1	1	1	3	1	1	1
OG0001952	1	1	1	2	1	1	2	1	1	1	2	1	1	1	1
OG0001953	1	1	1	1	1	3	2	1	1	1	1	1	1	1	1
OG0001954	1	1	1	1	0	5	1	1	1	1	1	1	1	1	1
OG0001955	2	2	1	1	2	1	1	1	1	1	1	1	1	1	1
OG0001956	1	2	2	1	2	0	1	0	1	1	1	1	1	2	2
OG0001957	1	1	1	1	4	1	1	1	0	2	1	1	1	1	1
OG0001958	1	1	1	2	1	1	1	1	1	1	1	1	2	2	1
OG0001959	1	1	1	1	2	3	1	1	1	1	1	1	1	1	1
OG0001960	1	1	1	1	2	1	1	1	1	2	1	1	2	1	1
OG0001961	1	1	1	1	1	4	1	1	1	1	1	1	1	1	1
OG0001962	1	0	3	9	0	0	3	1	0	0	1	0	0	0	0
OG0001963	1	3	2	1	1	1	1	2	1	1	1	1	0	1	1
OG0001964	1	1	1	1	1	1	2	1	2	1	1	1	1	1	2
OG0001965	2	1	2	1	2	1	5	0	0	1	0	0	0	3	0
OG0001966	1	2	2	1	1	1	2	1	1	1	1	1	1	1	1
OG0001967	1	1	1	1	1	2	1	1	1	2	2	1	1	1	1
OG0001968	2	1	2	1	1	1	1	1	1	1	1	2	1	1	1
OG0001969	1	1	1	1	2	1	1	2	1	1	1	1	2	1	1
OG0001970	3	1	2	1	1	1	1	1	1	1	1	1	1	1	1
OG0001971	1	1	1	1	1	1	3	1	1	2	1	1	1	1	1
OG0001972	1	1	1	1	1	1	1	1	2	1	1	1	1	1	3
OG0001973	1	0	4	1	1	0	1	1	2	1	3	0	1	1	1
OG0001974	1	1	1	1	1	1	1	1	1	1	2	1	1	3	1
OG0001975	3	0	0	0	2	0	0	2	0	2	3	4	1	1	0
OG0001976	1	1	1	1	1	2	3	1	1	1	1	1	1	1	1
OG0001977	1	1	1	1	1	2	3	1	1	1	1	1	1	1	1
OG0001978	1	1	1	1	1	1	3	1	1	1	1	1	1	2	1
OG0001979	1	1	1	1	3	1	1	1	1	2	1	1	0	2	1
OG0001980	1	1	3	1	2	1	1	1	1	2	0	1	1	1	1
OG0001981	1	1	1	1	1	1	1	2	1	1	1	1	1	3	1
OG0001982	1	1	1	1	1	1	1	1	1	3	1	2	1	1	1
OG0001983	2	1	2	1	1	1	1	1	1	0	1	1	2	1	2
OG0001984	1	1	1	1	1	1	1	1	1	2	3	0	1	2	1
OG0001985	2	1	1	1	1	1	1	2	1	2	1	1	1	1	1
OG0001986	1	1	1	1	1	4	1	1	1	1	1	1	1	1	1
OG0001987	2	1	2	1	1	0	2	2	1	1	1	0	1	1	2
OG0001988	1	2	1	1	1	2	1	1	0	3	1	1	1	1	1
OG0001989	1	2	1	1	1	0	1	3	1	2	1	0	1	2	1
OG0001990	2	1	2	2	1	0	1	1	1	2	2	0	1	1	1
OG0001991	1	2	2	4	0	0	2	0	1	0	2	0	2	0	2
OG0001992	1	1	1	1	1	5	1	1	1	0	1	1	1	1	1
OG0001993	1	1	1	1	1	1	1	1	1	4	1	1	1	1	1
OG0001994	1	1	1	1	0	2	1	1	1	4	2	0	1	1	1
OG0001995	1	1	1	1	1	1	2	1	1	1	1	3	1	1	1
OG0001996	1	1	2	1	1	1	1	1	2	1	1	1	1	1	2
OG0001997	2	2	1	1	1	2	1	1	1	1	1	1	1	1	1
[truncated: 14,146 more rows]

## Sheet: Table S5
Table S5. Gene function of obviously expanded gene family in Wolfiporia hoelen
Orthogroup	Antsi	Daequ	Fompi	Fomros	Gansi	Lacbi	Laesu	Obbri	Pahoe	Polsqu	Pospl	Schco	Spalat	Trave	Wolco	Functional annotation
OG0000016	10	20	16	11	6	1	21	4	23	5	6	0	11	16	18	unknown
OG0000979	0	0	0	0	0	0	4	0	21	0	0	0	0	0	0	Signal transduction mechanisms/Cell cycle control, cell division, chromosome partitioning	GO:0006468(protein phosphorylation)	GO:0004672(protein kinase activity),GO:0005524(ATP binding)	K06668 GIN4; serine/threonine-protein kinase GIN4 [EC:2.7.11.-]
OG0000015	35	22	18	18	0	0	23	5	19	0	13	0	0	0	18	unknown
OG0000028	22	27	7	13	2	1	10	2	17	4	10	1	5	2	19	Secondary metabolites biosynthesis, transport and catabolism	GO:0055114(oxidation-reduction process)	GO:0005506(iron ion binding),GO:0016705(oxidoreductase activity, acting on paired donors, with incorporation or reduction of molecular oxygen),GO:0020037(heme binding)
OG0000295	1	0	0	0	0	0	1	0	16	0	1	0	0	0	29			GO:0005515(protein binding)
OG0000317	1	3	2	0	0	2	6	0	16	3	1	0	1	2	9	Signal transduction mechanisms	GO:0006468(protein phosphorylation)/GO:0006304(DNA modification)	GO:0003677(DNA binding),GO:0003824(catalytic activity)
OG0000726	1	1	1	1	1	0	1	1	15	1	2	1	1	1	1	Carbohydrate transport and metabolism	GO:0005975(carbohydrate metabolic process)	GO:0016853(isomerase activity),GO:0003824(catalytic activity),GO:0030246(carbohydrate binding)	K01785 galM, GALM; aldose 1-epimerase [EC:5.1.3.3]
OG0000011	6	4	6	6	7	15	6	70	14	11	4	7	2	12	13	unknown
OG0000287	1	0	0	0	2	3	4	2	14	1	5	0	2	0	15	unknown
OG0000000	44	27	23	24	21	13	73	61	13	44	23	10	33	15	16			GO:0005515(protein binding)
OG0000032	12	19	17	10	7	4	14	4	13	14	7	2	0	1	15	unknown
OG0000022	14	9	7	8	29	6	17	7	12	10	15	3	3	7	11	Secondary metabolites biosynthesis, transport and catabolism; Lipid transport and metabolism	GO:0055114(oxidation-reduction process)	GO:0005506(iron ion binding),GO:0016705(oxidoreductase activity, acting on paired donors, with incorporation or reduction of molecular oxygen),GO:0020037(heme binding),GO:0004497(monooxygenase activity)	K21292 CYP503; ent-kaurene oxidase [EC:1.14.14.86]
OG0000036	11	14	10	19	2	5	14	0	12	4	10	2	11	5	11	unknown
OG0000039	15	6	8	20	3	0	45	1	12	2	4	0	3	1	7	unknown
OG0000030	19	9	8	8	0	6	12	28	11	0	16	0	8	0	16		GO:0005525(GTP binding)
OG0000045	10	9	12	9	9	4	7	6	11	4	7	8	7	7	12	Secondary metabolites biosynthesis, transport and catabolism
OG0000275	5	5	4	3	1	6	0	0	11	0	2	1	1	0	11		GO:0055114(oxidation-reduction process)	GO:0005515(protein binding),GO:0016491(oxidoreductase activity)
OG0000367	0	1	1	5	0	3	4	5	11	4	0	0	1	2	6	unknown
OG0006240	0	0	0	0	0	0	0	0	11	0	0	0	0	0	4	unknown
OG0000003	18	7	9	8	21	0	15	144	10	11	13	0	11	20	18	unknown
OG0000057	10	12	11	13	5	0	4	6	10	3	14	2	2	7	9		GO:0006508(proteolysis)	GO:0008236(serine-type peptidase activity),GO:0004252(serine-type endopeptidase activity)	K01279 TPP1, CLN2; tripeptidyl-peptidase I [EC:3.4.14.9]
OG0000552	1	2	2	2	1	0	1	1	10	1	1	0	1	1	9	unknown
OG0002625	0	0	1	0	0	0	0	0	10	1	0	0	0	0	5	unknown
OG0007502	0	0	0	0	0	0	0	0	10	0	0	0	0	0	3			GO:0043565(sequence-specific DNA binding),GO:0003677(DNA binding)	K03627 MBF1; putative transcription factor
OG0000791	0	4	0	0	0	0	2	0	9	1	0	0	0	1	11	unknown
OG0002036	0	0	1	0	0	0	0	0	9	0	0	0	0	0	8	unknown
OG0006241	0	0	0	0	0	0	0	0	9	0	0	0	0	0	6	Signal transduction mechanisms/Cytoskeleton	GO:0006468(protein phosphorylation)	GO:0004672(protein kinase activity),GO:0005524(ATP binding)	K00870 E2.7.1.37; protein kinase [EC:2.7.1.37]/K04441 P38; p38 MAP kinase [EC:2.7.11.24]/K04416 MAP3K1, MEKK1; mitogen-activated protein kinase kinase kinase 1 [EC:2.7.11.25]
OG0008166	0	0	0	0	0	0	0	0	9	0	0	0	0	0	1	unknown
OG0008393	0	0	0	0	0	0	0	0	9	0	0	0	0	0	0	Secondary metabolites biosynthesis, transport and catabolism; Lipid transport and metabolism	GO:0055114(oxidation-reduction process)	GO:0005506(iron ion binding),GO:0016705(oxidoreductase activity, acting on paired donors, with incorporation or reduction of molecular oxygen),GO:0020037(heme binding),GO:0004497(monooxygenase activity)
OG0000600	1	1	2	1	2	4	2	1	8	1	1	2	1	1	4	unknown
OG0000780	1	0	0	0	1	6	3	0	8	1	3	1	1	1	2	General function prediction only/Intracellular trafficking, secretion, and vesicular transport	GO:0005515(protein binding)
OG0000457	0	0	0	0	0	0	0	0	7	0	0	0	0	0	31		GO:0005515(protein binding)
OG0000752	0	0	0	0	0	0	0	0	7	0	0	0	0	0	22	Intracellular trafficking, secretion, and vesicular transport			K12172 RANBP2, NUP358; E3 SUMO-protein ligase RanBP2
OG0002254	4	0	0	0	0	0	0	0	6	0	1	0	0	0	6	unknown
OG0003673	0	1	0	0	0	0	0	0	6	0	0	0	0	0	9	unknown
OG0006226	0	0	0	0	0	1	1	1	6	0	1	0	0	0	5	unknown
OG0007090	0	0	0	0	0	2	0	0	6	0	0	0	0	0	6		GO:0006468(protein phosphorylation)	GO:0004672(protein kinase activity),GO:0005524(ATP binding)
OG0007098	0	0	0	0	0	0	0	0	6	0	0	0	0	0	8	Secondary metabolites biosynthesis, transport and catabolism	GO:0055114(oxidation-reduction process)	GO:0005506(iron ion binding),GO:0016705(oxidoreductase activity, acting on paired donors, with incorporation or reduction of molecular oxygen),GO:0020037(heme binding)
OG0008167	0	0	0	0	0	0	0	0	6	0	0	0	0	0	4	unknown
OG0008168	0	0	0	0	0	0	0	0	6	0	0	0	0	0	4	unknown
OG0008694	0	0	0	0	0	0	0	0	6	0	0	0	0	0	2			GO:0003676(nucleic acid binding),GO:0008270(zinc ion binding)
OG0009520	0	0	0	0	0	0	0	0	6	0	0	0	0	0	0	unknown
OG0001101	1	1	1	1	1	1	2	2	5	1	0	1	1	1	4		GO:0055114(oxidation-reduction process)	GO:0051920(peroxiredoxin activity)
OG0003706	0	0	0	0	0	0	0	0	5	0	0	0	0	0	11	unknown
OG0008388	0	0	0	0	0	0	0	2	5	1	0	0	1	0	0	unknown
OG0008394	0	0	0	0	0	0	0	0	5	0	0	0	0	0	4		GO:0006355(regulation of transcription, DNA-templated)	GO:0005634(nucleus)	GO:0000981(DNA-binding transcription factor activity, RNA polymerase II-specific),GO:0008270(zinc ion binding)
OG0008696	0	0	0	0	0	0	0	0	5	0	0	0	0	0	3	Signal transduction mechanisms	GO:0006468(protein phosphorylation)	GO:0004672(protein kinase activity),GO:0005524(ATP binding)
OG0008701	0	0	0	0	0	0	0	0	5	0	0	0	0	0	3	unknown
OG0009524	0	0	0	0	0	0	0	0	5	0	1	0	0	0	0	unknown
OG0010153	0	0	0	0	0	0	0	0	5	0	0	0	0	0	0		GO:0055114(oxidation-reduction process)	GO:0016491(oxidoreductase activity)
OG0010155	0	0	0	0	0	0	0	0	5	0	0	0	0	0	0	unknown
OG0010158	0	0	0	0	0	0	0	0	5	0	0	0	0	0	0	unknown

## Sheet: Table S6
Table S6. Protein identity of HD and surrounding protein between W. hoelen, W. cocos and L. sulphureus
W. hoelen protein ID	W. cocos protein ID	Genes	Identity	e value		W. hoelen protein ID	L.sulphureus protein ID	Genes	Identity	e value
Who2.498	PCH33986.1	hypothetical protein	0.95	5e-143		Who2.498	KZT02455.1	hypothetical protein	0.59	6e-77
Who2.499	PCH33985.1	MFS polyamine transporter	0.96	0		Who2.499	KZT02454.1	MFS polyamine transporter	0.75	0
Who2.500	PCH33984.1	beta-flanking protein	0.95	0		Who2.500	KZT02453.1	beta-flanking protein	0.72	6e-61
Who2.501	PCH33983.1	hypothetical protein				Who2.501		hypothetical protein
Who2.502	PCH33982.1	hypothetical protein				Who2.502		hypothetical protein
	PCH33981.1					Who2.503	KZT02452.1	HD1	0.41	2e-15
	PCH33980.1					Who2.504	KZT02451.1	HD2	0.31	2e-30
Who2.503	PCH33979.1	HD1	0.43	6e-55			KZT02450.1	HD1
Who2.504	PCH33978.1	HD2	0.39	2e-45			KZT02449.1	HD1
Who2.505	PCH33977.1	mitochondrial intermediate peptidase	0.98	0		Who2.505	KZT02448.1	mitochondrial intermediate peptidase	0.83	0
Who2.506	PCH33976.1	hypothetical protein	0.99	0		Who2.506	KZT02447.1	hypothetical protein	0.66	0
Who2.507	PCH33975.1	DUF1754-domain-containing protein	1	8e-95		Who2.507	KZT02446.1	DUF1754-domain-containing protein	0.73	6e-45
Who2.508	PCH33974.1	DUF1751-domain-containing protein	0.99	0		Who2.508	KZT02445.1	DUF1751-domain-containing protein	0.8	0
Who2.509	PCH33973.1	hypothetical protein	0.96	0		Who2.509	KZT02444.1	Vps51/Vps67 domain-containing protein	0.45	0
	PCH33972.1						KZT02443.1	hypothetical protein
Who2.510	PCH33971.1	protein translocase SEC6	0.97	3e-40		Who2.510	KZT02442.1	protein translocase SEC6	0.96	1e-45
Who2.511	PCH33970.1	hypothetical protein	0.96	0		Who2.511
Who2.512	PCH33969.1	putative glycine dehydrogenase	0.99	0		Who2.512	KZT02440.1	putative glycine dehydrogenase	0.83	0
Who2.513	PCH33968.1	chromatin structure-remodeling complex subunit rsc9	0.99	0		Who2.513	KZT02438.1	chromatin structure-remodeling complex subunit rsc9	0.65	0
Who2.514	PCH33967.1	hypothetical protein	0.98	0		Who2.514	KZT02437.1	hypothetical protein	0.67	0
Who2.515	PCH33966.1	GDP-fucose transporter 1	0.98	0		Who2.515	KZT02436.1	GDP-fucose transporter 1	0.72	6e-163
Who2.516	PCH33965.1	ankyrin repeat and KH domain-containing protein 1	0.96	0		Who2.516
Who2.517	PCH33964.1	hypothetical protein	0.82	1e-167		Who2.517
Who2.518	PCH33963.1	hypothetical protein	0.95	0		Who2.518
	PCH33962.1					Who2.519	KZT02434.1	hypothetical protein	0.64	0
	PCH33961.1					Who2.520
	PCH33960.1					Who2.521
	PCH33959.1					Who2.522	KZT02433.1	F-box only protein 21	0.55	0
	PCH33958.1					Who2.523
	PCH33957.1					Who2.524
Who2.519	PCH33956.1	hypothetical protein	0.99	0		Who2.525	KZT02431.1	MFS general substrate transporter	0.74	0
Who2.520	PCH33955.1	ankyrin repeat and KH domain-containing protein mask	0.99	0		Who2.526	KZT02429.1	ketopantoate reductase-like protein	0.53	2e-148
Who2.521	PCH33954.1	hypothetical protein	0.83	1e-134		Who2.527	KZT02428.1	Aldo keto reductase	0.85	0
	PCH33953.1	hypothetical protein				Who2.528	KZT02427.1		0.49	2e-103
Who2.522	PCH33952.1	F-box only protein 21	0.97	0		Who2.529	KZT02426.1	HD3	0.52	5e-81
Who2.523	PCH33951.1	hypothetical protein	0.8	0		Who2.530	KZT02424.1	WD40 repeat-like protein	0.58	0
Who2.524	PCH33950.1	respiratory supercomplex factor 2	0.95	4e-133		Who2.531	KZT02423.1		0.76	0
Who2.525	PCH33949.1	vacuolar membrane amino acid uptake transporter fnx2	0.99	0		Who2.532
Who2.526
Who2.527	PCH33947.1	probable NAD(P)H-dependent D-xylose reductase xyl1	1	0
Who2.528	PCH33946.1	hypothetical protein	0.92	0
Who2.529		HD3	0.99	1.35e-151
Who2.530	PCH33944.1	WD repeat-containing protein 75	0.99	0
Who2.531	PCH33943.1	transcriptional activator of proteases prtT	0.99	0
Who2.532	PCH33942.1	adenylate-forming reductase Nps11	0.98	0

## Sheet: Table S7
Table S7. Repetitive sequences between HD1 and previous gene
Chr02	LTR/Gypsy	3902385	3903080	-	Motif:Contig12:1425422..1433557_INT
Chr02	MITE	3903321	3903957	+	Motif:SS20_MITE_11_882
Chr02	LTR/Gypsy	3905054	3905435	-	Motif:Contig12:2245903..2246285_LTR
Chr02	Unknown	3905512	3906370	-	Motif:rnd-1_family-8
Chr02	LTR/Gypsy	3906356	3907079	-	Motif:Contig17:525799..526564_LTR
Chr02	LTR/Gypsy	3907080	3907190	-	Motif:Contig2:1899608..1914887_INT
Chr02	LTR/Gypsy	3907191	3907898	+	Motif:Contig17:525799..526564_LTR
Chr02	LTR/Gypsy	3907899	3913425	+	Motif:Contig2:1906170..1914068_INT
Chr02	LTR/Gypsy	3913421	3913599	+	Motif:Contig11:2081877..2082417_LTR
Chr02	LTR/Gypsy	3913567	3915797	+	Motif:Contig2:1906170..1914068_INT
Chr02	LTR/Gypsy	3915798	3916505	+	Motif:Contig17:525799..526564_LTR
Chr02	LTR/Gypsy	3916505	3922359	-	Motif:Contig2:1899608..1914887_INT
Chr02	LTR/Gypsy	3922360	3923069	-	Motif:Contig17:525799..526564_LTR
Chr02	Unknown	3923070	3923966	-	Motif:rnd-1_family-8
Chr02	Unknown	3923994	3925019	-	Motif:rnd-1_family-8
Chr02	MITE	3925020	3925145	+	Motif:SS20_MITE_1_3291
Chr02	Unknown	3925146	3925875	-	Motif:rnd-1_family-8
Chr02	MITE	3926075	3926752	-	Motif:SS20_MITE_5_3179
Chr02	MITE	3926792	3927781	+	Motif:SS20_MITE_6_2335
Chr02	LTR/unknown	3928136	3928325	-	Motif:Contig1:2796474..2811824_INT
Chr02	LTR/unknown	3928248	3928337	+	Motif:Contig1:2796474..2811824_INT
Chr02	DNA	3928338	3930692	+	Motif:rnd-1_family-117
Chr02	DNA	3930321	3931045	-	Motif:rnd-1_family-288
Chr02	LTR	3931025	3931229	-	Motif:rnd-1_family-217
Chr02	LTR	3931230	3931258	+	Motif:rnd-1_family-215
Chr02	LTR/unknown	3931230	3931637	-	Motif:Contig1:2796474..2811824_INT
Chr02	LTR/unknown	3931637	3932226	+	Motif:Contig1:2796474..2811824_INT
Chr02	LTR/unknown	3932212	3932312	-	Motif:Contig1:2796474..2811824_INT
Chr02	LTR/Gypsy	3932485	3932855	-	Motif:Contig3:908949..909321_LTR

## Sheet: Table S8
Table S8. Identity of pheromone receptor and precusors between W.hoelen, W.cocos and L. sulphureus
W. hoelen protein ID	W. cocos protein ID	Genes	Identity	e value
Who6.737	PCH39328.1	pheromone receptor	0.96	0
	PCH39855.1	pheromone receptor	0.89	0
	PCH42926.1	pheromone receptor	0.48	2e-139
Who10.181	PCH42921.1	pheromone receptor	0.94	0
Who10.184	PCH42926.1	pheromone receptor	0.99	0
	PCH39855.1	pheromone receptor	0.5	1e-145
	PCH39328.1	pheromone receptor	0.49	2e-143
Who20.37	PCH39855.1	pheromone receptor	0.99	0
	PCH39328.1	pheromone receptor	0.88	0
	PCH42926.1	pheromone receptor	0.48	2e-142
W. hoelen protein ID	L.sulphureus protein ID	Genes	Identity	e value
Who6.737	KZT00247.1	pheromone receptor	0.5	3e-149
Who10.181	KZT00250.1	pheromone receptor	0.34	4e-54
Who10.184	KZT00247.1	pheromone receptor	0.65	0
Who20.37	KZT00247.1	pheromone receptor	0.5	1e-152

## Sheet: Table S9
Table S9. Number of specific CAZymes in 19 species of Polyporales
			AAs (auxiliary activities) family											CEs (carbohydrate esterases) family										GHs (glycoside hydrolases) family
Nutritional strategy	Species	Family (Polyporales)	AA1	AA2	AA3	AA5	AA6	AA7	AA8	AA9	AA12	AA14	Total	CE1	CE2	CE4	CE8	CE9	CE12	CE15	CE16	CE7	Total	GH0	GH1	GH2	GH3	GH5	GH6	GH7	GH9	GH10	GH11	GH12	GH13	GH15	GH16	GH17	GH18	GH20	GH25	GH27	GH28	GH29	GH30	GH31	GH32	GH35	GH37
WB	Fomes fomentarius	Polyporaceae	9	17	37	16	1	4	1	16	0	4	105	2	1	3	1	1	1	1	5	0	15	1	2	6	8	21	1	4	1	7	-	6	9	2	21	1	23	5	2	3	11	1	2	6	1	4	2
WB	Ganoderma sinense	Ganodermataceae	19	11	33	13	1	6	1	12	0	4	100	2	-	3	1	1	1	1	9	0	18	1	3	3	13	15	1	3	1	8	-	4	10	4	31	1	41	4	2	2	7	-	2	7	-	8	2
WB	Polyporus brumalis	Polyporaceae	11	18	33	8	3	4	2	12	0	4	95	2	1	3	3	1	1	1	6	1	18	1	2	4	9	18	1	3	1	6	-	3	9	2	24	1	17	5	1	3	9	-	3	6	1	4	2
WB	Grifola frondosa	Grifolaceae	12	17	17	7	1	-	1	6	0	3	64	-	-	3	1	1	-	1	2	0	8	2	2	2	7	14	1	3	1	4	-	3	7	2	11	1	9	5	1	2	2	1	2	4	-	2	2
			Average number										91	Average number									14.75	Average number
WB/C	Irpex lacteus	Irpicaceae	1	11	26	7	3	0	1	15	1	2	67	1	1	3	2	1	-	2	2	1	12	1	2	3	9	25	1	4	1	6	-	3	9	3	13	1	10	5	1	4	7	1	1	6	-	4	2
WB/C	Trametes pubescens	Polyporaceae	8	21	25	7	1	1	1	11	0	4	79	3	-	3	1	1	1	1	2	1	12	-	3	3	9	20	1	4	1	5	-	4	6	4	17	1	15	7	1	3	5	-	4	5	2	1	2
WB/C	Gelatoporia subvermispora	Gelatoporaceae	9	17	19	3	-	-	1	7	0	2	58	1	1	3	-	1	-	2	4	0	12	1	3	4	6	15	-	3	-	6	1	2	7	3	10	1	12	3	1	3	4	-	1	5	-	1	2
WB/C	Polyporus arcularius	Polyporaceae	11	18	33	8	4	3	1	12	0	4	94	3	1	3	3	1	1	1	6	0	19	1	2	4	9	18	1	3	1	6	-	2	9	2	22	1	17	5	1	2	9	-	3	6	1	4	2
WB/C	Trametes versicolor	Polyporaceae	9	27	23	9	1	1	1	13	0	4	88	3	1	3	1	1	-	1	3	0	13	-	2	5	12	20	1	4	1	6	-	5	7	4	21	1	16	5	1	2	7	-	4	5	3	2	2
			Average number										77.2	Average number									13.6	Average number
WC	Climacocystis borealis	Incertae sedis	11	15	26	5	1	-	2	11	0	3	74	1	1	3	1	1	1	1	5	0	14	-	3	2	9	17	1	3	1	4	-	3	8	2	12	1	11	4	2	5	4	1	1	7	-	3	2
WC	Dichomitus squalens	Polyporaceae	13	13	33	9	1	3	1	11	0	4	88	-	1	2	1	1	2	1	6	0	14	-	3	4	8	18	1	3	-	5	-	3	9	2	23	1	15	4	2	4	5	-	2	6	2	3	2
WC	Phlebiopsis gigantea	Phanerochaetaceae	5	9	22	7	4	1	1	10	0	2	61	-	1	3	2	1	-	1	5	0	13	1	2	2	9	18	1	5	1	4	2	3	9	2	13	1	11	4	1	3	8	-	2	6	-	2	2
WC	Pycnoporellus fulgens	Pycnoporellaceae	7	1	11	3	1	-	-	-	0	2	25	-	1	2	1	1	-	-	1	0	6	1	2	3	7	14	-	-	1	3	-	1	7	2	10	-	9	3	-	1	2	-	1	4	-	1	2
			Average number										62	Average number									11.75	Average number
BC	Fibroporia radiculosa	Fibroporiaceae	4	1	19	3	1	1	-	-	0	2	31	-	-	1	2	1	-	-	2	0	6	1	2	3	6	13	-	-	-	3	-	1	7	2	7	-	8	2	-	1	7	-	1	5	-	-	2
BC	Fomitopsis rosea	Fomitopsidaceae	4	1	20	5	-	1	-	2	0	1	34	-	-	3	2	-	-	-	4	0	9	1	2	3	9	20	-	-	-	3	-	1	8	2	7	-	11	3	-	2	5	-	4	4	-	2	2
BC	Postia placenta	Rhodoniaceae	4	2	22	3	1	-	-	-	0	2	34	-	-	2	2	1	-	1	2	0	8	1	2	3	6	15	-	-	-	3	-	2	7	2	15	-	8	3	-	2	4	-	3	4	-	1	3
BC	Sparassis crispa	Sparassidaceae	5	2	11	3	1	-	-	-	0	3	25	-	1	1	-	1	-	-	2	0	5	1	2	3	7	13	-	-	-	1	-	2	6	2	11	-	9	3	-	2	-	-	2	4	-	2	2
BC	Wolfiporia hoelen	Laetiporaceae	5	2	14	4	1	-	-	-	0	2	28	-	-	4	1	1	-	1	3	0	10	1	1	3	9	15	-	-	-	4	-	2	7	3	9	-	7	2	-	1	7	-	2	6	-	1	2
BC	Wolfiporia cocos	Laetiporaceae	5	2	14	4	1	-	-	-	0	2	28	-	-	3	1	1	-	1	3	0	9	1	1	3	8	14	-	-	-	4	-	2	6	2	9	-	9	2	-	1	6	-	2	5	-	2	2
			Average number										30	Average number									7.83333	Average number
[truncated: 84 more columns]

## Sheet: Table S10
Table S10. Number of CAZymes in 19 species of Polyporales
	AA	CE	GT	GH	PL	CBM
Ganoderma sinense	100	18	55	248	9	8	438
Grifola frondosa	64	8	53	133	7	3	268
Fomes fomentarius	105	15	60	219	20	11	430
Polyporus brumalis	95	19	61	195	13	9	392
Gelatoporia subvermispora	58	12	56	133	6	8	273
Polyporus arcularius	94	19	63	189	10	8	383
Trametes versicolor	88	13	66	189	9	11	376
Irpex lacteus	67	13	51	184	7	4	326
Trametes pubescens	79	13	62	170	11	9	344
Dichomitus squalens	88	14	57	180	10	5	354
Pycnoporellus fulgens	25	6	52	108	5	2	198
Climacocystis borealis	74	14	60	154	11	8	321
Phlebiopsis gigantea	61	13	53	158	4	4	293
Fibroporia radiculosa	31	6	47	101	3	2	190
Fomitopsis rosea	34	9	53	132	3	3	234
Wolfiporia hoelen	28	10	54	117	2	3	214
Postia placenta	34	8	56	116	4	2	220
Sparassis latifolia	25	5	53	102	5	1	191
Wolfiporia cocos	28	9	49	113	3	3	205

[truncated: 6 more sheets: Table S11, Table S12, Table S13, Table S14, Table S15, Table S16]
